# Supplementary material for: Genomic Analysis of Vavilov’s Historic Chickpea Landraces Reveals Footprints of Environmental and Human Selection
Source: MDPI journal article supplement (doi:10.3390/ijms21113952), 2020-05-31
Supplement: s1 [file s1]

**Table S1 List of accessions, collection sites and accession's groups.**

(see TableS1.xlsx)

**Table S2 List of bioclimatic variables and their abbreviations.**

| <b>Bioclimatic variable</b>                      | <b>Abbreviation</b> |
|--------------------------------------------------|---------------------|
| Annual mean temperature, °C * 10                 | BIO <sub>1</sub>    |
| Mean diurnal range, °C * 10                      | BIO <sub>2</sub>    |
| Isothermality, %                                 | BIO <sub>3</sub>    |
| Temperature seasonality, standard deviation *100 | BIO <sub>4</sub>    |
| Max temperature of warmest month, °C * 10        | BIO <sub>5</sub>    |
| Min temperature of coldest month, °C * 10        | BIO <sub>6</sub>    |
| Temperature annual range, °C * 10                | BIO <sub>7</sub>    |
| Mean temperature of wettest quarter, °C * 10     | BIO <sub>8</sub>    |
| Mean temperature of warmest quarter, °C * 10     | BIO <sub>10</sub>   |
| Mean temperature of coldest quarter, °C * 10     | BIO <sub>11</sub>   |
| Annual precipitation, mm                         | BIO <sub>12</sub>   |
| Precipitation of wettest month, mm               | BIO <sub>13</sub>   |
| Precipitation of driest month, mm                | BIO <sub>14</sub>   |
| Precipitation seasonality, mm                    | BIO <sub>15</sub>   |
| Precipitation of wettest quarter, mm             | BIO <sub>16</sub>   |
| Precipitation of driest quarter, mm              | BIO <sub>17</sub>   |

|                                      |                   |
|--------------------------------------|-------------------|
| Precipitation of warmest quarter, mm | BIO <sub>18</sub> |
| Precipitation of coldest quarter, mm | BIO <sub>19</sub> |
| Digital elevation model, m           | DEM               |

**Table S3 Groups of correlated bioclimatic variables.**

| Group    | Bioclimatic variables                                                                                             |
|----------|-------------------------------------------------------------------------------------------------------------------|
| Group №1 | BIO <sub>1</sub> , BIO <sub>3</sub> , BIO <sub>6</sub> , BIO <sub>8</sub> , BIO <sub>11</sub> , BIO <sub>15</sub> |
| Group №2 | BIO <sub>12</sub> , BIO <sub>13</sub> , BIO <sub>16</sub> , BIO <sub>18</sub>                                     |
| Group №3 | BIO <sub>5</sub> , BIO <sub>10</sub>                                                                              |
| Group №4 | BIO <sub>14</sub> , BIO <sub>17</sub>                                                                             |
| Group №5 | BIO <sub>4</sub> , BIO <sub>7</sub>                                                                               |

**Table S4 List of phenotypes and their abbreviations.**

| Phenotype                                                         | Abbreviation  |
|-------------------------------------------------------------------|---------------|
| <i>Ascochyta</i> resistance, score                                | AscoRes       |
| <i>Ascochyta</i> the degree of damage, score                      | AsoDes        |
| Biological yield, g                                               | Byld          |
| Bush shape, score                                                 | BushShape     |
| Days from end of flowering to beginning of maturation, days       | EndFloBegMatu |
| Days from beginning of flowering to beginning of maturation, days | BegFloBegMatu |
| Days from beginning of flowering to end of flowering, days        | BegFloEndFlo  |

|                                                                     |                  |
|---------------------------------------------------------------------|------------------|
| Days from beginning of maturation to end of maturation, days        | BegMatuEndMatu   |
| Days from beginning of germination to end of germination, days      | Germ             |
| Days from beginning of germination to beginning of flowering, days  | GermBegFlo       |
| Days from beginning of germination to beginning of maturation, days | GermBegMatu      |
| Days from beginning of germination to end of flowering, days        | GermEndFlo       |
| Days from beginning of germination to end of maturation, days       | GermEndMatu      |
| Flower colour, score                                                | FloCol           |
| Height of lower pod attachment, cm                                  | Hlp              |
| Leaf size, score                                                    | SizeLeaf         |
| Length of the primary branches, score                               | StemLengthIorder |
| Number of pods per plant, PCs                                       | PPP              |
| Number of seeds per plant, PCs                                      | SPP              |
| Peduncle colour, score                                              | FlowstemColo     |
| Plant height, cm                                                    | Ptht             |
| Plant weight without pods, g                                        | WpWp             |
| Pods weight, g                                                      | PodsWeight       |
| Pod length, mm                                                      | PDL              |
| Pod width, mm                                                       | PDW              |
| Pod drop, score                                                     | PodDrop          |
| Pod shape, score                                                    | PodSH            |
| Pod shattering, score                                               | PodShat          |

|                                                         |                       |
|---------------------------------------------------------|-----------------------|
| Seed colour, score                                      | SCO                   |
| Seed shape, score                                       | SSH                   |
| Seeds weight per plant, g                               | SYDS                  |
| Stem branchness, score                                  | StemBranchness        |
| Stem colour, score                                      | StemColo              |
| The nature of the branching (secondary branches), score | StemBranch2order      |
| The nature of the branching (primary branches), score   | StemBranchiness1order |
| Thousand seeds weight, g                                | TSW                   |

**Table S5 The nucleotide diversity ( $\pi$ ) estimated separately for each chromosome and geographical group.**

| Chromosome | Ethiopia | India | Lebanon | Morocco | Turkey | Central Asia |
|------------|----------|-------|---------|---------|--------|--------------|
| 1          | 0.11*    | 0.21  | 0.25    | 0.23    | 0.18   | 0.26         |
| 2          | 0.16     | 0.26  | 0.26    | 0.29    | 0.30   | 0.31         |
| 3          | 0.07     | 0.19  | 0.19    | 0.15    | 0.14   | 0.29         |
| 4          | 0.16     | 0.21  | 0.22    | 0.29    | 0.29   | 0.30         |
| 5          | 0.13     | 0.19  | 0.21    | 0.23    | 0.19   | 0.26         |
| 6          | 0.11     | 0.23  | 0.15    | 0.15    | 0.15   | 0.26         |
| 7          | 0.15     | 0.31  | 0.22    | 0.21    | 0.22   | 0.27         |
| 8          | 0.18     | 0.22  | 0.27    | 0.25    | 0.29   | 0.31         |

\* - differences between Ethiopia and other geographical group are statistically significant for each chromosome, the same holds for Central Asian group.

**Table S6 The proportion of variance in a phenotype explained by all GWAS SNPs (i.e. the SNP-based heritability) for phenotypic data.**

| <b>Phenotype</b>                                                        | <b>Genotype<br/>variation<br/>(SE*)</b> | <b>Phenotype<br/>variation<br/>(SE*)</b> | <b>SNP-based<br/>heritability<br/>(SE*)</b> | <b>p-value</b> |
|-------------------------------------------------------------------------|-----------------------------------------|------------------------------------------|---------------------------------------------|----------------|
| Days from end of<br>flowering to<br>beginning of<br>maturation          | 0.004129<br>(0.001526)                  | 0.027148<br>(0.001938)                   | 0.152087<br>(0.053459)                      | 2.978e-09      |
| Pods weight                                                             | 0.002590<br>(0.001024)                  | 0.023239<br>(0.001640)                   | 0.111450<br>(0.042771)                      | 1.246e-12      |
| <i>Ascochyta</i><br>resistance                                          | 0.012743<br>(0.004685)                  | 0.096856<br>(0.006859)                   | 0.131571<br>(0.046425)                      | 2.837e-14      |
| <i>Ascochyta</i> the<br>degree of damage                                | 0.012743<br>(0.004685)                  | 0.096856<br>(0.006859)                   | 0.131571<br>(0.046425)                      | 2.837e-14      |
| Days from<br>beginning of<br>flowering to<br>beginning of<br>maturation | 0.000977<br>(0.000482)                  | 0.012585<br>(0.000887)                   | 0.077594<br>(0.037848)                      | 0.0002352      |
| Days from<br>beginning of                                               | 0.002113<br>(0.000891)                  | 0.017793<br>(0.001259)                   | 0.118763<br>(0.048552)                      | 3.774e-07      |

|                                                                          |                        |                        |                        |           |
|--------------------------------------------------------------------------|------------------------|------------------------|------------------------|-----------|
| flowering to end<br>of flowering                                         |                        |                        |                        |           |
| Days from<br>beginning of<br>maturation to end<br>of maturation          | 0.000674<br>(0.000304) | 0.008940<br>(0.000630) | 0.075381<br>(0.033571) | 2.65e-07  |
| Bush shape                                                               | 0.007024<br>(0.002430) | 0.038928<br>(0.002802) | 0.180438<br>(0.058308) | 8.343e-10 |
| Biological yield                                                         | 0.007063<br>(0.001939) | 0.026135<br>(0.001962) | 0.270261<br>(0.064620) | 4.602e-30 |
| Flower colour                                                            | 0.007769<br>(0.001459) | 0.014672<br>(0.001278) | 0.529494<br>(0.064950) | 3.048e-68 |
| Peduncle colour                                                          | 0.137912<br>(0.018070) | 0.158668<br>(0.016023) | 0.869184<br>(0.033109) | 2.322e-95 |
| Days from<br>beginning of<br>germination to<br>end of<br>germination     | 0.000926<br>(0.000393) | 0.010681<br>(0.000753) | 0.086721<br>(0.036112) | 5.78e-10  |
| Days from<br>beginning of<br>germination to<br>beginning of<br>flowering | 0.001010<br>(0.000306) | 0.005561<br>(0.000399) | 0.181642<br>(0.051013) | 1.856e-22 |

|                                                               |                        |                        |                        |           |
|---------------------------------------------------------------|------------------------|------------------------|------------------------|-----------|
| Days from beginning of germination to beginning of maturation | 0.000726<br>(0.000364) | 0.009810<br>(0.000691) | 0.073985<br>(0.036717) | 1.148e-06 |
| Days from beginning of germination to end of flowering        | 0.001100<br>(0.000508) | 0.011691<br>(0.000824) | 0.094063<br>(0.042638) | 9.032e-06 |
| Days from beginning of germination to end of maturation       | 0.001951<br>(0.000732) | 0.015608<br>(0.001105) | 0.124988<br>(0.045186) | 7.725e-13 |
| Height of lower pod attachment                                | 0.002566<br>(0.000949) | 0.019848<br>(0.001405) | 0.129292<br>(0.045960) | 3.29e-13  |
| Pod length                                                    | 0.002771<br>(0.000623) | 0.007645<br>(0.000600) | 0.362526<br>(0.064794) | 8.567e-59 |
| Pod width                                                     | 0.009149<br>(0.001987) | 0.022513<br>(0.001824) | 0.406368<br>(0.067230) | 8.524e-63 |
| Pod drop                                                      | 0.008981<br>(0.006800) | 0.243616<br>(0.017166) | 0.036866<br>(0.027985) | 0.01196   |
| Pod shape                                                     | 0.006080<br>(0.001589) | 0.023356<br>(0.001732) | 0.260306<br>(0.059463) | 6.084e-27 |
| Pod shattering                                                | 0.010091               | 0.242713               | 0.041576               | 0.00761   |

|                                                           |                        |                        |                        |           |
|-----------------------------------------------------------|------------------------|------------------------|------------------------|-----------|
|                                                           | (0.006941)             | (0.017089)             | (0.028629)             |           |
| Number of pods<br>per plant                               | 0.001360<br>(0.000720) | 0.019881<br>(0.001399) | 0.068411<br>(0.035921) | 0.0004563 |
| Plant height                                              | 0.004750<br>(0.001152) | 0.013878<br>(0.001086) | 0.342281<br>(0.067707) | 3.511e-46 |
| Seed colour                                               | 0.074101<br>(0.010658) | 0.091479<br>(0.009254) | 0.810035<br>(0.042686) | 6.139e-82 |
| Leaf size                                                 | 0.021757<br>(0.005475) | 0.063592<br>(0.005010) | 0.342136<br>(0.070480) | 2.716e-37 |
| Number of seeds<br>per plant                              | 0.001857<br>(0.000869) | 0.024829<br>(0.001747) | 0.074797<br>(0.034589) | 3.575e-08 |
| Seed shape                                                | 0.011722<br>(0.003608) | 0.052466<br>(0.003843) | 0.223428<br>(0.062258) | 3.636e-14 |
| The nature of the<br>branching<br>(secondary<br>branches) | 0.000916<br>(0.000500) | 0.021587<br>(0.001519) | 0.042412<br>(0.023111) | 6.28e-06  |
| The nature of the<br>branching<br>(primary<br>branches)   | 0.023745<br>(0.009515) | 0.206547<br>(0.014567) | 0.114962<br>(0.044669) | 3.999e-10 |
| Stem branchness                                           | 0.001297<br>(0.001255) | 0.071521<br>(0.005049) | 0.018130<br>(0.017624) | 0.04729   |
| Stem colour                                               | 0.069536               | 0.111903               | 0.621397               | 2.247e-75 |



|                                   |                        |                        |                        |           |
|-----------------------------------|------------------------|------------------------|------------------------|-----------|
|                                   | (0.012038)             | (0.010346)             | (0.060977)             |           |
| Length of the<br>primary branches | 0.005564<br>(0.002460) | 0.077457<br>(0.005443) | 0.071828<br>(0.031351) | 4.17e-11  |
| Seeds weight per<br>plant         | 0.002587<br>(0.001057) | 0.023979<br>(0.001691) | 0.107894<br>(0.042904) | 6.778e-10 |
| Thousand seeds<br>weight          | 0.015501<br>(0.002718) | 0.024210<br>(0.002301) | 0.640276<br>(0.061915) | 7.008e-91 |
| Plant weight<br>without pods      | 0.006433<br>(0.001432) | 0.016548<br>(0.001326) | 0.388721<br>(0.067201) | 1.047e-42 |

\* - Standard Error.

**Table S7 Significant SNPs for phenotypic traits and bioclimatic variables.** GWAS analysis with the first 8 PCA axes scores used as covariates and GWAS analysis including the first 8 PCA axes scores and the first 2 PCoA axes scores as covariates for all traits. Annotation of significant associated markers was performed using SNPEff program, Legume information system (LIS) and LegumeIP databases.

(see TableS7.xlsx)

**Table S8 Haploblocks inferred by Haploview tools.**

(see TableS8.xlsx)

**Table S9 List of haploblocks enriched for SNPs associated with phenotypes and bioclimatic variables.**

| <b>Haploblocks*</b>                                                                                                                                                     | <b>Variable</b> |
|-------------------------------------------------------------------------------------------------------------------------------------------------------------------------|-----------------|
| Ca6_Block_9, Ca2_Block_21, Ca4_Block_69, Ca8_Block_9                                                                                                                    | AscoRes         |
| Ca1_Block_38, Ca4_Block_9, Ca4_Block_13, Ca4_Block_14,<br>Ca5_Block_4, Ca3_Block_2, Ca7_Block_12, Ca3_Block_7,<br>Ca1_Block_19                                          | BegFloEndFlo    |
| Ca4_Block_8, Ca4_Block_74, Ca7_Block_12, Ca1_Block_27,<br>Ca8_Block_3                                                                                                   | BegMatuEndMatu  |
| Ca1_Block_25, Ca8_Block_6, Ca4_Block_8                                                                                                                                  | BushShape       |
| Ca4_Block_8, Ca8_Block_6, Ca4_Block_5, Ca1_Block_28                                                                                                                     | Byld            |
| Ca1_Block_38, Ca3_Block_2, Ca4_Block_9, Ca4_Block_13,<br>Ca4_Block_14, Ca4_Block_15, Ca5_Block_4, Ca7_Block_12,<br>Ca5_Block_7, Ca3_Block_7, Ca4_Block_12, Ca4_Block_69 | EndFloBegMatu   |
| Ca4_Block_5, Ca8_Block_7, Ca1_Block_2, Ca1_Block_25,<br>Ca4_Block_23, Ca6_Block_9, Ca4_Block_1, Ca4_Block_4,<br>Ca4_Block_12, Ca4_Block_67                              | FloCol          |
| Ca6_Block_16, Ca8_Block_7, Ca4_Block_30, Ca7_Block_1,<br>Ca6_Block_17                                                                                                   | FlowstemColo    |
| Ca4_Block_9, Ca4_Block_15, Ca8_Block_6, Ca4_Block_23,<br>Ca4_Block_67, Ca4_Block_68, Ca1_Block_27, Ca6_Block_3,<br>Ca8_Block_3, Ca5_Block_4, Ca1_Block_19               | Germ            |
| Ca3_Block_16, Ca4_Block_8, Ca6_Block_3, Ca6_Block_9,<br>Ca8_Block_6, Ca1_Block_28, Ca4_Block_9, Ca4_Block_13,<br>Ca1_Block_24, Ca6_Block_4, Ca8_Block_9, Ca6_Block_10,  | GermBegFlo      |

|                                                                                                                                              |            |
|----------------------------------------------------------------------------------------------------------------------------------------------|------------|
| Ca3_Block_7, Ca8_Block_3                                                                                                                     |            |
| Ca1_Block_25, Ca2_Block_21, Ca5_Block_4, Ca1_Block_27,<br>Ca8_Block_3, Ca4_Block_74, Ca6_Block_4, Ca4_Block_4                                | Hlp        |
| Ca1_Block_25, Ca7_Block_4, Ca5_Block_4, Ca2_Block_8                                                                                          | PDL        |
| Ca4_Block_67, Ca5_Block_4, Ca7_Block_4, Ca8_Block_9,<br>Ca4_Block_68, Ca7_Block_5, Ca1_Block_18, Ca3_Block_4,<br>Ca4_Block_66                | PDW        |
| Ca1_Block_28, Ca4_Block_5, Ca5_Block_4, Ca3_Block_4,<br>Ca4_Block_12, Ca6_Block_9, Ca4_Block_8, Ca7_Block_11,<br>Ca8_Block_9                 | PPP        |
| Ca3_Block_2, Ca3_Block_11, Ca8_Block_6, Ca7_Block_1,<br>Ca6_Block_2, Ca6_Block_29                                                            | PodDrop    |
| Ca3_Block_2, Ca4_Block_8, Ca4_Block_54, Ca4_Block_7,<br>Ca7_Block_1, Ca6_Block_4, Ca1_Block_18, Ca8_Block_3,<br>Ca4_Block_23                 | PodSH      |
| Ca3_Block_2, Ca4_Block_9, Ca4_Block_4, Ca4_Block_71,<br>Ca6_Block_2, Ca6_Block_4, Ca4_Block_8, Ca2_Block_8                                   | PodShat    |
| Ca4_Block_5, Ca4_Block_54, Ca2_Block_21, Ca5_Block_4,<br>Ca8_Block_6, Ca1_Block_28, Ca4_Block_8, Ca4_Block_13                                | PodsWeight |
| Ca2_Block_21, Ca4_Block_1, Ca4_Block_8, Ca8_Block_6,<br>Ca3_Block_16, Ca1_Block_25, Ca1_Block_28, Ca4_Block_66,<br>Ca4_Block_7, Ca4_Block_23 | Ptht       |
| Ca2_Block_8, Ca8_Block_7, Ca4_Block_4, Ca2_Block_21,                                                                                         | SCO        |

|                                                                                                                                                                                          |                     |
|------------------------------------------------------------------------------------------------------------------------------------------------------------------------------------------|---------------------|
| Ca4_Block_67                                                                                                                                                                             |                     |
| Ca1_Block_28, Ca3_Block_4, Ca4_Block_5, Ca4_Block_8,<br>Ca5_Block_4, Ca7_Block_12, Ca4_Block_40, Ca4_Block_67                                                                            | SPP                 |
| Ca4_Block_7, Ca4_Block_23, Ca5_Block_7, Ca1_Block_21,<br>Ca4_Block_71, Ca4_Block_4                                                                                                       | SSH                 |
| Ca4_Block_5, Ca5_Block_4, Ca4_Block_7, Ca3_Block_4,<br>Ca4_Block_54, Ca4_Block_8, Ca3_Block_7, Ca3_Block_17,<br>Ca1_Block_28, Ca8_Block_6                                                | SYDS                |
| Ca1_Block_27, Ca4_Block_13, Ca6_Block_10, Ca3_Block_4,<br>Ca6_Block_17, Ca1_Block_18, Ca1_Block_25, Ca5_Block_4,<br>Ca4_Block_29, Ca4_Block_4, Ca4_Block_67, Ca4_Block_8,<br>Ca6_Block_9 | SizeLeaf            |
| Ca2_Block_21, Ca4_Block_12                                                                                                                                                               | StemBranch2order    |
| Ca3_Block_4, Ca5_Block_7, Ca8_Block_7                                                                                                                                                    | StemBranchinnes1ord |
| Ca8_Block_7, Ca4_Block_1, Ca7_Block_12, Ca1_Block_37,<br>Ca8_Block_9                                                                                                                     | StemBranchness      |
| Ca8_Block_7, Ca8_Block_9, Ca3_Block_11, Ca6_Block_17,<br>Ca1_Block_27, Ca4_Block_5, Ca4_Block_13, Ca6_Block_16,<br>Ca8_Block_3                                                           | StemColo            |
| Ca1_Block_25, Ca4_Block_18, Ca1_Block_5                                                                                                                                                  | StemLength1order    |
| Ca1_Block_25, Ca1_Block_28, Ca8_Block_6, Ca1_Block_27,<br>Ca4_Block_18, Ca8_Block_9, Ca1_Block_18, Ca4_Block_23,<br>Ca4_Block_67, Ca7_Block_1, Ca1_Block_37, Ca4_Block_7,                | TSW                 |

|                                                                                                                              |                   |
|------------------------------------------------------------------------------------------------------------------------------|-------------------|
| Ca1_Block_40                                                                                                                 |                   |
| Ca4_Block_8, Ca8_Block_6, Ca3_Block_16, Ca4_Block_23,<br>Ca4_Block_4                                                         | WpWp              |
| Ca6_Block_28, Ca8_Block_6, Ca6_Block_2, Ca3_Block_2                                                                          | BIO <sub>1</sub>  |
| Ca6_Block_3, Ca4_Block_7, Ca6_Block_2, Ca8_Block_9,<br>Ca1_Block_25                                                          | BIO <sub>2</sub>  |
| Ca8_Block_3, Ca8_Block_9, Ca3_Block_16, Ca7_Block_12                                                                         | BIO <sub>3</sub>  |
| Ca4_Block_4, Ca4_Block_9                                                                                                     | BIO <sub>4</sub>  |
| Ca3_Block_2, Ca8_Block_6, Ca1_Block_21, Ca3_Block_16,<br>Ca3_Block_7, Ca6_Block_9                                            | BIO <sub>5</sub>  |
| Ca4_Block_9, Ca6_Block_2, Ca4_Block_4, Ca1_Block_27                                                                          | BIO <sub>6</sub>  |
| Ca4_Block_9, Ca6_Block_2, Ca4_Block_4, Ca7_Block_4,<br>Ca4_Block_11                                                          | BIO <sub>7</sub>  |
| Ca6_Block_2, Ca6_Block_28, Ca5_Block_4                                                                                       | BIO <sub>8</sub>  |
| Ca3_Block_2, Ca8_Block_6, Ca1_Block_21                                                                                       | BIO <sub>10</sub> |
| Ca6_Block_2, Ca4_Block_4, Ca8_Block_6, Ca5_Block_4                                                                           | BIO <sub>11</sub> |
| Ca6_Block_28, Ca6_Block_2, Ca4_Block_23, Ca4_Block_18,<br>Ca4_Block_9, Ca5_Block_4                                           | BIO <sub>12</sub> |
| Ca5_Block_4, Ca6_Block_2, Ca6_Block_28, Ca3_Block_7                                                                          | BIO <sub>13</sub> |
| Ca1_Block_25, Ca4_Block_1, Ca4_Block_7, Ca4_Block_8,<br>Ca8_Block_6, Ca6_Block_3, Ca6_Block_2, Ca1_Block_21,<br>Ca4_Block_66 | BIO <sub>14</sub> |

|                                                                                                                                            |                   |
|--------------------------------------------------------------------------------------------------------------------------------------------|-------------------|
| Ca1_Block_28, Ca1_Block_21, Ca5_Block_4                                                                                                    | BIO <sub>15</sub> |
| Ca5_Block_4, Ca6_Block_2, Ca6_Block_28, Ca4_Block_23,<br>Ca3_Block_7                                                                       | BIO <sub>16</sub> |
| Ca4_Block_7, Ca4_Block_8, Ca6_Block_2, Ca6_Block_3,<br>Ca8_Block_6, Ca3_Block_17, Ca4_Block_66, Ca1_Block_25,<br>Ca4_Block_1, Ca1_Block_21 | BIO <sub>17</sub> |
| Ca4_Block_23, Ca6_Block_2, Ca6_Block_28, Ca4_Block_74                                                                                      | BIO <sub>18</sub> |
| Ca2_Block_21, Ca5_Block_7, Ca6_Block_3, Ca7_Block_1,<br>Ca1_Block_18, Ca6_Block_9                                                          | BIO <sub>19</sub> |
| Ca6_Block_28, Ca6_Block_2, Ca4_Block_15, Ca4_Block_67,<br>Ca8_Block_6, Ca6_Block_3                                                         | DEM               |

\* - Haploblocks' coordinates are in Table S8.

**Table S10 Groups of phenotypes and variables similar in sets of enriched haploblocks.**

| Group     | Variables                                                                                                                                                                                                                   |
|-----------|-----------------------------------------------------------------------------------------------------------------------------------------------------------------------------------------------------------------------------|
| Group1    | EndFloBegMatu, BegFloEndFlo                                                                                                                                                                                                 |
| Group2    | BIO <sub>1</sub> , BIO <sub>4</sub> , BIO <sub>6</sub> , BIO <sub>7</sub> , BIO <sub>8</sub> , BIO <sub>11</sub> , BIO <sub>12</sub> ,<br>BIO <sub>13</sub> , BIO <sub>16</sub> , BIO <sub>18</sub> , DEM, PodShat, PodDrop |
| SubGroup3 | FlowstemColo, StemColo, SCO, FloCol,<br>StemBranchinnes1ord, StemBranchness                                                                                                                                                 |
| SubGroup4 | BIO <sub>19</sub> , AscoRes, StemBranch2order                                                                                                                                                                               |
| Group5    | BIO <sub>2</sub> , BIO <sub>5</sub> , BIO <sub>10</sub> , BIO <sub>14</sub> , BIO <sub>17</sub> , WpWp, Ptht,<br>BushShape                                                                                                  |
| Group6    | Byld, PodsWeigth, SYDS, SPP, PPP                                                                                                                                                                                            |

|        |                                                                             |
|--------|-----------------------------------------------------------------------------|
| Group7 | GermBegFlo, PodSH, TSW, Germ, Hlp,<br>SizeLeaf, PDW, PDL, BIO <sub>15</sub> |
|--------|-----------------------------------------------------------------------------|

**Table S11 SNPs detected in current study and QTLs and SNPs from previous studies.**

(see TableS11.xlsx)

**Table S12 Haploblocks enriched for SNPs associated with phenotypes and bioclimatic variables detected in current study and QTLs and SNPs from previous studies.**

(see TableS12.xlsx)
