# Supplementary material for: Genomic Analysis of Vavilov’s Historic Chickpea Landraces Reveals Footprints of Environmental and Human Selection
Source: Int J Mol Sci. 2020 May 31;21(11):3952. doi: 10.3390/ijms21113952 (PMC7313079; doi:10.3390/ijms21113952)
Supplement: Supplementary file 1 [file ijms-21-03952-s001.zip]

Archive with 8 entries (8 files):
- Supplementary Figures S1-S20.pdf
- Supplementary Tables S1-S12.pdf
- Supplementary Texts S1-S3.pdf
- TableS1.xlsx
- TableS11.xlsx
- TableS12.xlsx
- TableS7.xlsx
- TableS8.xlsx
