# Supplementary material for: Genomic Analysis of Vavilov’s Historic Chickpea Landraces Reveals Footprints of Environmental and Human Selection
Source: Int J Mol Sci. 2020 May 31;21(11):3952. doi: 10.3390/ijms21113952 (PMC7313079; doi:10.3390/ijms21113952)
Supplement: Supplementary file 1 [file ijms-21-03952-s001.zip › TableS1.xlsx]

## Sheet: 407_ind
Table S1 List of accessions, collection sites and accession’s groups.
ID	Country of origin	Geographical group
VIR0002	Iran	Central Asia
VIR0003	Iran	Central Asia
VIR0004	Iran	Central Asia
VIR0005	Iran	Central Asia
VIR0021	India	India
VIR0023	India	India
VIR0024	India	India
VIR0025	India	India
VIR0026	India	India
VIR0027	India	India
VIR0028	India	India
VIR0030	India	India
VIR0031	India	India
VIR0033	India	India
VIR0034	India	India
VIR0036	India	India
VIR0037	India	India
VIR0038	India	India
VIR0039	India	India
VIR0040	India	India
VIR0041	India	India
VIR0042	India	India
VIR0043	India	India
VIR0111	Germany	Morocco
VIR0125	Israel	Lebanon
VIR0143	Iran	Central Asia
VIR0167	Iran	Central Asia
VIR0172	Iran	Central Asia
VIR0187	Armenia	Turkey
VIR0189	Armenia	Turkey
VE0111_0192	Ethiopia	Ethiopia
VIR0196	Iran	Central Asia
VIR0199	Russia (European)	Turkey
VIR0201	Turkmenistan	Central Asia
VIR0202	Afganistan	Central Asia
VIR0203	Afganistan	Central Asia
VIR0204	Afganistan	Central Asia
VIR0205	Afganistan	Central Asia
VIR0206	Afganistan	Central Asia
VIR0207	Afganistan	Central Asia
VIR0208	Afganistan	Central Asia
VIR0209	Afganistan	Central Asia
VIR0210	Afganistan	Central Asia
VIR0212	Afganistan	Central Asia
VIR0215	Afganistan	Central Asia
VIR0216	Afganistan	Central Asia
VIR0217	Afganistan	Central Asia
VIR0218	Afganistan	Central Asia
VIR0220	Afganistan	Central Asia
VIR0221	Afganistan	Central Asia
VIR0222	Afganistan	Central Asia
VIR0224	Afganistan	Central Asia
VIR0225	Afganistan	Central Asia
VIR0226	Afganistan	Central Asia
VIR0227	Afganistan	Central Asia
VIR0229	Afganistan	Central Asia
VIR0230	Afganistan	Central Asia
VIR0231	Afganistan	Central Asia
VIR0232	Afganistan	Central Asia
VIR0233	Afganistan	Central Asia
VIR0234	Afganistan	Central Asia
VIR0235	Afganistan	Central Asia
VIR0236	Afganistan	Central Asia
VIR0237	Afganistan	Central Asia
VIR0238	Afganistan	Central Asia
VIR0239	Afganistan	Central Asia
VIR0240	Afganistan	Central Asia
VIR0241	Afganistan	Central Asia
VIR0242	Afganistan	Central Asia
VIR0243	Afganistan	Central Asia
VIR0244	Afganistan	Central Asia
VIR0245	Afganistan	Central Asia
VIR0246	Afganistan	Central Asia
VIR0249	Afganistan	Central Asia
VIR0250	Afganistan	Central Asia
VIR0251	Afganistan	Central Asia
VIR0252	Afganistan	Central Asia
VIR0253	Afganistan	Central Asia
VIR0254	Afganistan	Central Asia
VIR0256	Afganistan	Central Asia
VIR0257	Afganistan	Central Asia
VIR0299	Iran	Central Asia
VIR0300	India	India
VIR0301	Pakistan	Central Asia
VIR0302	Pakistan	Central Asia
VIR0303	Africa	Morocco
VIR0306	Burma	India
VIR0308	Burma	India
VIR0312	Burma	India
VIR0313	Burma	India
VIR0314	Burma	India
VIR0315	Burma	India
VIR0325	Armenia	Turkey
VIR0328	Armenia	Turkey
VIR0336	Iran	Turkey
VIR0340	Turkey	Turkey
VT0003_0344	Turkey	Turkey
VIR0345	Turkey	Turkey
VT0005_0347	Turkey	Turkey
VT0006_0348	Turkey	Turkey
VT0007_0349	Turkey	Turkey
VT0008_0349	Turkey	Turkey
VT0009_0350	Turkey	Turkey
VT0010_0351	Turkey	Turkey
VT0011_0352	Turkey	Turkey
VT0012_0353	Turkey	Turkey
VT0013_0354	Turkey	Turkey
VT0014_0355	Turkey	Turkey
VT0015_0356	Turkey	Turkey
VIR0359	Turkey	Turkey
VIR0360	Turkey	Turkey
VT0018_0361	Turkey	Turkey
VT0019_0362	Turkey	Turkey
VIR0363	Turkey	Turkey
VT0020_0364	Turkey	Turkey
VT0021_0365	Turkey	Turkey
VIR0370	Iran	Central Asia
VIR0371	Iran	Central Asia
VIR0372	Iran	Central Asia
VIR0373	Iran	Central Asia
VIR0374	Iran	Central Asia
VIR0375	Iran	Central Asia
VIR0376	Iran	Central Asia
VIR0377	Iran	Central Asia
VIR0378	Iran	Central Asia
VIR0380	Iran	Central Asia
VIR0381	Iran	Central Asia
VIR0382	Iran	Central Asia
VIR0383	Iran	Central Asia
VIR0400	Uzbekistan	Central Asia
VIR0407	Iran	Central Asia
VIR0408	India	India
VIR0409	India	India
VIR0412	India	India
VIR0413	India	India
VIR0414	India	India
VE0112_0450	Ethiopia	Ethiopia
VIR0453	Algeria	Morocco
VIR0454	Algeria	Morocco
VIR0457	Algeria	Morocco
VIR0464	Algeria	Morocco
VIR0467	Morocco	Morocco
VIR0471	Morocco	Morocco
VIR0472	Algeria	Morocco
VIR0473	Algeria	Morocco
VIR0474	Tunisia	Morocco
VIR0482	Morocco	Morocco
VIR0483	Morocco	Morocco
VIR0533	Israel	Lebanon
VIR0535	Syria	Lebanon
VIR0539	Syria	Lebanon
VIR0540	Syria	Lebanon
VIR0542	Syria	Lebanon
VIR0543	Azerbaijan	Turkey
VIR0545	Azerbaijan	Turkey
VIR0584	Tunisia	Morocco
VIR0586	Syria	Lebanon
VIR0587	Syria	Lebanon
VIR0588	Syria	Lebanon
VIR0589	Syria	Lebanon
VT0022_0590	Turkey	Turkey
VT0025_0593	Turkey	Turkey
VT0027_0596	Turkey	Turkey
VIR0597	Turkey	Turkey
VT0028_0599	Turkey	Turkey
VT0029_0600	Turkey	Turkey
VIR0601	Turkey	Turkey
VT0031_0603	Turkey	Turkey
VIR0605	Turkey	Turkey
VT0033_0606	Turkey	Turkey
VT0035_0608	Turkey	Turkey
VT0038_0611	Turkey	Turkey
VIR0623	Jordan	Lebanon
VIR0626	Jordan	Lebanon
VIR0627	Israel	Lebanon
VIR0628	Israel	Lebanon
VIR0632	Jordan	Lebanon
VIR0633	Jordan	Lebanon
VIR0634	Jordan	Lebanon
VIR0635	Jordan	Lebanon
VIR0638	Jordan	Lebanon
VIR0641	Israel	Lebanon
VIR0642	Israel	Lebanon
VIR0643	Israel	Lebanon
VIR0644	Israel	Lebanon
VIR0647	Georgia	Turkey
VIR0668	Greece	Turkey
VIR0669	Cyprus	Lebanon
VIR0670	Cyprus	Lebanon
VIR0676	Italy	Morocco
VE0113_0687	Ethiopia	Ethiopia
VE0114_0688	Ethiopia	Ethiopia
VE0115_0689	Ethiopia	Ethiopia
VE0116_0690	Ethiopia	Ethiopia
VIR0691	Ethiopia	Ethiopia
VE0117_0692	Ethiopia	Ethiopia
VE0118_0693	Ethiopia	Ethiopia
VE0119_0694	Ethiopia	Ethiopia
VE0120_0695	Ethiopia	Ethiopia
VIR0704	Georgia	Turkey
VE0121_0726	Ethiopia	Ethiopia
VE0122_0727	Ethiopia	Ethiopia
VE0123_0728	Ethiopia	Ethiopia
VE0124_0729	Ethiopia	Ethiopia
VE0125_0730	Ethiopia	Ethiopia
VE0126_0731	Ethiopia	Ethiopia
VE0128_0733	Ethiopia	Ethiopia
VE0129_0734	Ethiopia	Ethiopia
VIR0735	Ethiopia	Ethiopia
VIR0736	Ethiopia	Ethiopia
VIR0737	Ethiopia	Ethiopia
VIR0738	Italy	Morocco
VIR0742	Sri Lanka	India
VE0131_0744	Ethiopia	Ethiopia
VE0132_0745	Ethiopia	Ethiopia
VE0133_0746	Ethiopia	Ethiopia
VE0134_0747	Ethiopia	Ethiopia
VE0135_0748	Ethiopia	Ethiopia
VE0136_0749	Ethiopia	Ethiopia
VE0137_0754	Ethiopia	Ethiopia
VE0139_0756	Ethiopia	Ethiopia
VE0140_0757	Ethiopia	Ethiopia
VE0141_0758	Ethiopia	Ethiopia
VE0142_0760	Ethiopia	Ethiopia
VE0143_0761	Ethiopia	Ethiopia
VE0144_0762	Ethiopia	Ethiopia
VE0145_0763	Ethiopia	Ethiopia
VE0146_0764	Ethiopia	Ethiopia
VIR0765	Ethiopia	Ethiopia
VE0147_0766	Ethiopia	Ethiopia
VE0148_0767	Ethiopia	Ethiopia
VE0149_0768	Ethiopia	Ethiopia
VE0150_0769	Ethiopia	Ethiopia
VE0151_0771	Ethiopia	Ethiopia
VE0152_0772	Ethiopia	Ethiopia
VIR0773	Italy	Morocco
VIR0774	Italy	Morocco
VIR0776	Italy	Morocco
VIR0787	Spain	Morocco
VT0039_0793	Turkey	Turkey
VIR0794	Italy	Morocco
VIR0795	Italy	Morocco
VIR0796	Italy	Morocco
VIR0797	Italy	Morocco
VIR0798	Italy	Morocco
VIR0799	Italy	Morocco
VIR0802	Italy	Morocco
VIR0804	Italy	Morocco
VIR0807	Italy	Morocco
VIR0810	Egypt	Lebanon
VIR0813	Egypt	Lebanon
VIR0815	Egypt	Lebanon
VIR0816	Egypt	Lebanon
VIR0833	Spain	Morocco
VIR0850	Portugal	Morocco
VIR0851	Portugal	Morocco
VIR0853	Italy	Morocco
VIR0855	Italy	Morocco
VT0040_0856	Turkey	Turkey
VT0041_0857	Turkey	Turkey
VIR0860	Turkey	Turkey
VIR0862	Turkey	Turkey
VT0044_0863	Turkey	Turkey
VT0045_0865	Turkey	Turkey
VT0046_0866	Turkey	Turkey
VT0047_0868	Turkey	Turkey
VT0048_0871	Turkey	Turkey
VT0049_0872	Turkey	Turkey
VT0050_0874	Turkey	Turkey
VIR0876	Turkey	Turkey
VIR0880	Turkey	Turkey
VIR0881	Turkey	Turkey
VT0051_0882	Turkey	Turkey
VT0052_0883	Turkey	Turkey
VIR0884	Turkey	Turkey
VIR0885	Cyprus	Lebanon
VE0153_0890	Ethiopia	Ethiopia
VT0053_0896	Turkey	Turkey
VT0054_0897	Turkey	Turkey
VIR0900	Egypt	Lebanon
VIR0905	Iran	Central Asia
VIR0906	Iran	Central Asia
VIR0914	Iran	Central Asia
VIR0915	Iran	Central Asia
VIR0917	Iran	Central Asia
VIR0918	Iran	Central Asia
VIR0919	Iran	Central Asia
VIR0920	Iran	Central Asia
VIR0923	India	India
VIR0929	India	India
VIR0930	India	India
VIR0931	India	India
VIR0932	India	India
VIR0933	India	India
VIR0934	India	India
VIR0935	India	India
VIR0936	India	India
VIR0940	India	India
VIR0941	India	India
VIR0943	India	India
VIR0944	India	India
VIR0945	India	India
VIR0947	India	India
VIR0957	Iran	Central Asia
VIR0958	India	India
VIR0960	India	India
VIR0961	India	India
VIR0962	India	India
VIR0963	India	India
VIR0965	India	India
VIR0967	India	India
VIR0973	Bangladesh	India
VIR0983	India	India
VIR0985	India	India
VIR0990	India	India
VIR0991	India	India
VIR0992	India	India
VIR0994	India	India
VIR0999	India	India
VIR1001	India	India
VIR1002	India	India
VIR1003	India	India
VIR1005	India	India
VIR1007	India	India
VIR1008	India	India
VIR1009	India	India
VIR1010	India	India
VIR1011	India	India
VIR1012	India	India
VIR1013	India	India
VIR1014	India	India
VIR1016	India	India
VIR1019	India	India
VE0154_1029	Ethiopia	Ethiopia
VIR1032	India	India
VIR1033	India	India
VIR1039	Pakistan	India
VIR1171	Ukraine	Turkey
VIR1179	Russia (European)	Turkey
VIR1190	Russia (European)	Turkey
VE0155_1210	Ethiopia	Ethiopia
VE0156_1211	Ethiopia	Ethiopia
VIR1214	Tajikistan	Central Asia
VIR1230	Moldova	Turkey
VIR1243	Russia (European)	Turkey
VIR1252	Uzbekistan	Central Asia
VIR1286	Russia (European)	Turkey
VE0157_1404	Ethiopia	Ethiopia
VE0158_1405	Ethiopia	Ethiopia
VE0159_1406	Ethiopia	Ethiopia
VE0161_1411	Ethiopia	Ethiopia
VE0162_1412	Ethiopia	Ethiopia
VE0163_1413	Ethiopia	Ethiopia
VE0164_1417	Ethiopia	Ethiopia
VE0165_1423	Ethiopia	Ethiopia
VIR1481	Russia (European)	Turkey
VT0055_1558	Turkey	Turkey
VE0167_1583	Ethiopia	Ethiopia
VE0168_1584	Ethiopia	Ethiopia
VE0169_1586	Ethiopia	Ethiopia
VE0170_2178	Ethiopia	Ethiopia
VIR2296	Syria	Lebanon
VT0056_2340	Turkey	Turkey
VT0057_2341	Turkey	Turkey
VT0058_2374	Turkey	Turkey
VT0059_2394	Turkey	Turkey
VT0060_2399	Turkey	Turkey
VT0061_2412	Turkey	Turkey
VT0062_2413	Turkey	Turkey
VT0063_2438	Turkey	Turkey
VT0065_2493	Turkey	Turkey
VE0172_3036	Ethiopia	Ethiopia
VT0066_3055	Turkey	Turkey
VT0068_3083	Turkey	Turkey
VT0071_3200	Turkey	Turkey
VT0072_3264	Turkey	Turkey
VT0073_3271	Turkey	Turkey
VT0075_3273	Turkey	Turkey
VT0076_3274	Turkey	Turkey
VT0077_3275	Turkey	Turkey
VT0078_3293	Turkey	Turkey
VT0081_3298	Turkey	Turkey
VT0083_3428	Turkey	Turkey
VT0084_3438	Turkey	Turkey
VT0085_3439	Turkey	Turkey
VT0087_3442	Turkey	Turkey
VE0173_3461	Ethiopia	Ethiopia
VT0088_3462	Turkey	Turkey
VT0089_3473	Turkey	Turkey
VT0091_3516	Turkey	Turkey
VT0092_3517	Turkey	Turkey
VT0094_3519	Turkey	Turkey
VT0096_3521	Turkey	Turkey
VT0098_3529	Turkey	Turkey
VT0099_3530	Turkey	Turkey
VT0100_3563	Turkey	Turkey
VT0101_3570	Turkey	Turkey
VT0102_3571	Turkey	Turkey
VT0103_3572	Turkey	Turkey
VE0174_3587	Ethiopia	Ethiopia
VT0104_3593	Turkey	Turkey
VT0105_3594	Turkey	Turkey
VT0106_3595	Turkey	Turkey
VT0108_3597	Turkey	Turkey
VT0109_3598	Turkey	Turkey
VIR455a	Algeria	Morocco
VIR455b	Algeria	Morocco
