# Supplementary material for: Genomic Analysis of Vavilov’s Historic Chickpea Landraces Reveals Footprints of Environmental and Human Selection
Source: Int J Mol Sci. 2020 May 31;21(11):3952. doi: 10.3390/ijms21113952 (PMC7313079; doi:10.3390/ijms21113952)
Supplement: Supplementary file 1 [file ijms-21-03952-s001.zip › TableS7.xlsx]

## Sheet: SNPs annotation
Type	Genes	Genes Positions	Effect	LD-block position	Genes in LD-block	SNP Position	Chromosome	SnpWeight	FDR	Phenotype
8PCs	Ca_00277,Ca_00278,intergenic_region	2214932-2218420,2218758-2220563,-	EFF=downstream_gene_variant(MODIFIER||280|c.*2244G>A|747|Gene_Ca_00277|protein_coding|CODING|Ca_00277||A),downstream_gene_variant(MODIFIER||58|c.*1806C>T|601|Gene_Ca_00278|protein_coding|CODING|Ca_00278||A),intergenic_region(MODIFIER||||||||||A)	2218700-2225735	Ca_00278	2218700	1	-2.77133275018	0.0483414705945748	Plant weight without pods
	intergenic_region	-	EFF=intergenic_region(MODIFIER||||||||||A)	13509382-13699033	Ca_14118,Ca_14119,Ca_14120,Ca_14121,Ca_14122,Ca_14123,Ca_14124,Ca_14125,Ca_14126,Ca_14127,Ca_14128,Ca_14129,Ca_14130,Ca_14131,Ca_14132,Ca_14133,Ca_14134,Ca_14135	13526551	1	0.359348466587	0.0344772458246288	Pod width
	intergenic_region	-	EFF=intergenic_region(MODIFIER||||||||||C)	13509382-13699033	Ca_14118,Ca_14119,Ca_14120,Ca_14121,Ca_14122,Ca_14123,Ca_14124,Ca_14125,Ca_14126,Ca_14127,Ca_14128,Ca_14129,Ca_14130,Ca_14131,Ca_14132,Ca_14133,Ca_14134,Ca_14135	13526561	1	0.359348466587	0.0344772458246288	PDW2016
	Ca_14129,intergenic_region	13634855-13643444,-	EFF=upstream_gene_variant(MODIFIER||1693|c.-1G>T|581|Gene_Ca_14129|protein_coding|CODING|Ca_14129||T),intergenic_region(MODIFIER||||||||||T)	13509382-13699033	Ca_14118,Ca_14119,Ca_14120,Ca_14121,Ca_14122,Ca_14123,Ca_14124,Ca_14125,Ca_14126,Ca_14127,Ca_14128,Ca_14129,Ca_14130,Ca_14131,Ca_14132,Ca_14133,Ca_14134,Ca_14135	13633162	1	0.36229534899	0.0113277748810787	PDW2016
	Ca_10509,Ca_10508,intergenic_region	3502263-3504496,3509229-3510575,-	EFF=upstream_gene_variant(MODIFIER||570|c.-1A>C|199|Gene_Ca_10509|protein_coding|CODING|Ca_10509||G),downstream_gene_variant(MODIFIER||4163|c.*693A>C|230|Gene_Ca_10508|protein_coding|CODING|Ca_10508||G),intergenic_region(MODIFIER||||||||||G)	-	-	3505066	2	0.167155048292	0.035230109134041	Flower colour
	Ca_10489,Ca_10487,Ca_10488	3734966-3736818,3742547-3744746,3737810-3741056	EFF=upstream_gene_variant(MODIFIER||2436|c.-1G>A|246|Gene_Ca_10489|protein_coding|CODING|Ca_10489||T),downstream_gene_variant(MODIFIER||3293|c.*528G>A|175|Gene_Ca_10487|protein_coding|CODING|Ca_10487||T),intron_variant(MODIFIER|||c.469-122G>A|340|Gene_Ca_10488|protein_coding|CODING|Ca_10488|3|T)	-	-	3739254	2	0.149377590591	0.035230109134041	FloColAv
	Ca_16015	17138165-17164751	EFF=intron_variant(MODIFIER|||c.1818+54A>T|1054|Gene_Ca_16015|protein_coding|CODING|Ca_16015|15|T)	-	-	17161867	2	-2.29098199631	0.0440494330080363	Plant weight without pods
	Ca_16015	17138165-17164751	EFF=intron_variant(MODIFIER|||c.1818+54A>T|1054|Gene_Ca_16015|protein_coding|CODING|Ca_16015|15|T)	-	-	17161867	2	-1.89019161353	0.0184228588304362	Isothermality
	Ca_16015	17138165-17164751	EFF=intron_variant(MODIFIER|||c.1818+54A>T|1054|Gene_Ca_16015|protein_coding|CODING|Ca_16015|15|T)	-	-	17161867	2	9.72032160969	0.0223601870110187	Mean temperature of warmest quarter
	Ca_16015	17138165-17164751	EFF=intron_variant(MODIFIER|||c.1819-64C>A|1054|Gene_Ca_16015|protein_coding|CODING|Ca_16015|15|A)	-	-	17161879	2	4.48401940153	0.0335844326617094	Isothermality
	Ca_16015	17138165-17164751	EFF=intron_variant(MODIFIER|||c.1819-59T>C|1054|Gene_Ca_16015|protein_coding|CODING|Ca_16015|15|C)	-	-	17161884	2	-2.00776671268	0.0184228588304362	Isothermality
	Ca_17808,Ca_17809	32139718-32148028,32135649-32138874	EFF=synonymous_variant(LOW|SILENT|gcT/gcA|p.Ala262Ala/c.786T>A|763|Gene_Ca_17808|protein_coding|CODING|Ca_17808|7|T),downstream_gene_variant(MODIFIER||3970|c.*585A>T|194|Gene_Ca_17809|protein_coding|CODING|Ca_17809||T)	32142844-32154998	Ca_17808	32142844	2	-0.182091851453	0.0489475260238624	Flower colour
	Ca_09764,Ca_09765	35894648-35899486,35900476-35907508	EFF=downstream_gene_variant(MODIFIER||1696|c.*2370T>A|789|Gene_Ca_09764|protein_coding|CODING|Ca_09764||A),intron_variant(MODIFIER|||c.261-320T>A|479|Gene_Ca_09765|protein_coding|CODING|Ca_09765|2|A)	35901139-35901182	Ca_09765,Ca_09765	35901182	2	0.161292000078	0.0489475260238624	FloColAv
	Ca_09772,Ca_09773	35972760-35986890,35988041-35994623	EFF=missense_variant(MODERATE|MISSENSE|agT/agA|p.Ser1466Arg/c.4398T>A|1912|Gene_Ca_09772|protein_coding|CODING|Ca_09772|4|A),downstream_gene_variant(MODIFIER||4341|c.*5121A>T|1706|Gene_Ca_09773|protein_coding|CODING|Ca_09773||A)	-	-	35983700	2	0.146424443955	0.0211590723776622	FloColAv
	Ca_09778,Ca_09779	36029747-36033434,36037037-36038157	EFF=missense_variant(MODERATE|MISSENSE|Gca/Aca|p.Ala187Thr/c.559G>A|1024|Gene_Ca_09778|protein_coding|CODING|Ca_09778|2|T),upstream_gene_variant(MODIFIER||4774|c.-1C>T|265|Gene_Ca_09779|protein_coding|CODING|Ca_09779||T)	36008104-36068304	Ca_09775,Ca_09776,Ca_09777,Ca_09778,Ca_09779,Ca_09780,Ca_09781,Ca_09782,Ca_09783,Ca_09784	36032263	2	0.148419726825	0.0489475260238624	FloColAv
	Ca_19358,intergenic_region	10859806-10861227,-	EFF=upstream_gene_variant(MODIFIER||4483|c.-1C>T|182|Gene_Ca_19358|protein_coding|CODING|Ca_19358||T),intergenic_region(MODIFIER||||||||||T)	-	-	10855323	3	3.25976023506	0.0440494330080363	Plant weight without pods
	Ca_24619,Ca_24618,intergenic_region	17199138-17201142,17185687-17191898,-	EFF=upstream_gene_variant(MODIFIER||4475|c.-1C>T|284|Gene_Ca_24619|protein_coding|CODING|Ca_24619||T),downstream_gene_variant(MODIFIER||2765|c.*1161C>T|386|Gene_Ca_24618|protein_coding|CODING|Ca_24618||T),intergenic_region(MODIFIER||||||||||T)	-	-	17194663	3	12.699169207	0.00437786311741633	Mean diurnal range
	Ca_09418,intergenic_region	20132214-20132759,-	EFF=upstream_gene_variant(MODIFIER||1338|c.-1G>A|181|Gene_Ca_09418|protein_coding|CODING|Ca_09418||A),intergenic_region(MODIFIER||||||||||A)	-	-	20130876	3	61.1573532454	0.0258378987911351	Precipitation of warmest quarter
	Ca_09445,Ca_09446	20548140-20549907,20552049-20559362	EFF=synonymous_variant(LOW|SILENT|gtT/gtA|p.Val133Val/c.399T>A|500|Gene_Ca_09445|protein_coding|CODING|Ca_09445|1|T),downstream_gene_variant(MODIFIER||2540|c.*4557T>A|1518|Gene_Ca_09446|protein_coding|CODING|Ca_09446||T)	-	-	20549509	3	6.26353047322	0.047660912654521	Isothermality
	Ca_09445,Ca_09446	20548140-20549907,20552049-20559362	EFF=synonymous_variant(LOW|SILENT|gtT/gtA|p.Val133Val/c.399T>A|500|Gene_Ca_09445|protein_coding|CODING|Ca_09445|1|T),downstream_gene_variant(MODIFIER||2540|c.*4557T>A|1518|Gene_Ca_09446|protein_coding|CODING|Ca_09446||T)	-	-	20549509	3	12.497063052	0.00844765895318568	Mean diurnal range
	Ca_08101,Ca_08102	28092585-28097998,28088801-28089935	EFF=synonymous_variant(LOW|SILENT|tcG/tcA|p.Ser620Ser/c.1860G>A|1048|Gene_Ca_08101|protein_coding|CODING|Ca_08101|3|T),upstream_gene_variant(MODIFIER||4357|c.-1G>A|230|Gene_Ca_08102|protein_coding|CODING|Ca_08102||T)	-	-	28094292	3	2.54326279607	0.0105702236314964	Plant weight without pods
	Ca_07835,Ca_07834,Ca_07836,intergenic_region	2147495-2148490,2141415-2143262,2149255-2153505,-	EFF=upstream_gene_variant(MODIFIER||2413|c.-1T>G|168|Gene_Ca_07835|protein_coding|CODING|Ca_07835||G),downstream_gene_variant(MODIFIER||1820|c.*1533T>G|510|Gene_Ca_07834|protein_coding|CODING|Ca_07834||G),downstream_gene_variant(MODIFIER||4173|c.*1200A>C|399|Gene_Ca_07836|protein_coding|CODING|Ca_07836||G),intergenic_region(MODIFIER||||||||||G)	-	-	2145082	4	-0.19191157252	0.0140911281126138	Flower colour
	Ca_03783,Ca_03784	4728496-4734867,4722098-4725306	EFF=upstream_gene_variant(MODIFIER||3565|c.-1A>G|659|Gene_Ca_03783|protein_coding|CODING|Ca_03783||G),intron_variant(MODIFIER|||c.742-220A>G|298|Gene_Ca_03784|protein_coding|CODING|Ca_03784|9|G)	4629282-5073317	Ca_03793,Ca_03792,Ca_03791,Ca_03790,Ca_03789,Ca_03788,Ca_03787,Ca_03786,Ca_03785,Ca_03784,Ca_03783,Ca_03782,Ca_03781,Ca_03780,Ca_03779,Ca_03778,Ca_03777,Ca_03776,Ca_03775,Ca_03774,Ca_03773,Ca_03772,Ca_03771,Ca_03770,Ca_03769,Ca_03768,Ca_03767,Ca_03766,Ca_03765,Ca_03764,Ca_03763,Ca_03762,Ca_03761,Ca_03760,Ca_03759,Ca_03758,Ca_03757,Ca_03756,Ca_03755,Ca_03754,Ca_03753,Ca_03752,Ca_03751,Ca_03750,Ca_…	4724931	4	0.191159762177	0.035230109134041	FloColAv
	Ca_03781	4745538-4758091	EFF=synonymous_variant(LOW|SILENT|ctG/ctT|p.Leu82Leu/c.246G>T|805|Gene_Ca_03781|protein_coding|CODING|Ca_03781|1|A)	4629282-5073317	Ca_03793,Ca_03792,Ca_03791,Ca_03790,Ca_03789,Ca_03788,Ca_03787,Ca_03786,Ca_03785,Ca_03784,Ca_03783,Ca_03782,Ca_03781,Ca_03780,Ca_03779,Ca_03778,Ca_03777,Ca_03776,Ca_03775,Ca_03774,Ca_03773,Ca_03772,Ca_03771,Ca_03770,Ca_03769,Ca_03768,Ca_03767,Ca_03766,Ca_03765,Ca_03764,Ca_03763,Ca_03762,Ca_03761,Ca_03760,Ca_03759,Ca_03758,Ca_03757,Ca_03756,Ca_03755,Ca_03754,Ca_03753,Ca_03752,Ca_03751,Ca_03750,Ca_…	4757846	4	0.182272993789	0.0401148941157223	FloColAv
	Ca_03778	4786303-4807465	EFF=intron_variant(MODIFIER|||c.2262+401A>G|1469|Gene_Ca_03778|protein_coding|CODING|Ca_03778|13|C)	4629282-5073317	Ca_03793,Ca_03792,Ca_03791,Ca_03790,Ca_03789,Ca_03788,Ca_03787,Ca_03786,Ca_03785,Ca_03784,Ca_03783,Ca_03782,Ca_03781,Ca_03780,Ca_03779,Ca_03778,Ca_03777,Ca_03776,Ca_03775,Ca_03774,Ca_03773,Ca_03772,Ca_03771,Ca_03770,Ca_03769,Ca_03768,Ca_03767,Ca_03766,Ca_03765,Ca_03764,Ca_03763,Ca_03762,Ca_03761,Ca_03760,Ca_03759,Ca_03758,Ca_03757,Ca_03756,Ca_03755,Ca_03754,Ca_03753,Ca_03752,Ca_03751,Ca_03750,Ca_…	4796209	4	0.207402709952	0.0211590723776622	FloColAv
	Ca_03601,Ca_03600,intergenic_region	6390289-6394129,6398757-6400910,-	EFF=upstream_gene_variant(MODIFIER||4576|c.-1T>C|313|Gene_Ca_03601|protein_coding|CODING|Ca_03601||G),upstream_gene_variant(MODIFIER||52|c.-1A>G|717|Gene_Ca_03600|protein_coding|CODING|Ca_03600||G),intergenic_region(MODIFIER||||||||||G)	-	-	6398705	4	-0.144720143912	0.0495187134612336	FloColAv
	Ca_03423,Ca_03422	8095942-8096277,8099551-8102401	EFF=downstream_gene_variant(MODIFIER||4942|c.*336A>T|111|Gene_Ca_03423|protein_coding|CODING|Ca_03423||T),intron_variant(MODIFIER|||c.327-71T>A|483|Gene_Ca_03422|protein_coding|CODING|Ca_03422|1|T)	-	-	8101219	4	-0.170722108236	0.035230109134041	FloColAv
	Ca_08305	8164137-8165857	EFF=synonymous_variant(LOW|SILENT|ctT/ctC|p.Leu133Leu/c.399T>C|343|Gene_Ca_08305|protein_coding|CODING|Ca_08305|2|C)	-	-	8165224	4	2.24542441656	0.0440494330080363	Plant weight without pods
	Ca_14215	30947156-30949552	EFF=synonymous_variant(LOW|SILENT|tcG/tcA|p.Ser320Ser/c.960G>A|798|Gene_Ca_14215|protein_coding|CODING|Ca_14215|1|T)	30869364-31328672	Ca_14213,Ca_14214,Ca_14215,Ca_14216,Ca_14217,Ca_14218,Ca_14219,Ca_14220,Ca_14221,Ca_14222,Ca_14223,Ca_14224,Ca_14225,Ca_14226,Ca_14227,Ca_14228,Ca_14229,Ca_14230,Ca_14231	30948593	4	-7.2417638539	0.00336550181421545	WpWp2016
	Ca_14215	30947156-30949552	EFF=synonymous_variant(LOW|SILENT|tcG/tcA|p.Ser320Ser/c.960G>A|798|Gene_Ca_14215|protein_coding|CODING|Ca_14215|1|T)	30869364-31328672	Ca_14213,Ca_14214,Ca_14215,Ca_14216,Ca_14217,Ca_14218,Ca_14219,Ca_14220,Ca_14221,Ca_14222,Ca_14223,Ca_14224,Ca_14225,Ca_14226,Ca_14227,Ca_14228,Ca_14229,Ca_14230,Ca_14231	30948593	4	-12.2071916396	0.0443209013647321	Biological yield
	intergenic_region	-	EFF=intergenic_region(MODIFIER||||||||||T)	-	-	33967674	4	-6.82261260915	0.00731508675224075	Plant weight without pods
	intergenic_region	-	EFF=intergenic_region(MODIFIER||||||||||T)	-	-	33967674	4	-4.44946100756	0.00684674600551191	Seeds weight per plant
	intergenic_region	-	EFF=intergenic_region(MODIFIER||||||||||T)	-	-	33967674	4	-17.080060436	7.84264217064551e-05	Biological yield
	intergenic_region	-	EFF=intergenic_region(MODIFIER||||||||||T)	-	-	33967674	4	-9.40244952087	0.000285687582180625	PodsWeigth
	Ca_20364,intergenic_region	34022577-34024786,-	EFF=upstream_gene_variant(MODIFIER||3912|c.-1C>A|365|Gene_Ca_20364|protein_coding|CODING|Ca_20364||A),intergenic_region(MODIFIER||||||||||A)	-	-	34018665	4	-5.76977958675	0.0149431319651354	Plant weight without pods
	intergenic_region	-	EFF=intergenic_region(MODIFIER||||||||||G)	38625368-38976785	Ca_13102,Ca_13101,Ca_13100,Ca_13099,Ca_13098,Ca_13097,Ca_13096,Ca_13095,Ca_13094,Ca_13093,Ca_13092,Ca_13091,Ca_13090,Ca_13089,Ca_13088,Ca_13087,Ca_13086,Ca_13085,Ca_13084,Ca_13083,Ca_13082,Ca_13081	38687034	4	30.2871338669	0.0459817348186744	Precipitation of warmest quarter
	intergenic_region	-	EFF=intergenic_region(MODIFIER||||||||||G)	38625368-38976785	Ca_13102,Ca_13101,Ca_13100,Ca_13099,Ca_13098,Ca_13097,Ca_13096,Ca_13095,Ca_13094,Ca_13093,Ca_13092,Ca_13091,Ca_13090,Ca_13089,Ca_13088,Ca_13087,Ca_13086,Ca_13085,Ca_13084,Ca_13083,Ca_13082,Ca_13081	38688610	4	32.9268614852	0.0258378987911351	bio_18
	Ca_13098	38719930-38726818	EFF=synonymous_variant(LOW|SILENT|acC/acG|p.Thr85Thr/c.255C>G|433|Gene_Ca_13098|protein_coding|CODING|Ca_13098|1|C)	38625368-38976785	Ca_13102,Ca_13101,Ca_13100,Ca_13099,Ca_13098,Ca_13097,Ca_13096,Ca_13095,Ca_13094,Ca_13093,Ca_13092,Ca_13091,Ca_13090,Ca_13089,Ca_13088,Ca_13087,Ca_13086,Ca_13085,Ca_13084,Ca_13083,Ca_13082,Ca_13081	38726564	4	33.9419715416	0.0221584673151637	bio_18
	snRNA_005282,intergenic_region	-,-	EFF=upstream_gene_variant(MODIFIER||2576|||Gene_snRNA_005282||NON_CODING|snRNA_005282||A),intergenic_region(MODIFIER||||||||||A)	38625368-38976785	Ca_13102,Ca_13101,Ca_13100,Ca_13099,Ca_13098,Ca_13097,Ca_13096,Ca_13095,Ca_13094,Ca_13093,Ca_13092,Ca_13091,Ca_13090,Ca_13089,Ca_13088,Ca_13087,Ca_13086,Ca_13085,Ca_13084,Ca_13083,Ca_13082,Ca_13081	38846435	4	34.5532333804	0.0221584673151637	bio_18
	Ca_09149,Ca_09150,intergenic_region	44847754-44853436,44858051-44861918,-	EFF=upstream_gene_variant(MODIFIER||2532|c.-1A>G|420|Gene_Ca_09149|protein_coding|CODING|Ca_09149||C),downstream_gene_variant(MODIFIER||2083|c.*1080A>G|359|Gene_Ca_09150|protein_coding|CODING|Ca_09150||C),intergenic_region(MODIFIER||||||||||C)	44721695-45135959	Ca_09142,Ca_09143,Ca_09144,Ca_09145,Ca_09146,Ca_09147,Ca_09148,Ca_09149,Ca_09150,Ca_09151,Ca_09152,Ca_09153,Ca_09154,Ca_09155,Ca_09156,Ca_09157,Ca_09158,Ca_09159,Ca_09160,Ca_09161,Ca_09162,Ca_09163,Ca_09164,Ca_09165,Ca_09166,Ca_09167,Ca_09168,Ca_09169,Ca_09170,Ca_09171,Ca_09172,Ca_09173,Ca_09174,Ca_09175,Ca_09176	44855968	4	-0.171009918579	0.035230109134041	Flower colour
	intergenic_region	-	EFF=intergenic_region(MODIFIER||||||||||T)	-	-	23891945	5	3.2059809909	0.0105702236314964	Plant weight without pods
	Ca_10418,Ca_10419	2830114-2832722,2835252-2840887	EFF=upstream_gene_variant(MODIFIER||4697|c.-1A>G|522|Gene_Ca_10418|protein_coding|CODING|Ca_10418||C),intron_variant(MODIFIER|||c.392+671A>G|322|Gene_Ca_10419|protein_coding|CODING|Ca_10419|6|C)	2541669-3024335	Ca_10386,Ca_10387,Ca_10388,Ca_10389,Ca_10390,Ca_10391,Ca_10392,Ca_10393,Ca_10394,Ca_10395,Ca_10396,Ca_10397,Ca_10398,Ca_10399,Ca_10400,Ca_10401,Ca_10402,Ca_10403,Ca_10404,Ca_10405,Ca_10406,Ca_10407,Ca_10408,Ca_10409,Ca_10410,Ca_10411,Ca_10412,Ca_10413,Ca_10414,Ca_10415,Ca_10416,Ca_10417,Ca_10418,Ca_10419,Ca_10420,Ca_10421,Ca_10422,Ca_10423,Ca_10424,Ca_10425,Ca_10426,Ca_10427,Ca_10428,Ca_10429,Ca_…	2837419	6	9.96260907556	0.0487549557836972	Mean diurnal range
	Ca_10429,Ca_10428,intergenic_region	2912703-2913095,2904769-2905917,-	EFF=upstream_gene_variant(MODIFIER||3880|c.-1G>T|130|Gene_Ca_10429|protein_coding|CODING|Ca_10429||T),downstream_gene_variant(MODIFIER||2906|c.*726G>T|241|Gene_Ca_10428|protein_coding|CODING|Ca_10428||T),intergenic_region(MODIFIER||||||||||T)	2541669-3024335	Ca_10386,Ca_10387,Ca_10388,Ca_10389,Ca_10390,Ca_10391,Ca_10392,Ca_10393,Ca_10394,Ca_10395,Ca_10396,Ca_10397,Ca_10398,Ca_10399,Ca_10400,Ca_10401,Ca_10402,Ca_10403,Ca_10404,Ca_10405,Ca_10406,Ca_10407,Ca_10408,Ca_10409,Ca_10410,Ca_10411,Ca_10412,Ca_10413,Ca_10414,Ca_10415,Ca_10416,Ca_10417,Ca_10418,Ca_10419,Ca_10420,Ca_10421,Ca_10422,Ca_10423,Ca_10424,Ca_10425,Ca_10426,Ca_10427,Ca_10428,Ca_10429,Ca_…	2908823	6	6.71919044231	0.0335844326617094	Isothermality
	Ca_10429,Ca_10428,intergenic_region	2912703-2913095,2904769-2905917,-	EFF=upstream_gene_variant(MODIFIER||3880|c.-1G>T|130|Gene_Ca_10429|protein_coding|CODING|Ca_10429||T),downstream_gene_variant(MODIFIER||2906|c.*726G>T|241|Gene_Ca_10428|protein_coding|CODING|Ca_10428||T),intergenic_region(MODIFIER||||||||||T)	2541669-3024335	Ca_10386,Ca_10387,Ca_10388,Ca_10389,Ca_10390,Ca_10391,Ca_10392,Ca_10393,Ca_10394,Ca_10395,Ca_10396,Ca_10397,Ca_10398,Ca_10399,Ca_10400,Ca_10401,Ca_10402,Ca_10403,Ca_10404,Ca_10405,Ca_10406,Ca_10407,Ca_10408,Ca_10409,Ca_10410,Ca_10411,Ca_10412,Ca_10413,Ca_10414,Ca_10415,Ca_10416,Ca_10417,Ca_10418,Ca_10419,Ca_10420,Ca_10421,Ca_10422,Ca_10423,Ca_10424,Ca_10425,Ca_10426,Ca_10427,Ca_10428,Ca_10429,Ca_…	2908823	6	13.5336729813	0.00437786311741633	Mean diurnal range
	Ca_10443,intergenic_region	3024663-3030348,-	EFF=upstream_gene_variant(MODIFIER||471|c.-1C>T|544|Gene_Ca_10443|protein_coding|CODING|Ca_10443||T),intergenic_region(MODIFIER||||||||||T)	2541669-3024335	Ca_10386,Ca_10387,Ca_10388,Ca_10389,Ca_10390,Ca_10391,Ca_10392,Ca_10393,Ca_10394,Ca_10395,Ca_10396,Ca_10397,Ca_10398,Ca_10399,Ca_10400,Ca_10401,Ca_10402,Ca_10403,Ca_10404,Ca_10405,Ca_10406,Ca_10407,Ca_10408,Ca_10409,Ca_10410,Ca_10411,Ca_10412,Ca_10413,Ca_10414,Ca_10415,Ca_10416,Ca_10417,Ca_10418,Ca_10419,Ca_10420,Ca_10421,Ca_10422,Ca_10423,Ca_10424,Ca_10425,Ca_10426,Ca_10427,Ca_10428,Ca_10429,Ca_…	3024192	6	1.92540072542	0.00568823896358566	BegFloBegMatu
	Ca_10443,intergenic_region	3024663-3030348,-	EFF=upstream_gene_variant(MODIFIER||329|c.-1T>C|544|Gene_Ca_10443|protein_coding|CODING|Ca_10443||C),intergenic_region(MODIFIER||||||||||C)	2541669-3024335	Ca_10386,Ca_10387,Ca_10388,Ca_10389,Ca_10390,Ca_10391,Ca_10392,Ca_10393,Ca_10394,Ca_10395,Ca_10396,Ca_10397,Ca_10398,Ca_10399,Ca_10400,Ca_10401,Ca_10402,Ca_10403,Ca_10404,Ca_10405,Ca_10406,Ca_10407,Ca_10408,Ca_10409,Ca_10410,Ca_10411,Ca_10412,Ca_10413,Ca_10414,Ca_10415,Ca_10416,Ca_10417,Ca_10418,Ca_10419,Ca_10420,Ca_10421,Ca_10422,Ca_10423,Ca_10424,Ca_10425,Ca_10426,Ca_10427,Ca_10428,Ca_10429,Ca_…	3024334	6	7.69023972446	0.0487549557836972	Mean diurnal range
	Ca_10443,intergenic_region	3024663-3030348,-	EFF=upstream_gene_variant(MODIFIER||328|c.-1T>C|544|Gene_Ca_10443|protein_coding|CODING|Ca_10443||C),intergenic_region(MODIFIER||||||||||C)	2541669-3024335	Ca_10386,Ca_10387,Ca_10388,Ca_10389,Ca_10390,Ca_10391,Ca_10392,Ca_10393,Ca_10394,Ca_10395,Ca_10396,Ca_10397,Ca_10398,Ca_10399,Ca_10400,Ca_10401,Ca_10402,Ca_10403,Ca_10404,Ca_10405,Ca_10406,Ca_10407,Ca_10408,Ca_10409,Ca_10410,Ca_10411,Ca_10412,Ca_10413,Ca_10414,Ca_10415,Ca_10416,Ca_10417,Ca_10418,Ca_10419,Ca_10420,Ca_10421,Ca_10422,Ca_10423,Ca_10424,Ca_10425,Ca_10426,Ca_10427,Ca_10428,Ca_10429,Ca_…	3024335	6	7.69023972446	0.0487549557836972	bio_2
	intergenic_region	-	EFF=intergenic_region(MODIFIER||||||||||C)	-	-	24777978	6	36.5514153543	0.0221584673151637	Precipitation of warmest quarter
	Ca_17437,intergenic_region	57110969-57117208,-	EFF=upstream_gene_variant(MODIFIER||104|c.-1C>T|596|Gene_Ca_17437|protein_coding|CODING|Ca_17437||A),intergenic_region(MODIFIER||||||||||A)	-	-	57117312	6	0.221042540151	0.00606788146233101	Flower colour
	Ca_17437,intergenic_region	57110969-57117208,-	EFF=upstream_gene_variant(MODIFIER||104|c.-1C>T|596|Gene_Ca_17437|protein_coding|CODING|Ca_17437||A),intergenic_region(MODIFIER||||||||||A)	-	-	57117312	6	-0.264868924364	0.0268863531377999	Seed shape
	Ca_06787,Ca_06786,intergenic_region	5708526-5712934,5713366-5714268,-	EFF=downstream_gene_variant(MODIFIER||73|c.*1938C>T|645|Gene_Ca_06787|protein_coding|CODING|Ca_06787||T),downstream_gene_variant(MODIFIER||359|c.*507G>A|168|Gene_Ca_06786|protein_coding|CODING|Ca_06786||T),intergenic_region(MODIFIER||||||||||T)	5692148-6040924	Ca_06787,Ca_06786,Ca_06785,Ca_06784,Ca_06783,Ca_06782,Ca_06781,Ca_06780,Ca_06779,Ca_06778,Ca_06777,Ca_06776,Ca_06775,Ca_06774,Ca_06773,Ca_06772,Ca_06771,Ca_06770,Ca_06769,Ca_06768,Ca_06767,Ca_06766,Ca_06765,Ca_06764,Ca_06763,Ca_06762,Ca_06761,Ca_06760,Ca_06759,Ca_06758,Ca_06757,Ca_06756,Ca_06755	5713007	7	-0.565621693001	0.0344772458246288	Pod width
	Ca_06770,intergenic_region	5881213-5883786,-	EFF=downstream_gene_variant(MODIFIER||186|c.*558T>C|185|Gene_Ca_06770|protein_coding|CODING|Ca_06770||G),intergenic_region(MODIFIER||||||||||G)	5692148-6040924	Ca_06787,Ca_06786,Ca_06785,Ca_06784,Ca_06783,Ca_06782,Ca_06781,Ca_06780,Ca_06779,Ca_06778,Ca_06777,Ca_06776,Ca_06775,Ca_06774,Ca_06773,Ca_06772,Ca_06771,Ca_06770,Ca_06769,Ca_06768,Ca_06767,Ca_06766,Ca_06765,Ca_06764,Ca_06763,Ca_06762,Ca_06761,Ca_06760,Ca_06759,Ca_06758,Ca_06757,Ca_06756,Ca_06755	5881027	7	-0.533065137194	0.0481046163452373	PDW2016
	Ca_06755	6035253-6041627	EFF=intron_variant(MODIFIER|||c.1252-264A>G|772|Gene_Ca_06755|protein_coding|CODING|Ca_06755|5|C)	5692148-6040924	Ca_06787,Ca_06786,Ca_06785,Ca_06784,Ca_06783,Ca_06782,Ca_06781,Ca_06780,Ca_06779,Ca_06778,Ca_06777,Ca_06776,Ca_06775,Ca_06774,Ca_06773,Ca_06772,Ca_06771,Ca_06770,Ca_06769,Ca_06768,Ca_06767,Ca_06766,Ca_06765,Ca_06764,Ca_06763,Ca_06762,Ca_06761,Ca_06760,Ca_06759,Ca_06758,Ca_06757,Ca_06756,Ca_06755	6037614	7	-0.585050457537	0.0344772458246288	PDW2016
	Ca_06751,intergenic_region	6079807-6080217,-	EFF=upstream_gene_variant(MODIFIER||59|c.-1C>T|136|Gene_Ca_06751|protein_coding|CODING|Ca_06751||A),intergenic_region(MODIFIER||||||||||A)	6045262-6544932	Ca_06754,Ca_06753,Ca_06752,Ca_06751,Ca_06750,Ca_06749,Ca_06748,Ca_06747,Ca_06746,Ca_06745,Ca_06744,Ca_06743,Ca_06742,Ca_06741,Ca_06740,Ca_06739,Ca_06738,Ca_06737,Ca_06736,Ca_06735,Ca_06734,Ca_06733,Ca_06732,Ca_06731,Ca_06730,Ca_06729,Ca_06728,Ca_06727,Ca_06726,Ca_06725,Ca_06724,Ca_06723,Ca_06722,Ca_06721,Ca_06720,Ca_06719,Ca_06718,Ca_06717,Ca_06716,Ca_06715,Ca_06714,Ca_06713,Ca_06712,Ca_06711,Ca_…	6080276	7	-0.534564330397	0.0481046163452373	PDW2016
	Ca_23314,intergenic_region	30929035-30929319,-	EFF=downstream_gene_variant(MODIFIER||1460|c.*285G>T|94|Gene_Ca_23314|protein_coding|CODING|Ca_23314||T),intergenic_region(MODIFIER||||||||||T)	-	-	30930779	7	8.12071955016	0.0457601068727474	Number of seeds per plant
	Ca_23314,intergenic_region	30929035-30929319,-	EFF=downstream_gene_variant(MODIFIER||1460|c.*285G>T|94|Gene_Ca_23314|protein_coding|CODING|Ca_23314||T),intergenic_region(MODIFIER||||||||||T)	-	-	30930779	7	3.57096501684	0.00019967362126607	Plant weight without pods
	Ca_23314,intergenic_region	30929035-30929319,-	EFF=downstream_gene_variant(MODIFIER||1460|c.*285G>T|94|Gene_Ca_23314|protein_coding|CODING|Ca_23314||T),intergenic_region(MODIFIER||||||||||T)	-	-	30930779	7	1.72385144665	0.0437076240074272	Isothermality
	Ca_23314,intergenic_region	30929035-30929319,-	EFF=downstream_gene_variant(MODIFIER||1460|c.*285G>T|94|Gene_Ca_23314|protein_coding|CODING|Ca_23314||T),intergenic_region(MODIFIER||||||||||T)	-	-	30930779	7	2.0490250601	0.00684674600551191	Seeds weight per plant
	Ca_23314,intergenic_region	30929035-30929319,-	EFF=downstream_gene_variant(MODIFIER||1460|c.*285G>T|94|Gene_Ca_23314|protein_coding|CODING|Ca_23314||T),intergenic_region(MODIFIER||||||||||T)	-	-	30930779	7	7.38302626731	6.29736944933058e-05	Biological yield
	Ca_23314,intergenic_region	30929035-30929319,-	EFF=downstream_gene_variant(MODIFIER||1460|c.*285G>T|94|Gene_Ca_23314|protein_coding|CODING|Ca_23314||T),intergenic_region(MODIFIER||||||||||T)	-	-	30930779	7	3.67273868793	0.00731243001371454	PodsWeigth
	Ca_10070,Ca_10069,intergenic_region	31938618-31941025,31946645-31948223,-	EFF=downstream_gene_variant(MODIFIER||4278|c.*405T>C|134|Gene_Ca_10070|protein_coding|CODING|Ca_10070||C),downstream_gene_variant(MODIFIER||1342|c.*1002A>G|333|Gene_Ca_10069|protein_coding|CODING|Ca_10069||C),intergenic_region(MODIFIER||||||||||C)	-	-	31945303	7	2.49160263189	0.047660912654521	Isothermality
	Ca_16158,Ca_16159,intergenic_region	33331433-33336057,33338713-33341373,-	EFF=downstream_gene_variant(MODIFIER||1467|c.*1269T>C|422|Gene_Ca_16158|protein_coding|CODING|Ca_16158||C),downstream_gene_variant(MODIFIER||1189|c.*891A>G|296|Gene_Ca_16159|protein_coding|CODING|Ca_16159||C),intergenic_region(MODIFIER||||||||||C)	-	-	33337524	7	-2.60286625411	0.0335844326617094	bio_3
	Ca_16158,Ca_16159,intergenic_region	33331433-33336057,33338713-33341373,-	EFF=downstream_gene_variant(MODIFIER||1467|c.*1269T>C|422|Gene_Ca_16158|protein_coding|CODING|Ca_16158||C),downstream_gene_variant(MODIFIER||1189|c.*891A>G|296|Gene_Ca_16159|protein_coding|CODING|Ca_16159||C),intergenic_region(MODIFIER||||||||||C)	-	-	33337524	7	-18.8329430134	0.021369087502539	Mean temperature of coldest quarter
	Ca_16158,Ca_16159,intergenic_region	33331433-33336057,33338713-33341373,-	EFF=downstream_gene_variant(MODIFIER||1467|c.*1269T>C|422|Gene_Ca_16158|protein_coding|CODING|Ca_16158||C),downstream_gene_variant(MODIFIER||1189|c.*891A>G|296|Gene_Ca_16159|protein_coding|CODING|Ca_16159||C),intergenic_region(MODIFIER||||||||||C)	-	-	33337524	7	-17.1813060947	0.0311674167657439	Min temperature of coldest month
	Ca_16159,Ca_16158,Ca_16160	33338713-33341373,33331433-33336057,33344021-33344485	EFF=missense_variant(MODERATE|MISSENSE|cCt/cAt|p.Pro76His/c.227C>A|296|Gene_Ca_16159|protein_coding|CODING|Ca_16159|3|T),downstream_gene_variant(MODIFIER||4315|c.*1269G>T|422|Gene_Ca_16158|protein_coding|CODING|Ca_16158||T),downstream_gene_variant(MODIFIER||3649|c.*465C>A|154|Gene_Ca_16160|protein_coding|CODING|Ca_16160||T)	-	-	33340372	7	-2.40757022147	0.047660912654521	Isothermality
	Ca_16159,Ca_16158,Ca_16160	33338713-33341373,33331433-33336057,33344021-33344485	EFF=missense_variant(MODERATE|MISSENSE|cCt/cAt|p.Pro76His/c.227C>A|296|Gene_Ca_16159|protein_coding|CODING|Ca_16159|3|T),downstream_gene_variant(MODIFIER||4315|c.*1269G>T|422|Gene_Ca_16158|protein_coding|CODING|Ca_16158||T),downstream_gene_variant(MODIFIER||3649|c.*465C>A|154|Gene_Ca_16160|protein_coding|CODING|Ca_16160||T)	-	-	33340372	7	-17.6916673563	0.021369087502539	Mean temperature of coldest quarter
	Ca_16159,Ca_16158,Ca_16160	33338713-33341373,33331433-33336057,33344021-33344485	EFF=missense_variant(MODERATE|MISSENSE|cCt/cAt|p.Pro76His/c.227C>A|296|Gene_Ca_16159|protein_coding|CODING|Ca_16159|3|T),downstream_gene_variant(MODIFIER||4315|c.*1269G>T|422|Gene_Ca_16158|protein_coding|CODING|Ca_16158||T),downstream_gene_variant(MODIFIER||3649|c.*465C>A|154|Gene_Ca_16160|protein_coding|CODING|Ca_16160||T)	-	-	33340372	7	-16.4784737589	0.0311674167657439	Min temperature of coldest month
	snRNA_003955,snRNA_003957,Ca_16167	-,-,33453279-33461157	EFF=downstream_gene_variant(MODIFIER||4924|||Gene_snRNA_003955||NON_CODING|snRNA_003955||A),downstream_gene_variant(MODIFIER||4337|||Gene_snRNA_003957||NON_CODING|snRNA_003957||A),intron_variant(MODIFIER|||c.1996+213A>T|1500|Gene_Ca_16167|protein_coding|CODING|Ca_16167|6|A)	-	-	33457287	7	-2.67347086155	0.021851913179703	Isothermality
	snRNA_003955,snRNA_003957,Ca_16167	-,-,33453279-33461157	EFF=downstream_gene_variant(MODIFIER||4924|||Gene_snRNA_003955||NON_CODING|snRNA_003955||A),downstream_gene_variant(MODIFIER||4337|||Gene_snRNA_003957||NON_CODING|snRNA_003957||A),intron_variant(MODIFIER|||c.1996+213A>T|1500|Gene_Ca_16167|protein_coding|CODING|Ca_16167|6|A)	-	-	33457287	7	-17.61604351	0.021369087502539	Mean temperature of coldest quarter
	snRNA_003955,snRNA_003957,Ca_16167	-,-,33453279-33461157	EFF=downstream_gene_variant(MODIFIER||4924|||Gene_snRNA_003955||NON_CODING|snRNA_003955||A),downstream_gene_variant(MODIFIER||4337|||Gene_snRNA_003957||NON_CODING|snRNA_003957||A),intron_variant(MODIFIER|||c.1996+213A>T|1500|Gene_Ca_16167|protein_coding|CODING|Ca_16167|6|A)	-	-	33457287	7	-16.373119557	0.0311674167657439	Min temperature of coldest month
	intergenic_region	-	EFF=intergenic_region(MODIFIER||||||||||C)	-	-	42084987	7	17.6104001541	0.0220045709784046	Mean temperature of wettest quarter
	Ca_19470,intergenic_region	46715391-46721433,-	EFF=downstream_gene_variant(MODIFIER||3011|c.*1017G>A|338|Gene_Ca_19470|protein_coding|CODING|Ca_19470||T),intergenic_region(MODIFIER||||||||||T)	-	-	46712380	7	17.6865174679	0.037462533099913	bio_8
	Ca_11514,intergenic_region	8840477-8842471,-	EFF=upstream_gene_variant(MODIFIER||3334|c.-1A>G|664|Gene_Ca_11514|protein_coding|CODING|Ca_11514||G),intergenic_region(MODIFIER||||||||||G)	8837143-8858449	Ca_11514,Ca_11515,Ca_11516	8837143	8	3.27568401823	0.0149521453803706	Plant weight without pods
	Ca_11514,intergenic_region	8840477-8842471,-	EFF=upstream_gene_variant(MODIFIER||3332|c.-1T>G|664|Gene_Ca_11514|protein_coding|CODING|Ca_11514||G),intergenic_region(MODIFIER||||||||||G)	8837143-8858449	Ca_11514,Ca_11515,Ca_11516	8837145	8	3.27568401823	0.0149521453803706	WpWp2016
	Ca_11516,tRNA_0254,Ca_11515	8855705-8856217,-,8853543-8853869	EFF=missense_variant(MODERATE|MISSENSE|gGa/gAa|p.Gly108Glu/c.323G>A|170|Gene_Ca_11516|protein_coding|CODING|Ca_11516|1|T),upstream_gene_variant(MODIFIER||4536|||Gene_tRNA_0254||NON_CODING|tRNA_0254||T),downstream_gene_variant(MODIFIER||2026|c.*327C>T|108|Gene_Ca_11515|protein_coding|CODING|Ca_11515||T)	8837143-8858449	Ca_11514,Ca_11515,Ca_11516	8855895	8	3.35914629388	0.0128288397928934	WpWp2016
	Ca_11516,tRNA_0254,Ca_11515,intergenic_region	8855705-8856217,-,8853543-8853869,-	EFF=upstream_gene_variant(MODIFIER||2200|c.-1A>G|170|Gene_Ca_11516|protein_coding|CODING|Ca_11516||C),upstream_gene_variant(MODIFIER||2014|||Gene_tRNA_0254||NON_CODING|tRNA_0254||C),downstream_gene_variant(MODIFIER||4548|c.*327T>C|108|Gene_Ca_11515|protein_coding|CODING|Ca_11515||C),intergenic_region(MODIFIER||||||||||C)	8837143-8858449	Ca_11514,Ca_11515,Ca_11516	8858417	8	3.36480880931	0.0149431319651354	WpWp2016
	Ca_11516,tRNA_0254,Ca_11515,intergenic_region	8855705-8856217,-,8853543-8853869,-	EFF=upstream_gene_variant(MODIFIER||2232|c.-1C>G|170|Gene_Ca_11516|protein_coding|CODING|Ca_11516||C),upstream_gene_variant(MODIFIER||1982|||Gene_tRNA_0254||NON_CODING|tRNA_0254||C),downstream_gene_variant(MODIFIER||4580|c.*327G>C|108|Gene_Ca_11515|protein_coding|CODING|Ca_11515||C),intergenic_region(MODIFIER||||||||||C)	8837143-8858449	Ca_11514,Ca_11515,Ca_11516	8858449	8	3.39824985153	0.0142390500387445	WpWp2016
	Ca_11524	8931865-8938608	EFF=intron_variant(MODIFIER|||c.773+13A>T|657|Gene_Ca_11524|protein_coding|CODING|Ca_11524|5|A)	-	-	8934719	8	3.86997639241	0.00682997817963363	WpWp2016
	intergenic_region	-	EFF=intergenic_region(MODIFIER||||||||||T)	9087442-9098790	Ca_11532,Ca_11533	9087442	8	3.81436879253	0.00965921350088989	WpWp2016
	Ca_11532,Ca_11533	9093326-9095416,9097268-9101360	EFF=upstream_gene_variant(MODIFIER||3374|c.-1A>G|292|Gene_Ca_11532|protein_coding|CODING|Ca_11532||C),intron_variant(MODIFIER|||c.730-62T>C|788|Gene_Ca_11533|protein_coding|CODING|Ca_11533|1|C)	9087442-9098790	Ca_11532,Ca_11533	9098790	8	4.46350831902	0.00134213881221534	WpWp2016
	Ca_11532,Ca_11533	9093326-9095416,9097268-9101360	EFF=upstream_gene_variant(MODIFIER||3374|c.-1A>G|292|Gene_Ca_11532|protein_coding|CODING|Ca_11532||C),intron_variant(MODIFIER|||c.730-62T>C|788|Gene_Ca_11533|protein_coding|CODING|Ca_11533|1|C)	9087442-9098790	Ca_11532,Ca_11533	9098790	8	6.98861665256	0.0425718085047108	Biological yield
	Ca_11533,Ca_11532	9097268-9101360,9093326-9095416	EFF=missense_variant(MODERATE|MISSENSE|gGa/gAa|p.Gly462Glu/c.1385G>A|788|Gene_Ca_11533|protein_coding|CODING|Ca_11533|5|A),upstream_gene_variant(MODIFIER||4877|c.-1C>T|292|Gene_Ca_11532|protein_coding|CODING|Ca_11532||A)	-	-	9100293	8	3.51693314906	0.0100376566430589	Plant weight without pods
	Ca_11539	9151680-9159194	EFF=intron_variant(MODIFIER|||c.864+34C>T|700|Gene_Ca_11539|protein_coding|CODING|Ca_11539|6|A)	9156650-9213312	Ca_11539,Ca_11540,Ca_11541	9156650	8	3.92074903033	0.00752778048276832	WpWp2016
	Ca_11539	9151680-9159194	EFF=intron_variant(MODIFIER|||c.864+28A>T|700|Gene_Ca_11539|protein_coding|CODING|Ca_11539|6|A)	9156650-9213312	Ca_11539,Ca_11540,Ca_11541	9156656	8	3.73151496163	0.00979712594588561	WpWp2016
	Ca_11539	9151680-9159194	EFF=intron_variant(MODIFIER|||c.864+26A>T|700|Gene_Ca_11539|protein_coding|CODING|Ca_11539|6|A)	9156650-9213312	Ca_11539,Ca_11540,Ca_11541	9156658	8	3.73151496163	0.00979712594588561	WpWp2016
	Ca_11542,intergenic_region	9218185-9219003,-	EFF=upstream_gene_variant(MODIFIER||4938|c.-1A>G|272|Gene_Ca_11542|protein_coding|CODING|Ca_11542||G),intergenic_region(MODIFIER||||||||||G)	9156650-9213312	Ca_11539,Ca_11540,Ca_11541	9213247	8	3.67049163691	0.00860745208373852	WpWp2016
	Ca_11542,intergenic_region	9218185-9219003,-	EFF=upstream_gene_variant(MODIFIER||4934|c.-1C>G|272|Gene_Ca_11542|protein_coding|CODING|Ca_11542||G),intergenic_region(MODIFIER||||||||||G)	9156650-9213312	Ca_11539,Ca_11540,Ca_11541	9213251	8	3.69508643447	0.00860745208373852	WpWp2016
	Ca_11542,intergenic_region	9218185-9219003,-	EFF=upstream_gene_variant(MODIFIER||4913|c.-1A>T|272|Gene_Ca_11542|protein_coding|CODING|Ca_11542||T),intergenic_region(MODIFIER||||||||||T)	9156650-9213312	Ca_11539,Ca_11540,Ca_11541	9213272	8	3.68968248214	0.00860745208373852	WpWp2016
	Ca_11542,intergenic_region	9218185-9219003,-	EFF=upstream_gene_variant(MODIFIER||4884|c.-1C>A|272|Gene_Ca_11542|protein_coding|CODING|Ca_11542||A),intergenic_region(MODIFIER||||||||||A)	9156650-9213312	Ca_11539,Ca_11540,Ca_11541	9213301	8	3.64356218308	0.00882023098286231	WpWp2016
	Ca_11542,intergenic_region	9218185-9219003,-	EFF=upstream_gene_variant(MODIFIER||4873|c.-1T>C|272|Gene_Ca_11542|protein_coding|CODING|Ca_11542||C),intergenic_region(MODIFIER||||||||||C)	9156650-9213312	Ca_11539,Ca_11540,Ca_11541	9213312	8	3.60623444849	0.00935879745832397	WpWp2016
	Ca_18423,intergenic_region	10309116-10309580,-	EFF=downstream_gene_variant(MODIFIER||4872|c.*465T>G|154|Gene_Ca_18423|protein_coding|CODING|Ca_18423||G),intergenic_region(MODIFIER||||||||||G)	-	-	10314452	8	3.12962137856	0.00421085254059799	WpWp2016
	Ca_18423,intergenic_region	10309116-10309580,-	EFF=downstream_gene_variant(MODIFIER||4872|c.*465T>G|154|Gene_Ca_18423|protein_coding|CODING|Ca_18423||G),intergenic_region(MODIFIER||||||||||G)	-	-	10314452	8	5.87949595235	0.0104476339177432	Biological yield
8PCs+2PCoAs	Ca_09607,Ca_09605,Ca_09606	7718851-7723235,7731132-7731704,7725906-7728192	EFF=downstream_gene_variant(MODIFIER||4663|c.*1056C>G|351|Gene_Ca_09607|protein_coding|CODING|Ca_09607||G),downstream_gene_variant(MODIFIER||3234|c.*573G>C|190|Gene_Ca_09605|protein_coding|CODING|Ca_09605||G),intron_variant(MODIFIER|||c.250-42G>C|386|Gene_Ca_09606|protein_coding|CODING|Ca_09606|1|G)	7700194-7983663	Ca_09610,Ca_09609,Ca_09608,Ca_09607,Ca_09606,Ca_09605,Ca_09604,Ca_09603,Ca_09602,Ca_09601,Ca_09600,Ca_09599,Ca_09598,Ca_09597,Ca_09596,Ca_09595,Ca_09594,Ca_09593,Ca_09592,Ca_09591,Ca_09590,Ca_09589,Ca_09588,Ca_09587,Ca_09586,Ca_09585,Ca_09584,Ca_09583,Ca_09582,Ca_09581,Ca_09580,Ca_09579,Ca_09578,Ca_09577	7727898	6	0.658905312983	0.0430675319583441	Pod length
	Ca_09597,intergenic_region	7805741-7806044,-	EFF=upstream_gene_variant(MODIFIER||412|c.-1G>A|71|Gene_Ca_09597|protein_coding|CODING|Ca_09597||T),intergenic_region(MODIFIER||||||||||T)	7700194-7983663	Ca_09610,Ca_09609,Ca_09608,Ca_09607,Ca_09606,Ca_09605,Ca_09604,Ca_09603,Ca_09602,Ca_09601,Ca_09600,Ca_09599,Ca_09598,Ca_09597,Ca_09596,Ca_09595,Ca_09594,Ca_09593,Ca_09592,Ca_09591,Ca_09590,Ca_09589,Ca_09588,Ca_09587,Ca_09586,Ca_09585,Ca_09584,Ca_09583,Ca_09582,Ca_09581,Ca_09580,Ca_09579,Ca_09578,Ca_09577	7806456	6	0.601576485269	0.0430675319583441
	Ca_09586,tRNA_0381	7894343-7898451,-	EFF=synonymous_variant(LOW|SILENT|aaT/aaC|p.Asn244Asn/c.732T>C|510|Gene_Ca_09586|protein_coding|CODING|Ca_09586|5|G),downstream_gene_variant(MODIFIER||4455|||Gene_tRNA_0381||NON_CODING|tRNA_0381||G)	7700194-7983663	Ca_09610,Ca_09609,Ca_09608,Ca_09607,Ca_09606,Ca_09605,Ca_09604,Ca_09603,Ca_09602,Ca_09601,Ca_09600,Ca_09599,Ca_09598,Ca_09597,Ca_09596,Ca_09595,Ca_09594,Ca_09593,Ca_09592,Ca_09591,Ca_09590,Ca_09589,Ca_09588,Ca_09587,Ca_09586,Ca_09585,Ca_09584,Ca_09583,Ca_09582,Ca_09581,Ca_09580,Ca_09579,Ca_09578,Ca_09577	7895806	6	0.659015556749	0.0430675319583441
	Ca_09577	7983136-7985505	EFF=intron_variant(MODIFIER|||c.385-23C>T|333|Gene_Ca_09577|protein_coding|CODING|Ca_09577|2|T)	7700194-7983663	Ca_09610,Ca_09609,Ca_09608,Ca_09607,Ca_09606,Ca_09605,Ca_09604,Ca_09603,Ca_09602,Ca_09601,Ca_09600,Ca_09599,Ca_09598,Ca_09597,Ca_09596,Ca_09595,Ca_09594,Ca_09593,Ca_09592,Ca_09591,Ca_09590,Ca_09589,Ca_09588,Ca_09587,Ca_09586,Ca_09585,Ca_09584,Ca_09583,Ca_09582,Ca_09581,Ca_09580,Ca_09579,Ca_09578,Ca_09577	7983663	6	0.612733520427	0.0430675319583441
	Ca_09563,Ca_09564,tRNA_0380	8080604-8084835,8075620-8078299,-	EFF=missense_variant(MODERATE|MISSENSE|tAc/tTc|p.Tyr85Phe/c.254A>T|415|Gene_Ca_09563|protein_coding|CODING|Ca_09563|1|T),downstream_gene_variant(MODIFIER||2558|c.*624A>T|207|Gene_Ca_09564|protein_coding|CODING|Ca_09564||T),downstream_gene_variant(MODIFIER||610|||Gene_tRNA_0380||NON_CODING|tRNA_0380||T)	8030248-8096871	Ca_09570,Ca_09569,Ca_09568,Ca_09567,Ca_09566,Ca_09565,Ca_09564,Ca_09563,Ca_09562,Ca_09561	8080857	6	0.556390833231	0.0430675319583441
			EFF=missense_variant(MODERATE|MISSENSE|aCt/aGt|p.Thr86Ser/c.257C>G|415|Gene_Ca_09563|protein_coding|CODING|Ca_09563|1|G),downstream_gene_variant(MODIFIER||2561|c.*624C>G|207|Gene_Ca_09564|protein_coding|CODING|Ca_09564||G),downstream_gene_variant(MODIFIER||613|||Gene_tRNA_0380||NON_CODING|tRNA_0380||G)	8030248-8096871	Ca_09570,Ca_09569,Ca_09568,Ca_09567,Ca_09566,Ca_09565,Ca_09564,Ca_09563,Ca_09562,Ca_09561	8080860	6	0.556390833231	0.0430675319583441
	Ca_09560,Ca_09562,Ca_09561	8101326-8104268,8087231-8093131,8094035-8098051	EFF=upstream_gene_variant(MODIFIER||4455|c.-1T>A|168|Gene_Ca_09560|protein_coding|CODING|Ca_09560||A),downstream_gene_variant(MODIFIER||3740|c.*3120T>A|1039|Gene_Ca_09562|protein_coding|CODING|Ca_09562||A),intron_variant(MODIFIER|||c.118-591A>T|324|Gene_Ca_09561|protein_coding|CODING|Ca_09561|1|A)	8030248-8096871	Ca_09570,Ca_09569,Ca_09568,Ca_09567,Ca_09566,Ca_09565,Ca_09564,Ca_09563,Ca_09562,Ca_09561	8096871	6	0.607688637007	0.0430675319583441
	Ca_09555,Ca_09556	8135053-8142254,8131609-8134465	EFF=downstream_gene_variant(MODIFIER||2208|c.*2544T>C|847|Gene_Ca_09555|protein_coding|CODING|Ca_09555||G),intron_variant(MODIFIER|||c.549+75A>G|342|Gene_Ca_09556|protein_coding|CODING|Ca_09556|2|G)	-	-	8132845	6	0.588130937741	0.0486497891431874
	Ca_16686,intergenic_region	26450198-26453064,-	EFF=downstream_gene_variant(MODIFIER||4510|c.*2175C>A|724|Gene_Ca_16686|protein_coding|CODING|Ca_16686||A),intergenic_region(MODIFIER||||||||||A)	26457574-26457601	-	26457574	6	0.519070574839	0.0430675319583441
	intergenic_region	-	EFF=intergenic_region(MODIFIER||||||||||C)	-	-	15929893	7	-0.529676736397	0.0430675319583441
	intergenic_region	-	EFF=intergenic_region(MODIFIER||||||||||C)	32170699-32375957	Ca_10054,Ca_10053,Ca_10052,Ca_10051,Ca_10050,Ca_10049,Ca_10048,Ca_10047,Ca_10046,Ca_10045,Ca_10044,Ca_10043,Ca_10042	32170699	7	-0.655981765018	0.0430675319583441
	intergenic_region	-	EFF=intergenic_region(MODIFIER||||||||||T)	32170699-32375957	Ca_10054,Ca_10053,Ca_10052,Ca_10051,Ca_10050,Ca_10049,Ca_10048,Ca_10047,Ca_10046,Ca_10045,Ca_10044,Ca_10043,Ca_10042	32170702	7	-0.655981765018	0.0430675319583441
	Ca_20269,intergenic_region	40657971-40659533,-	EFF=downstream_gene_variant(MODIFIER||3010|c.*558G>A|185|Gene_Ca_20269|protein_coding|CODING|Ca_20269||A),intergenic_region(MODIFIER||||||||||A)	-	-	40662543	7	-0.219445140422	0.0148846540288588	The nature of the branching (secondary branches)
	intergenic_region	-	EFF=intergenic_region(MODIFIER||||||||||G)	-	-	41540186	7	-0.194533725475	0.0498333768644757

## Sheet: genes annotation
Gene	Gene position	Chromosome	Domain	GO ontology term	KEGG annotation	Swissprot annotation	TrEMBL annotation
Ca_00277	2214932-2218420	1	-	-	-	Y4498_ARATH Uncharacterized protein At4g04980 OS=Arabidopsis thaliana GN=At4g04980 PE=2 SV=1	A2Q4Q2_MEDTR Phosphoinositide-binding clathrin adaptor, N-terminal; Wiscott-Aldrich syndrome, C-terminal OS=Medicago truncatula GN=MtrDRAFT_AC157507g11v2 PE=4 SV=1
Ca_00278	2218758-2220563	1	IPR002227; Tyrosinase IPR022739; Polyphenol oxidase, central domain IPR022740; Polyphenol oxidase, C-terminal	GO:0004097; catechol oxidase activity; Molecular Function GO:0008152; metabolic process; Biological Process GO:0016491; oxidoreductase activity; Molecular Function GO:0055114; oxidation-reduction process; Biological Process	hypothetical protein LOC100256583; K00422 polyphenol oxidase [EC:1.10.3.1]	PPO_VICFA Polyphenol oxidase A1, chloroplastic OS=Vicia faba PE=1 SV=1	A2Q4Q3_MEDTR Polyphenol oxidase OS=Medicago truncatula GN=MTR_2g013010 PE=4 SV=1
Ca_14129	13634855-13643444	1	IPR005612; CCAAT-binding factor	-	-	NOC4L_MOUSE Nucleolar complex protein 4 homolog OS=Mus musculus GN=Noc4l PE=2 SV=1	G7K1U1_MEDTR Nucleolar complex protein-like protein OS=Medicago truncatula GN=MTR_5g078780 PE=4 SV=1
Ca_14118	13512160-13513584	1	IPR003480; Transferase	GO:0016747; transferase activity, transferring acyl groups other than amino-acyl groups; Molecular Function	-	ANTA_GENTR Anthocyanin 5-aromatic acyltransferase OS=Gentiana triflora PE=1 SV=1	G7IRP3_MEDTR Anthocyanin 5-aromatic acyltransferase OS=Medicago truncatula GN=MTR_2g089670 PE=4 SV=1
Ca_14119	13535111-13536490	1	IPR001005; SANT domain, DNA binding IPR014778; Myb, DNA-binding IPR015495; Myb transcription factor IPR017930; Transcription regulator HTH, Myb-type, DNA-binding	GO:0003677; DNA binding; Molecular Function	hypothetical protein LOC100249492; K09422 myb proto-oncogene protein, plant	MYB39_ARATH Transcription factor MYB39 OS=Arabidopsis thaliana GN=MYB39 PE=2 SV=1	G7IRN8_MEDTR Myb-related transcription factor OS=Medicago truncatula GN=MTR_1g062050 PE=4 SV=1
Ca_14120	13544045-13545163	1	IPR002259; Delayed-early response protein/equilibrative nucleoside transporter	GO:0005337; nucleoside transmembrane transporter activity; Molecular Function GO:0006810; transport; Biological Process GO:0016020; membrane; Cellular Component	hypothetical protein; K03323 equilibrative nucleoside transporter, ENT family	S29A2_HUMAN Equilibrative nucleoside transporter 2 OS=Homo sapiens GN=SLC29A2 PE=1 SV=3	G7IRM9_MEDTR Equilibrative nucleoside transporter OS=Medicago truncatula GN=MTR_2g089520 PE=4 SV=1
Ca_14121	13549143-13552237	1	IPR001752; Kinesin, motor domain IPR019821; Kinesin, motor region, conserved site	GO:0003777; microtubule motor activity; Molecular Function GO:0005524; ATP binding; Molecular Function GO:0007018; microtubule-based movement; Biological Process	hypothetical protein LOC100259414; K10401 kinesin family member 18/19	KIF19_MOUSE Kinesin-like protein KIF19 OS=Mus musculus GN=Kif19 PE=1 SV=2	B9RE57_RICCO Chromosome-associated kinesin KIF4A, putative OS=Ricinus communis GN=RCOM_1618460 PE=3 SV=1
Ca_14122	13554372-13558644	1	IPR002259; Delayed-early response protein/equilibrative nucleoside transporter	GO:0005337; nucleoside transmembrane transporter activity; Molecular Function GO:0006810; transport; Biological Process GO:0016020; membrane; Cellular Component	hypothetical protein; K03323 equilibrative nucleoside transporter, ENT family	S29A4_DANRE Equilibrative nucleoside transporter 4 OS=Danio rerio GN=slc29a4 PE=2 SV=1	G7IRM9_MEDTR Equilibrative nucleoside transporter OS=Medicago truncatula GN=MTR_2g089520 PE=4 SV=1
Ca_14123	13565240-13567887	1	IPR005805; Rieske iron-sulphur protein, C-terminal IPR014349; Rieske iron-sulphur protein IPR014909; Cytochrome b6-f complex Fe-S subunit IPR017941; Rieske [2Fe-2S] iron-sulphur domain	GO:0008121; ubiquinol-cytochrome-c reductase activity; Molecular Function GO:0009496; plastoquinol-plastocyanin reductase activity; Molecular Function GO:0016020; membrane; Cellular Component GO:0016491; oxidoreductase activity; Molecular Function GO:0016679; oxidoreductase activity, acting on diphenols and related substances as donors; Molecular Function GO:0042651; thylakoid membrane; Cellular …	hypothetical protein LOC100258879; K02636 cytochrome b6-f complex iron-sulfur subunit [EC:1.10.99.1]	UCRIA_PEA Cytochrome b6-f complex iron-sulfur subunit, chloroplastic OS=Pisum sativum GN=petC PE=2 SV=1	Q9SXU4_CICAR Cytochrome b6-f complex iron-sulfur subunit (Fragment) OS=Cicer arietinum PE=2 SV=1
Ca_14124	13578855-13581189	1	IPR004367; Cyclin, C-terminal IPR006670; Cyclin IPR006671; Cyclin, N-terminal	GO:0005634; nucleus; Cellular Component	hypothetical protein LOC100264093; K14505 cyclin D3, plant	CCD61_ARATH Putative cyclin-D6-1 OS=Arabidopsis thaliana GN=CYCD6-1 PE=2 SV=1	G7IRM6_MEDTR Cyclin-D5-2 OS=Medicago truncatula GN=MTR_2g089490 PE=3 SV=1
Ca_14125	13590037-13592412	1	IPR000719; Protein kinase, catalytic domain IPR000858; S-locus glycoprotein IPR001480; Bulb-type lectin domain IPR002290; Serine/threonine-protein kinase domain IPR003609; Apple-like IPR008271; Serine/threonine-protein kinase, active site IPR013227; PAN-2 domain IPR017441; Protein kinase, ATP binding site IPR017442; Serine/threonine-protein kinase-like domain IPR020635; Tyrosine-protein kinase, c…	GO:0004672; protein kinase activity; Molecular Function GO:0004674; protein serine/threonine kinase activity; Molecular Function GO:0005524; ATP binding; Molecular Function GO:0005529; sugar binding; Molecular Function GO:0006468; protein phosphorylation; Biological Process GO:0048544; recognition of pollen; Biological Process	BAK1; BAK1 (BRI1-ASSOCIATED RECEPTOR KINASE); kinase/ protein binding / protein heterodimerization/ protein serine/threonine kinase; K13416 brassinosteroid insensitive 1-associated receptor kinase 1 [EC:2.7.10.1 2.7.11.1]	Y2913_ARATH G-type lectin S-receptor-like serine/threonine-protein kinase At2g19130 OS=Arabidopsis thaliana GN=At2g19130 PE=2 SV=1	G7IRM2_MEDTR Kinase-like protein OS=Medicago truncatula GN=MTR_2g089440 PE=4 SV=1
Ca_14126	13595545-13597905	1	IPR000719; Protein kinase, catalytic domain IPR000858; S-locus glycoprotein IPR001480; Bulb-type lectin domain IPR002290; Serine/threonine-protein kinase domain IPR003609; Apple-like IPR013227; PAN-2 domain IPR017441; Protein kinase, ATP binding site IPR017442; Serine/threonine-protein kinase-like domain IPR020635; Tyrosine-protein kinase, catalytic domain	GO:0004672; protein kinase activity; Molecular Function GO:0004674; protein serine/threonine kinase activity; Molecular Function GO:0005524; ATP binding; Molecular Function GO:0005529; sugar binding; Molecular Function GO:0006468; protein phosphorylation; Biological Process GO:0048544; recognition of pollen; Biological Process	BAK1; BAK1 (BRI1-ASSOCIATED RECEPTOR KINASE); kinase/ protein binding / protein heterodimerization/ protein serine/threonine kinase; K13416 brassinosteroid insensitive 1-associated receptor kinase 1 [EC:2.7.10.1 2.7.11.1]	Y2913_ARATH G-type lectin S-receptor-like serine/threonine-protein kinase At2g19130 OS=Arabidopsis thaliana GN=At2g19130 PE=2 SV=1	G7IRM2_MEDTR Kinase-like protein OS=Medicago truncatula GN=MTR_2g089440 PE=4 SV=1
Ca_14127	13605845-13608310	1	IPR000719; Protein kinase, catalytic domain IPR000858; S-locus glycoprotein IPR001480; Bulb-type lectin domain IPR002290; Serine/threonine-protein kinase domain IPR003609; Apple-like IPR008271; Serine/threonine-protein kinase, active site IPR013227; PAN-2 domain IPR017442; Serine/threonine-protein kinase-like domain IPR020635; Tyrosine-protein kinase, catalytic domain	GO:0004672; protein kinase activity; Molecular Function GO:0004674; protein serine/threonine kinase activity; Molecular Function GO:0005524; ATP binding; Molecular Function GO:0005529; sugar binding; Molecular Function GO:0006468; protein phosphorylation; Biological Process GO:0048544; recognition of pollen; Biological Process	BRASSINOSTEROID INSENSITIVE 1-associated receptor kinase 1 precursor, putative (EC:2.7.10.1 1.3.1.74); K13416 brassinosteroid insensitive 1-associated receptor kinase 1 [EC:2.7.10.1 2.7.11.1]	Y2913_ARATH G-type lectin S-receptor-like serine/threonine-protein kinase At2g19130 OS=Arabidopsis thaliana GN=At2g19130 PE=2 SV=1	G7IRL5_MEDTR Kinase-like protein OS=Medicago truncatula GN=MTR_2g089360 PE=3 SV=1
Ca_14128	13613359-13615791	1	IPR006015; Universal stress protein A IPR006016; UspA	GO:0006950; response to stress; Biological Process	hypothetical protein; K06674 structural maintenance of chromosome 2	YFK5_SCHPO Uncharacterized protein C167.05 OS=Schizosaccharomyces pombe (strain 972 / ATCC 24843) GN=SPAC167.05 PE=1 SV=2	G7IRL4_MEDTR Putative uncharacterized protein OS=Medicago truncatula GN=MTR_2g089350 PE=4 SV=1
Ca_14130	13666938-13667282	1	IPR002048; Calcium-binding EF-hand IPR018247; EF-Hand 1, calcium-binding site IPR018249; EF-HAND 2	GO:0005509; calcium ion binding; Molecular Function	hypothetical protein LOC100026359; K10840 centrin-2	PBP1_ARATH Calcium-binding protein PBP1 OS=Arabidopsis thaliana GN=PBP1 PE=1 SV=1	G7IRK4_MEDTR Centrin-2 OS=Medicago truncatula GN=MTR_2g089210 PE=4 SV=1
Ca_14131	13669610-13670668	1	IPR000782; FAS1 domain	-	-	FLA21_ARATH Fasciclin-like arabinogalactan protein 21 OS=Arabidopsis thaliana GN=FLA21 PE=2 SV=1	G7IRK3_MEDTR Fasciclin-like arabinogalactan protein OS=Medicago truncatula GN=MTR_2g089200 PE=4 SV=1
Ca_14132	13676635-13676955	1	-	-	-	-	G7IRK2_MEDTR Putative uncharacterized protein OS=Medicago truncatula GN=MTR_2g089190 PE=4 SV=1
Ca_14133	13679786-13680361	1	IPR001471; Pathogenesis-related transcriptional factor/ERF, DNA-binding	GO:0003700; sequence-specific DNA binding transcription factor activity; Molecular Function GO:0006355; regulation of transcription, DNA-dependent; Biological Process	DREB2A; DREB2A; DNA binding / transcription activator/ transcription factor; K09286 EREBP-like factor	DRE2C_ARATH Dehydration-responsive element-binding protein 2C OS=Arabidopsis thaliana GN=DREB2C PE=2 SV=2	G7IRK1_MEDTR Dehydration responsive factor OS=Medicago truncatula GN=MTR_2g089170 PE=4 SV=1
Ca_14134	13684753-13687054	1	IPR000757; Glycoside hydrolase, family 16 IPR008264; Beta-glucanase IPR010713; Xyloglucan endo-transglycosylase, C-terminal	GO:0004553; hydrolase activity, hydrolyzing O-glycosyl compounds; Molecular Function GO:0005618; cell wall; Cellular Component GO:0005975; carbohydrate metabolic process; Biological Process GO:0006073; cellular glucan metabolic process; Biological Process GO:0016762; xyloglucan:xyloglucosyl transferase activity; Molecular Function GO:0048046; apoplast; Cellular Component	hypothetical protein; K08235 xyloglucan:xyloglucosyl transferase [EC:2.4.1.207]	XTH9_ARATH Xyloglucan endotransglucosylase/hydrolase protein 9 OS=Arabidopsis thaliana GN=XTH9 PE=2 SV=2	G7IRJ7_MEDTR Xyloglucan endotransglucosylase/hydrolase OS=Medicago truncatula GN=MTR_2g089140 PE=4 SV=1
Ca_14135	13698896-13706348	1	IPR001906; Terpene synthase-like IPR005630; Terpene synthase, metal-binding domain	GO:0000287; magnesium ion binding; Molecular Function GO:0008152; metabolic process; Biological Process GO:0016829; lyase activity; Molecular Function	hypothetical protein; K12742 isoprene synthase [EC:4.2.3.27]	LLOS_OCIBA R-linalool synthase, chloroplastic OS=Ocimum basilicum GN=LIS PE=1 SV=1	G7IRJ6_MEDTR Myrcene synthase OS=Medicago truncatula GN=MTR_2g089130 PE=4 SV=1
Ca_10509	3502263-3504496	2	IPR003388; Reticulon	GO:0005783; endoplasmic reticulum; Cellular Component	-	RTNLP_ARATH Reticulon-like protein B16 OS=Arabidopsis thaliana GN=RTNLB16 PE=2 SV=1	G7KKV5_MEDTR Reticulon-like protein B16 OS=Medicago truncatula GN=MTR_6g012460 PE=4 SV=1
Ca_10508	3509229-3510575	2	IPR002963; Expansin IPR007112; Expansin/pollen allergen, DPBB domain IPR007117; Pollen allergen/expansin, C-terminal IPR007118; Expansin/Lol pI IPR009009; Barwin-related endoglucanase	GO:0005576; extracellular region; Cellular Component GO:0009664; plant-type cell wall organization; Biological Process	-	EXP15_ARATH Expansin-A15 OS=Arabidopsis thaliana GN=EXPA15 PE=2 SV=2	G7L212_MEDTR Alpha-expansin OS=Medicago truncatula GN=MTR_7g011060 PE=3 SV=1
Ca_10489	3734966-3736818	2	IPR018946; Alkaline phosphatase D-related	-	hypothetical protein; K01113 alkaline phosphatase D [EC:3.1.3.1]	PPA23_ARATH Purple acid phosphatase 23 OS=Arabidopsis thaliana GN=PAP23 PE=1 SV=2	G7KLC0_MEDTR Purple acid phosphatase OS=Medicago truncatula GN=MTR_6g013050 PE=4 SV=1
Ca_10487	3742547-3744746	2	IPR003245; Plastocyanin-like	GO:0005507; copper ion binding; Molecular Function GO:0009055; electron carrier activity; Molecular Function	-	LAML_ARATH Lamin-like protein OS=Arabidopsis thaliana GN=At5g15350 PE=1 SV=1	Q2HWC7_MEDTR Blue (Type 1) copper domain OS=Medicago truncatula GN=MtrDRAFT_AC147482g4v2 PE=4 SV=1
Ca_10488	3737810-3741056	2	IPR022017; Domain of unknown function DUF3598	-	-	-	Q2HWC9_MEDTR Putative uncharacterized protein OS=Medicago truncatula GN=MTR_6g013150 PE=4 SV=1
Ca_16015	17138165-17164751	2	IPR018129; Phosphoenolpyruvate carboxylase, active site IPR021135; Phosphoenolpyruvate carboxylase	GO:0006099; tricarboxylic acid cycle; Biological Process GO:0008964; phosphoenolpyruvate carboxylase activity; Molecular Function GO:0015977; carbon fixation; Biological Process	hypothetical protein LOC100247335; K01595 phosphoenolpyruvate carboxylase [EC:4.1.1.31]	CAPP4_ARATH Phosphoenolpyruvate carboxylase 4 OS=Arabidopsis thaliana GN=PPC4 PE=2 SV=1	Q6Q2Z9_SOYBN Phosphoenolpyruvate carboxylase OS=Glycine max GN=PEPC17 PE=2 SV=1
Ca_17808	32139718-32148028	2	IPR000209; Peptidase S8/S53, subtilisin/kexin/sedolisin IPR003137; Protease-associated domain, PA IPR010259; Proteinase inhibitor I9, subtilisin propeptide IPR015500; Peptidase S8, subtilisin-related IPR022398; Peptidase S8/S53, subtilisin, active site	GO:0004252; serine-type endopeptidase activity; Molecular Function GO:0006508; proteolysis; Biological Process GO:0042802; identical protein binding; Molecular Function GO:0043086; negative regulation of catalytic activity; Biological Process	GH14386 gene product from transcript GH14386-RA; K08653 membrane-bound transcription factor site-1 protease [EC:3.4.21.112]	SUBL_ARATH Subtilisin-like protease OS=Arabidopsis thaliana GN=ARA12 PE=1 SV=1	G7K7I8_MEDTR Subtilisin-like protease OS=Medicago truncatula GN=MTR_5g085690 PE=4 SV=1
Ca_17809	32135649-32138874	2	IPR002319; Phenylalanyl-tRNA synthetase IPR005121; Phenylalanyl-tRNA synthetase, beta subunit, ferrodoxin-fold anticodon-binding IPR006195; Aminoacyl-tRNA synthetase, class II	GO:0000049; tRNA binding; Molecular Function GO:0000166; nucleotide binding; Molecular Function GO:0000287; magnesium ion binding; Molecular Function GO:0004812; aminoacyl-tRNA ligase activity; Molecular Function GO:0004826; phenylalanine-tRNA ligase activity; Molecular Function GO:0005524; ATP binding; Molecular Function GO:0005737; cytoplasm; Cellular Component GO:0006412; translation; Biologic…	phenylalanine-tRNA ligase (EC:6.1.1.20); K01889 phenylalanyl-tRNA synthetase alpha chain [EC:6.1.1.20]	SYFM_ARATH Phenylalanine--tRNA ligase, chloroplastic/mitochondrial OS=Arabidopsis thaliana GN=At3g58140 PE=1 SV=1	G7KW40_MEDTR 50S ribosomal protein L20 OS=Medicago truncatula GN=MTR_7g083030 PE=3 SV=1
Ca_09764	35894648-35899486	2	IPR006823; Neutral/alkaline nonlysosomal ceramidase	-	ceramidase, putative; K12349 neutral ceramidase [EC:3.5.1.23]	NCASE_ORYSJ Neutral ceramidase OS=Oryza sativa subsp. japonica GN=Os01g0624000 PE=1 SV=1	G7K4V4_MEDTR Neutral ceramidase OS=Medicago truncatula GN=MTR_5g096890 PE=4 SV=1
Ca_09765	35900476-35907508	2	IPR000941; Enolase IPR020810; Enolase, C-terminal IPR020811; Enolase, N-terminal	GO:0000015; phosphopyruvate hydratase complex; Cellular Component GO:0000287; magnesium ion binding; Molecular Function GO:0004634; phosphopyruvate hydratase activity; Molecular Function GO:0006096; glycolysis; Biological Process	similar to enolase, putative; K01689 enolase [EC:4.2.1.11]	ENO3_ARATH Cytosolic enolase 3 OS=Arabidopsis thaliana GN=ENO3 PE=2 SV=1	G7K4W1_MEDTR Enolase OS=Medicago truncatula GN=MTR_5g096970 PE=3 SV=1
Ca_09772	35972760-35986890	2	IPR000767; Disease resistance protein IPR002182; NB-ARC	GO:0005524; ATP binding; Molecular Function GO:0006915; apoptosis; Biological Process GO:0006952; defense response; Biological Process	hypothetical protein LOC100254298; K13459 disease resistance protein RPS2	DRL27_ARATH Disease resistance protein At4g27190 OS=Arabidopsis thaliana GN=At4g27190 PE=2 SV=1	G7KHA8_MEDTR Cc-nbs-lrr resistance protein OS=Medicago truncatula GN=MTR_5g085400 PE=4 SV=1
Ca_09773	35988041-35994623	2	IPR000767; Disease resistance protein IPR002182; NB-ARC	GO:0005524; ATP binding; Molecular Function GO:0006915; apoptosis; Biological Process GO:0006952; defense response; Biological Process	RPS5; RPS5 (RESISTANT TO P. SYRINGAE 5); nucleotide binding; K13460 disease resistance protein RPS5	DRL27_ARATH Disease resistance protein At4g27190 OS=Arabidopsis thaliana GN=At4g27190 PE=2 SV=1	G7KHA8_MEDTR Cc-nbs-lrr resistance protein OS=Medicago truncatula GN=MTR_5g085400 PE=4 SV=1
Ca_09778	36029747-36033434	2	IPR006068; ATPase, P-type cation-transporter, C-terminal IPR008250; ATPase, P-type, ATPase-associated domain	GO:0005524; ATP binding; Molecular Function GO:0006754; ATP biosynthetic process; Biological Process GO:0006812; cation transport; Biological Process GO:0015662; ATPase activity, coupled to transmembrane movement of ions, phosphorylative mechanism; Molecular Function GO:0016020; membrane; Cellular Component GO:0016820; hydrolase activity, acting on acid anhydrides, catalyzing transmembrane moveme…	calcium-transporting ATPase, plasma membrane-type, putative / Ca(2+)-ATPase, putative (ACA12); K01537 Ca2+-transporting ATPase [EC:3.6.3.8]	ACA12_ARATH Calcium-transporting ATPase 12, plasma membrane-type OS=Arabidopsis thaliana GN=ACA12 PE=2 SV=1	G7KEN1_MEDTR Calcium-transporting ATPase OS=Medicago truncatula GN=MTR_5g097270 PE=4 SV=1
Ca_09779	36037037-36038157	2	IPR001344; Chlorophyll A-B binding protein, plant IPR022796; Chlorophyll A-B binding protein	GO:0009765; photosynthesis, light harvesting; Biological Process GO:0016020; membrane; Cellular Component	Lhcb2-1; light-harvesting complex II protein Lhcb2; K08913 light-harvesting complex II chlorophyll a/b binding protein 2	CB215_PEA Chlorophyll a-b binding protein 215, chloroplastic OS=Pisum sativum GN=CAB215 PE=1 SV=1	G7KEN2_MEDTR Chlorophyll a/b binding protein OS=Medicago truncatula GN=MTR_5g097280 PE=4 SV=1
Ca_09775	36007122-36008155	2	-	-	-	-	-
Ca_09776	36011176-36018594	2	IPR007187; Nucleoporin, Nup133/Nup155-like, C-terminal IPR014908; Nucleoporin, Nup133/Nup155-like, N-terminal	-	hypothetical protein LOC100249432; K14300 nuclear pore complex protein Nup133	-	G7KEN0_MEDTR Nucleoporin OS=Medicago truncatula GN=MTR_5g097260 PE=4 SV=1
Ca_09777	36021257-36025228	2	-	-	hypothetical protein; K03681 exosome complex component RRP40	EXOS3_DICDI Putative exosome complex component rrp40 OS=Dictyostelium discoideum GN=exosc3 PE=3 SV=1	B7FLI0_MEDTR Exosome complex exonuclease RRP40 OS=Medicago truncatula GN=MTR_5g043110 PE=2 SV=1
Ca_09780	36039276-36039497	2	-	-	-	PP285_ARATH Pentatricopeptide repeat-containing protein At3g57430, chloroplastic OS=Arabidopsis thaliana GN=PCMP-H81 PE=2 SV=2	D7TD47_VITVI Putative uncharacterized protein OS=Vitis vinifera GN=VIT_12s0057g00640 PE=4 SV=1
Ca_09781	36043355-36043705	2	-	-	-	-	G7KEN3_MEDTR Putative uncharacterized protein OS=Medicago truncatula GN=MTR_5g097300 PE=4 SV=1
Ca_09782	36054697-36056828	2	IPR001965; Zinc finger, PHD-type IPR004082; Protein of unknown function DUF1423, plant	GO:0005515; protein binding; Molecular Function GO:0008270; zinc ion binding; Molecular Function	-	PVIP_PEA OBERON-like protein (Fragment) OS=Pisum sativum GN=PVIP PE=1 SV=1	G7KEP0_MEDTR Potyvirus VPg interacting protein OS=Medicago truncatula GN=MTR_5g097360 PE=4 SV=1
Ca_09783	36057256-36057840	2	IPR000782; FAS1 domain	-	-	-	G7KEP1_MEDTR Putative uncharacterized protein OS=Medicago truncatula GN=MTR_5g097370 PE=4 SV=1
Ca_09784	36065884-36071922	2	IPR001789; Signal transduction response regulator, receiver domain IPR003594; ATPase-like, ATP-binding domain IPR003661; Signal transduction histidine kinase, subgroup 1, dimerisation/phosphoacceptor domain IPR004358; Signal transduction histidine kinase-related protein, C-terminal IPR005467; Signal transduction histidine kinase, core IPR006189; CHASE	GO:0000155; two-component sensor activity; Molecular Function GO:0000156; two-component response regulator activity; Molecular Function GO:0000160; two-component signal transduction system (phosphorelay); Biological Process GO:0004673; protein histidine kinase activity; Molecular Function GO:0005524; ATP binding; Molecular Function GO:0006355; regulation of transcription, DNA-dependent; Biologica…	histidine kinase cytokinin receptor; K14489 arabidopsis histidine kinase 2/3/4 (cytokinin receptor) [EC:2.7.13.3]	AHK2_ARATH Histidine kinase 2 OS=Arabidopsis thaliana GN=AHK2 PE=1 SV=1	G7KEP4_MEDTR Histidine kinase cytokinin receptor OS=Medicago truncatula GN=MTR_5g097410 PE=4 SV=1
Ca_19358	10859806-10861227	3	IPR015882; Acetylhexosaminidase, subunit a/b	GO:0004563; beta-N-acetylhexosaminidase activity; Molecular Function GO:0005975; carbohydrate metabolic process; Biological Process	HEXO1; HEXO1 (BETA-HEXOSAMINIDASE 1); beta-N-acetylhexosaminidase/ hexosaminidase/ hydrolase, hydrolyzing O-glycosyl compounds; K12373 hexosaminidase [EC:3.2.1.52]	HEXA2_DICDI Beta-hexosaminidase subunit A2 OS=Dictyostelium discoideum GN=hexa2 PE=3 SV=1	Q0WUA8_ARATH Beta-N-acetylhexosaminidase-like protein OS=Arabidopsis thaliana GN=At3g55260 PE=2 SV=1
Ca_24619	17199138-17201142	3	IPR008580; Domain of unknown function DUF862, eukaryotic	-	endo-beta-N-acetylglucosaminidase (EC:3.2.1.96); K01227 mannosyl-glycoprotein endo-beta-N-acetylglucosaminidase [EC:3.2.1.96]	PPDE2_XENLA PPPDE peptidase domain-containing protein 2 OS=Xenopus laevis GN=pppde2 PE=2 SV=1	G7L195_MEDTR PPPDE peptidase domain-containing protein OS=Medicago truncatula GN=MTR_7g058510 PE=4 SV=1
Ca_24618	17185687-17191898	3	IPR006968; Protein of unknown function DUF647	-	-	U420_DICDI UPF0420 protein OS=Dictyostelium discoideum GN=DDB_G0277179 PE=3 SV=1	G7L194_MEDTR Putative uncharacterized protein OS=Medicago truncatula GN=MTR_7g058500 PE=4 SV=1
Ca_09418	20132214-20132759	3	IPR019587; Polyketide cyclase/dehydrase	-	hypothetical protein; K14496 abscisic acid receptor PYR/PYL family	PYL4_ARATH Abscisic acid receptor PYL4 OS=Arabidopsis thaliana GN=PYL4 PE=1 SV=1	G7KT83_MEDTR Abscisic acid receptor PYL4 OS=Medicago truncatula GN=MTR_7g070050 PE=4 SV=1
Ca_09445	20548140-20549907	3	IPR000157; Toll-Interleukin receptor IPR000767; Disease resistance protein IPR002182; NB-ARC	GO:0004888; transmembrane receptor activity; Molecular Function GO:0005524; ATP binding; Molecular Function GO:0006915; apoptosis; Biological Process GO:0006952; defense response; Biological Process GO:0007165; signal transduction; Biological Process GO:0031224; intrinsic to membrane; Cellular Component GO:0045087; innate immune response; Biological Process	hypothetical protein; K13457 disease resistance protein RPM1	TMVRN_NICGU TMV resistance protein N OS=Nicotiana glutinosa GN=N PE=1 SV=1	G7JCP8_MEDTR Tir-nbs-lrr resistance protein OS=Medicago truncatula GN=MTR_4g080330 PE=4 SV=1
Ca_09446	20552049-20559362	3	-	-	similar to WAS protein family, member 3; K06083 WAS protein family, member 3	SCAR2_ARATH Protein SCAR2 OS=Arabidopsis thaliana GN=SCAR2 PE=1 SV=1	G7KV36_MEDTR Protein SCAR2 OS=Medicago truncatula GN=MTR_7g071440 PE=4 SV=1
Ca_08101	28092585-28097998	3	IPR000157; Toll-Interleukin receptor IPR000767; Disease resistance protein IPR002182; NB-ARC IPR003593; ATPase, AAA+ type, core	GO:0000166; nucleotide binding; Molecular Function GO:0004888; transmembrane receptor activity; Molecular Function GO:0005524; ATP binding; Molecular Function GO:0006915; apoptosis; Biological Process GO:0006952; defense response; Biological Process GO:0007165; signal transduction; Biological Process GO:0017111; nucleoside-triphosphatase activity; Molecular Function GO:0031224; intrinsic to membr…	hypothetical protein LOC100252764; K13457 disease resistance protein RPM1	TMVRN_NICGU TMV resistance protein N OS=Nicotiana glutinosa GN=N PE=1 SV=1	G7L5T5_MEDTR TMV resistance protein N OS=Medicago truncatula GN=MTR_7g088950 PE=4 SV=1
Ca_08102	28088801-28089935	3	-	-	-	-	G7L5T5_MEDTR TMV resistance protein N OS=Medicago truncatula GN=MTR_7g088950 PE=4 SV=1
Ca_07835	2147495-2148490	4	-	-	-	-	G7IED7_MEDTR Putative uncharacterized protein OS=Medicago truncatula GN=MTR_1g072310 PE=4 SV=1
Ca_07834	2141415-2143262	4	IPR002885; Pentatricopeptide repeat	-	-	PP302_ARATH Pentatricopeptide repeat-containing protein At4g02820, mitochondrial OS=Arabidopsis thaliana GN=At4g02820 PE=2 SV=1	G7IED6_MEDTR WD repeat-containing protein OS=Medicago truncatula GN=MTR_1g072300 PE=4 SV=1
Ca_07836	2149255-2153505	4	IPR001092; Helix-loop-helix DNA-binding domain	GO:0030528; transcription regulator activity; Molecular Function GO:0045449; regulation of transcription; Biological Process	Transcription factor AtMYC2, putative (EC:1.3.1.74); K13422 transcription factor MYC2	TT8_ARATH Transcription factor TT8 OS=Arabidopsis thaliana GN=TT8 PE=1 SV=2	E3SXU4_PEA BHLH OS=Pisum sativum GN=bHLH PE=4 SV=1
Ca_03783	4728496-4734867	4	IPR002110; Ankyrin repeat IPR020683; Ankyrin repeat-containing domain IPR021832; Protein of unknown function DUF3424	GO:0005515; protein binding; Molecular Function	-	AN13B_HUMAN Ankyrin repeat domain-containing protein 13B OS=Homo sapiens GN=ANKRD13B PE=2 SV=4	G7I6T1_MEDTR Ankyrin repeat domain-containing protein 13C-B OS=Medicago truncatula GN=MTR_1g080310 PE=4 SV=1
Ca_03784	4722098-4725306	4	IPR007811; RNA polymerase III Rpc4	GO:0003677; DNA binding; Molecular Function GO:0003899; DNA-directed RNA polymerase activity; Molecular Function GO:0005666; DNA-directed RNA polymerase III complex; Cellular Component GO:0006383; transcription from RNA polymerase III promoter; Biological Process	Os04g0394500; K03026 DNA-directed RNA polymerase III subunit RPC4	RPC4_MOUSE DNA-directed RNA polymerase III subunit RPC4 OS=Mus musculus GN=Polr3d PE=2 SV=2	G7I6T0_MEDTR DNA-directed RNA polymerase III subunit RPC4 OS=Medicago truncatula GN=MTR_1g080300 PE=4 SV=1
Ca_03781	4745538-4758091	4	IPR001214; SET domain IPR007728; Pre-SET domain IPR014778; Myb, DNA-binding IPR017930; Transcription regulator HTH, Myb-type, DNA-binding	GO:0005515; protein binding; Molecular Function GO:0005634; nucleus; Cellular Component GO:0008270; zinc ion binding; Molecular Function GO:0016568; chromatin modification; Biological Process GO:0018024; histone-lysine N-methyltransferase activity; Molecular Function	Ehmt1, G9a, NV11612; euchromatic histone-lysine N-methyltransferase 1; K11420 euchromatic histone-lysine N-methyltransferase [EC:2.1.1.43]	SUVR4_ARATH Histone-lysine N-methyltransferase SUVR4 OS=Arabidopsis thaliana GN=SUVR4 PE=2 SV=2	G7I6T4_MEDTR Histone-lysine N-methyltransferase SUVR4 OS=Medicago truncatula GN=MTR_1g080340 PE=3 SV=1
Ca_03778	4786303-4807465	4	IPR000330; SNF2-related IPR001650; Helicase, C-terminal IPR014001; DEAD-like helicase	GO:0003676; nucleic acid binding; Molecular Function GO:0003677; DNA binding; Molecular Function GO:0004386; helicase activity; Molecular Function GO:0005524; ATP binding; Molecular Function	atrx, MGC66223, atrxl, wu:fb26e12, wu:fb52h08, wu:fb94e07, zgc:66223; alpha thalassemia/mental retardation syndrome X-linked homolog (human); K10779 transcriptional regulator ATRX [EC:3.6.4.12]	ARIP4_XENTR Helicase ARIP4 OS=Xenopus tropicalis GN=rad54l2 PE=2 SV=1	E0CU60_VITVI Putative uncharacterized protein OS=Vitis vinifera GN=VIT_14s0036g01460 PE=4 SV=1
Ca_03601	6390289-6394129	4	-	-	-	-	B9N420_POPTR Predicted protein OS=Populus trichocarpa GN=POPTRDRAFT_581608 PE=4 SV=1
Ca_03600	6398757-6400910	4	IPR002885; Pentatricopeptide repeat	-	nucleobase:cation symporter; K03457 nucleobase:cation symporter-1, NCS1 family	PP281_ARATH Pentatricopeptide repeat-containing protein At3g53700, chloroplastic OS=Arabidopsis thaliana GN=MEE40 PE=2 SV=1	B9N416_POPTR Predicted protein OS=Populus trichocarpa GN=POPTRDRAFT_784595 PE=4 SV=1
Ca_03423	8095942-8096277	4	-	-	-	-	B9I9Y5_POPTR Predicted protein OS=Populus trichocarpa GN=POPTRDRAFT_572767 PE=4 SV=1
Ca_03422	8099551-8102401	4	IPR000095; PAK-box/P21-Rho-binding IPR000198; Rho GTPase-activating protein domain	GO:0005515; protein binding; Molecular Function GO:0005622; intracellular; Cellular Component GO:0007165; signal transduction; Biological Process	rga2; Rho-type GTPase activating protein Rga2; K08773 RalA-binding protein 1	GACA_DICDI Rho GTPase-activating protein gacA OS=Dictyostelium discoideum GN=gacA PE=3 SV=1	G7I2V1_MEDTR Rac GTPase activating protein OS=Medicago truncatula GN=MTR_1g089500 PE=4 SV=1
Ca_08305	8164137-8165857	4	IPR002168; Lipase, GDXG, active site IPR013094; Alpha/beta hydrolase fold-3	GO:0008152; metabolic process; Biological Process GO:0016787; hydrolase activity; Molecular Function	hypothetical protein; K14493 gibberellin receptor GID1 [EC:3.-.-.-]	GID1B_ARATH Gibberellin receptor GID1B OS=Arabidopsis thaliana GN=GID1B PE=1 SV=1	E3VJP7_9FABA Gibberellin receptor OS=Galega orientalis GN=GID PE=2 SV=1
Ca_14215	30947156-30949552	4	IPR000008; C2 calcium-dependent membrane targeting IPR013583; Phosphoribosyltransferase C-terminal IPR018029; C2 membrane targeting protein	GO:0005515; protein binding; Molecular Function	MG07037.4; hypothetical protein; K01613 phosphatidylserine decarboxylase [EC:4.1.1.65]	ESYT1_RAT Extended synaptotagmin-1 OS=Rattus norvegicus GN=Esyt1 PE=2 SV=1	G7ZV87_MEDTR Multiple C2 and transmembrane domain-containing protein OS=Medicago truncatula GN=MTR_021s0014 PE=4 SV=1
Ca_20364	34022577-34024786	4	IPR004252; Transposase, Ptta/En/Spm, plant	-	-	Y4443_ARATH Probable transposase-like protein At4g04430 OS=Arabidopsis thaliana GN=At4g04430 PE=1 SV=1	G7KMT6_MEDTR Uridine kinase OS=Medicago truncatula GN=MTR_6g021560 PE=3 SV=1
Ca_13098	38719930-38726818	4	IPR004263; Exostosin-like	GO:0016020; membrane; Cellular Component	GF13249 gene product from transcript GF13249-RA; K02366 glucuronyl/N-acetylglucosaminyl transferase EXT1 [EC:2.4.1.224 2.4.1.225]	GT101_ORYSJ Probable glucuronosyltransferase GUT1 OS=Oryza sativa subsp. japonica GN=GUT1 PE=2 SV=2	B9GTN0_POPTR Predicted protein OS=Populus trichocarpa GN=POPTRDRAFT_551361 PE=4 SV=1
Ca_09149	44847754-44853436	4	IPR003466; Chalcone isomerase, subgroup	GO:0016872; intramolecular lyase activity; Molecular Function GO:0042398; cellular modified amino acid biosynthetic process; Biological Process	-	-	G7I9U4_MEDTR Putative uncharacterized protein OS=Medicago truncatula GN=MTR_1g015700 PE=4 SV=1
Ca_09150	44858051-44861918	4	IPR001019; Guanine nucleotide binding protein (G-protein), alpha subunit IPR002976; Plant G-protein, alpha subunit	GO:0004871; signal transducer activity; Molecular Function GO:0005525; GTP binding; Molecular Function GO:0006471; protein ADP-ribosylation; Biological Process GO:0007186; G-protein coupled receptor protein signaling pathway; Biological Process GO:0019001; guanyl nucleotide binding; Molecular Function	GTP-binding protein (p) alpha subunit, gpa1, putative; K04640 guanine nucleotide binding protein (G protein), alpha, other	GPA1_PEA Guanine nucleotide-binding protein alpha-1 subunit OS=Pisum sativum GN=GPA1 PE=2 SV=1	G7I9U9_MEDTR G protein alpha subunit OS=Medicago truncatula GN=MTR_1g015750 PE=4 SV=1
Ca_03793	4629766-4631949	4	IPR007374; ASCH domain	-	-	TRIP4_MOUSE Activating signal cointegrator 1 OS=Mus musculus GN=Trip4 PE=1 SV=2	G7I689_MEDTR Activating signal cointegrator OS=Medicago truncatula GN=MTR_1g079930 PE=4 SV=1
Ca_03792	4633864-4634754	4	-	-	hypothetical protein; K06269 protein phosphatase 1, catalytic subunit [EC:3.1.3.16]	PP1_ORYSJ Serine/threonine-protein phosphatase PP1 OS=Oryza sativa subsp. japonica GN=Os03g0268000 PE=2 SV=2	Q0EAF2_VICFA Serine/threonine-protein phosphatase OS=Vicia faba GN=VfPP1c-4 PE=2 SV=1
Ca_03791	4638795-4640049	4	IPR004843; Metallo-dependent phosphatase IPR006186; Serine/threonine-specific protein phosphatase/bis(5-nucleosyl)-tetraphosphatase	GO:0016787; hydrolase activity; Molecular Function	serine/threonine protein phosphatase, putative (EC:3.1.3.16); K06269 protein phosphatase 1, catalytic subunit [EC:3.1.3.16]	PP1_ORYSJ Serine/threonine-protein phosphatase PP1 OS=Oryza sativa subsp. japonica GN=Os03g0268000 PE=2 SV=2	G7I691_MEDTR Serine/threonine-protein phosphatase OS=Medicago truncatula GN=MTR_1g079950 PE=3 SV=1
Ca_03790	4660757-4661669	4	IPR000719; Protein kinase, catalytic domain IPR002290; Serine/threonine-protein kinase domain IPR008271; Serine/threonine-protein kinase, active site IPR017441; Protein kinase, ATP binding site IPR017442; Serine/threonine-protein kinase-like domain IPR020635; Tyrosine-protein kinase, catalytic domain	GO:0004672; protein kinase activity; Molecular Function GO:0004674; protein serine/threonine kinase activity; Molecular Function GO:0005524; ATP binding; Molecular Function GO:0006468; protein phosphorylation; Biological Process	calcium-dependent protein kinase, putative (EC:2.7.11.17); K13412 calcium-dependent protein kinase [EC:2.7.11.1]	PPCK1_ARATH Phosphoenolpyruvate carboxylase kinase 1 OS=Arabidopsis thaliana GN=PPCK1 PE=1 SV=1	G7I696_MEDTR Calcium-dependent protein kinase OS=Medicago truncatula GN=MTR_1g080020 PE=4 SV=1
Ca_03789	4667579-4675050	4	IPR018247; EF-Hand 1, calcium-binding site IPR018249; EF-HAND 2	-	hypothetical protein LOC100250118; K11583 protein phosphatase 2 (formerly 2A), regulatory subunit B''	P2R3A_HUMAN Serine/threonine-protein phosphatase 2A regulatory subunit B'' subunit alpha OS=Homo sapiens GN=PPP2R3A PE=1 SV=1	G7I697_MEDTR Protein phosphatase 2A regulatory subunit B'-like protein OS=Medicago truncatula GN=MTR_1g080030 PE=4 SV=1
Ca_03788	4679143-4680330	4	IPR002885; Pentatricopeptide repeat	-	nucleobase:cation symporter; K03457 nucleobase:cation symporter-1, NCS1 family	PPR22_ARATH Pentatricopeptide repeat-containing protein At1g08610 OS=Arabidopsis thaliana GN=At1g08610 PE=2 SV=1	G7I6A5_MEDTR Pentatricopeptide repeat-containing protein OS=Medicago truncatula GN=MTR_1g080120 PE=4 SV=1
Ca_03787	4685219-4689534	4	IPR000504; RNA recognition motif domain	GO:0003676; nucleic acid binding; Molecular Function	nucleolysin TIAR (EC:1.4.3.6); K13126 polyadenylate-binding protein	RBM42_MOUSE RNA-binding protein 42 OS=Mus musculus GN=Rbm42 PE=1 SV=1	G7I6S0_MEDTR RNA-binding protein OS=Medicago truncatula GN=MTR_1g080150 PE=4 SV=1
Ca_03786	4699208-4699741	4	IPR006936; Domain of unknown function DUF640	-	-	-	F6H618_VITVI Putative uncharacterized protein OS=Vitis vinifera GN=VIT_14s0036g00540 PE=4 SV=1
Ca_03785	4706348-4709359	4	IPR001597; Aromatic amino acid beta-eliminating lyase/threonine aldolase	GO:0006520; cellular amino acid metabolic process; Biological Process GO:0016829; lyase activity; Molecular Function	l-allo-threonine aldolase, putative (EC:4.1.2.5); K01620 threonine aldolase [EC:4.1.2.5]	LTAA_AERJA L-allo-threonine aldolase OS=Aeromonas jandaei GN=ltaA PE=1 SV=1	G7I6S7_MEDTR L-allo-threonine aldolase OS=Medicago truncatula GN=MTR_1g080250 PE=4 SV=1
Ca_03782	4736508-4739412	4	-	-	hypothetical protein; K00717 glycoprotein 6-alpha-L-fucosyltransferase [EC:2.4.1.68]	-	G7I6T2_MEDTR Putative uncharacterized protein OS=Medicago truncatula GN=MTR_1g080320 PE=4 SV=1
Ca_03780	4773768-4774859	4	IPR000008; C2 calcium-dependent membrane targeting IPR018029; C2 membrane targeting protein	GO:0005515; protein binding; Molecular Function	-	-	G7I6T6_MEDTR Putative uncharacterized protein OS=Medicago truncatula GN=MTR_1g080360 PE=4 SV=1
Ca_03779	4780501-4782717	4	IPR009291; Vacuolar protein sorting-associated protein 62	-	-	-	G7I6T7_MEDTR Putative uncharacterized protein OS=Medicago truncatula GN=MTR_1g080370 PE=4 SV=1
Ca_03777	4811009-4824645	4	IPR000642; Peptidase M41 IPR001315; Caspase Recruitment IPR003593; ATPase, AAA+ type, core IPR003959; ATPase, AAA-type, core	GO:0000166; nucleotide binding; Molecular Function GO:0004222; metalloendopeptidase activity; Molecular Function GO:0005515; protein binding; Molecular Function GO:0005524; ATP binding; Molecular Function GO:0005622; intracellular; Cellular Component GO:0006508; proteolysis; Biological Process GO:0017111; nucleoside-triphosphatase activity; Molecular Function GO:0042981; regulation of apoptosis; …	cell division protein FtsH; K03798 cell division protease FtsH [EC:3.4.24.-]	FTSH_CYAME ATP-dependent zinc metalloprotease FtsH OS=Cyanidioschyzon merolae GN=ftsH PE=3 SV=1	G7I6U3_MEDTR Cell division protease ftsH-like protein OS=Medicago truncatula GN=MTR_1g080430 PE=4 SV=1
Ca_03776	4826086-4829241	4	IPR000719; Protein kinase, catalytic domain IPR001611; Leucine-rich repeat IPR002290; Serine/threonine-protein kinase domain IPR003591; Leucine-rich repeat, typical subtype IPR008271; Serine/threonine-protein kinase, active site IPR013210; Leucine-rich repeat-containing N-terminal, type 2 IPR017441; Protein kinase, ATP binding site IPR017442; Serine/threonine-protein kinase-like domain IPR020635;…	GO:0004672; protein kinase activity; Molecular Function GO:0004674; protein serine/threonine kinase activity; Molecular Function GO:0005515; protein binding; Molecular Function GO:0005524; ATP binding; Molecular Function GO:0006468; protein phosphorylation; Biological Process	CLV1; CLV1 (CLAVATA 1); ATP binding / kinase/ protein serine/threonine kinase/ receptor signaling protein serine/threonine kinase; K00924 [EC:2.7.1.-]	PXL1_ARATH Leucine-rich repeat receptor-like protein kinase PXL1 OS=Arabidopsis thaliana GN=PXL1 PE=2 SV=1	G7I6U4_MEDTR Receptor-like protein kinase OS=Medicago truncatula GN=MTR_1g080440 PE=4 SV=1
Ca_03775	4837112-4839141	4	IPR004252; Transposase, Ptta/En/Spm, plant	-	-	-	G7IKJ3_MEDTR TdcA1-ORF2 protein OS=Medicago truncatula GN=MTR_2g088630 PE=4 SV=1
Ca_03774	4842461-4845772	4	IPR002495; Glycosyl transferase, family 8	GO:0016757; transferase activity, transferring glycosyl groups; Molecular Function	glycogenin, putative (EC:2.4.1.186); K00750 glycogenin glucosyltransferase [EC:2.4.1.186]	GLYG_MOUSE Glycogenin-1 OS=Mus musculus GN=Gyg1 PE=2 SV=3	G7I6U5_MEDTR Glycogenin-1 OS=Medicago truncatula GN=MTR_1g080460 PE=4 SV=1
Ca_03773	4855591-4859486	4	IPR004305; TENA/THI-4 protein/Coenzyme PQQ biosynthesis protein C domain	-	hypothetical protein; K03707 thiaminase (transcriptional activator TenA) [EC:3.5.99.2]	Y358_HAEIN Uncharacterized protein HI_0358 OS=Haemophilus influenzae (strain ATCC 51907 / DSM 11121 / KW20 / Rd) GN=HI_0358 PE=3 SV=1	F6HYH8_VITVI Putative uncharacterized protein OS=Vitis vinifera GN=VIT_04s0159g00050 PE=4 SV=1
Ca_03772	4860719-4861860	4	-	-	-	-	-
Ca_03771	4873702-4874543	4	-	-	-	-	Q67VX5_ORYSJ Os06g0488200 protein OS=Oryza sativa subsp. japonica GN=P0583E12.11 PE=4 SV=1
Ca_03770	4877996-4881265	4	IPR001584; Integrase, catalytic core	GO:0003677; DNA binding; Molecular Function GO:0015074; DNA integration; Biological Process	Os11g0157000; K12619 5'-3' exoribonuclease 2 [EC:3.1.13.-]	POLX_TOBAC Retrovirus-related Pol polyprotein from transposon TNT 1-94 OS=Nicotiana tabacum PE=2 SV=1	A5AYC4_VITVI Putative uncharacterized protein OS=Vitis vinifera GN=VITISV_029672 PE=4 SV=1
Ca_03769	4881612-4892661	4	IPR000048; IQ motif, EF-hand binding site IPR001609; Myosin head, motor domain IPR004009; Myosin, N-terminal, SH3-like	GO:0003774; motor activity; Molecular Function GO:0005515; protein binding; Molecular Function GO:0005524; ATP binding; Molecular Function GO:0016459; myosin complex; Cellular Component	Myo5; myosin 5; K10357 myosin V	MYSN_ACACA Myosin-2 heavy chain, non muscle OS=Acanthamoeba castellanii PE=3 SV=1	B9FTD5_ORYSJ Putative uncharacterized protein OS=Oryza sativa subsp. japonica GN=OsJ_21402 PE=3 SV=1
Ca_03768	4895783-4897854	4	IPR007726; SSXT	-	-	SSXT_HUMAN Protein SSXT OS=Homo sapiens GN=SS18 PE=1 SV=3	F6HVK9_VITVI Putative uncharacterized protein OS=Vitis vinifera GN=VIT_14s0081g00200 PE=4 SV=1
Ca_03767	4908910-4915535	4	IPR000031; Phosphoribosylaminoimidazole carboxylase, core IPR003135; ATP-grasp fold, ATP-dependent carboxylate-amine ligase-type IPR011761; ATP-grasp fold	GO:0003824; catalytic activity; Molecular Function GO:0004638; phosphoribosylaminoimidazole carboxylase activity; Molecular Function GO:0005524; ATP binding; Molecular Function GO:0006189; 'de novo' IMP biosynthetic process; Biological Process	phosphoribosylaminoimidazole carboxylase atpase-subunit, putative (EC:4.1.1.21); K11808 phosphoribosylaminoimidazole carboxylase [EC:4.1.1.21]	PUR6_VIGAC Phosphoribosylaminoimidazole carboxylase, chloroplastic (Fragment) OS=Vigna aconitifolia GN=PURKE PE=2 SV=1	G7I6U8_MEDTR Phosphoribosylaminoimidazole carboxylase OS=Medicago truncatula GN=MTR_1g080500 PE=4 SV=1
Ca_03766	4920391-4921401	4	IPR006564; Zinc finger, PMZ-type IPR007527; Zinc finger, SWIM-type IPR018289; MULE transposase, conserved domain	GO:0008270; zinc ion binding; Molecular Function	hypothetical protein LOC100244778; K10583 ubiquitin-conjugating enzyme E2 S [EC:6.3.2.19]	-	A5C4J5_VITVI Putative uncharacterized protein OS=Vitis vinifera GN=VIT_14s0081g00330 PE=4 SV=1
Ca_03765	4930384-4931634	4	IPR002775; DNA/RNA-binding protein Alba-like	GO:0003676; nucleic acid binding; Molecular Function	-	Y2416_ARATH Uncharacterized protein At2g34160 OS=Arabidopsis thaliana GN=At2g34160 PE=1 SV=1	B9S7H5_RICCO Putative uncharacterized protein OS=Ricinus communis GN=RCOM_0607550 PE=4 SV=1
Ca_03764	4949341-4951439	4	IPR009675; Xklp2 targeting protein	-	-	-	C6T9C8_SOYBN Putative uncharacterized protein OS=Glycine max PE=2 SV=1
Ca_03763	4953366-4954060	4	IPR005818; Histone H1/H5 IPR005819; Histone H5	GO:0000786; nucleosome; Cellular Component GO:0003677; DNA binding; Molecular Function GO:0005634; nucleus; Cellular Component GO:0006334; nucleosome assembly; Biological Process	histone H1.2; K11275 histone H1/5	H12_ARATH Histone H1.2 OS=Arabidopsis thaliana GN=At2g30620 PE=1 SV=1	O65758_CICAR Histone H1 OS=Cicer arietinum PE=2 SV=1
Ca_03762	4958320-4960677	4	IPR000719; Protein kinase, catalytic domain IPR001245; Serine-threonine/tyrosine-protein kinase IPR002290; Serine/threonine-protein kinase domain IPR008271; Serine/threonine-protein kinase, active site IPR017441; Protein kinase, ATP binding site IPR020635; Tyrosine-protein kinase, catalytic domain IPR021720; Malectin	GO:0004672; protein kinase activity; Molecular Function GO:0004674; protein serine/threonine kinase activity; Molecular Function GO:0005524; ATP binding; Molecular Function GO:0006468; protein phosphorylation; Biological Process	protein kinase family protein; K04733 interleukin-1 receptor-associated kinase 4 [EC:2.7.11.1]	ANX2_ARATH Receptor-like protein kinase ANXUR2 OS=Arabidopsis thaliana GN=ANX2 PE=2 SV=1	F6HZA8_VITVI Putative uncharacterized protein OS=Vitis vinifera GN=VIT_07s0005g01640 PE=3 SV=1
Ca_03761	4967399-4968034	4	IPR012881; Protein of unknown function DUF1685	-	-	-	C6SW21_SOYBN Putative uncharacterized protein OS=Glycine max PE=2 SV=1
Ca_03760	4970627-4971202	4	IPR004895; Prenylated rab acceptor PRA1	-	-	PRA1E_ARATH PRA1 family protein E OS=Arabidopsis thaliana GN=PRA1E PE=1 SV=1	A5AWF7_VITVI Putative uncharacterized protein OS=Vitis vinifera GN=VITISV_021777 PE=4 SV=1
Ca_03759	4973822-4975439	4	IPR002777; Prefoldin beta-like	GO:0006457; protein folding; Biological Process GO:0016272; prefoldin complex; Cellular Component GO:0051082; unfolded protein binding; Molecular Function	hypothetical protein; K09550 prefoldin subunit 4	PFD4_ARATH Probable prefoldin subunit 4 OS=Arabidopsis thaliana GN=AIP3 PE=1 SV=3	C6SXR5_SOYBN Putative uncharacterized protein OS=Glycine max PE=2 SV=1
Ca_03758	4977558-4978450	4	IPR001153; Barwin IPR018226; Barwin, conserved site	GO:0042742; defense response to bacterium; Biological Process GO:0050832; defense response to fungus; Biological Process	-	WIN1_SOLTU Wound-induced protein WIN1 OS=Solanum tuberosum GN=WIN1 PE=2 SV=1	C6T2R0_SOYBN Putative uncharacterized protein OS=Glycine max PE=2 SV=1
Ca_03757	4982513-4983028	4	IPR001153; Barwin IPR018226; Barwin, conserved site	GO:0042742; defense response to bacterium; Biological Process GO:0050832; defense response to fungus; Biological Process	-	PR4B_TOBAC Pathogenesis-related protein PR-4B OS=Nicotiana tabacum PE=2 SV=1	Q9M7D9_PEA Pathogenesis-related protein 4A OS=Pisum sativum GN=PRP4A PE=2 SV=1
Ca_03756	4988843-4991407	4	IPR003311; AUX/IAA protein IPR011525; Aux/IAA-ARF-dimerisation	GO:0005634; nucleus; Cellular Component GO:0045449; regulation of transcription; Biological Process GO:0046983; protein dimerization activity; Molecular Function	IAA7; IAA7 (INDOLE-3-ACETIC ACID 7); transcription factor; K14484 auxin-responsive protein IAA	IAA16_ARATH Auxin-responsive protein IAA16 OS=Arabidopsis thaliana GN=IAA16 PE=1 SV=1	B9I5F9_POPTR Predicted protein OS=Populus trichocarpa GN=POPTRDRAFT_814326 PE=4 SV=1
Ca_03755	5003947-5009282	4	IPR001092; Helix-loop-helix DNA-binding domain	GO:0030528; transcription regulator activity; Molecular Function GO:0045449; regulation of transcription; Biological Process	PIF3; PIF3 (PHYTOCHROME INTERACTING FACTOR 3); DNA binding / protein binding / transcription factor/ transcription regulator; K12126 phytochrome-interacting factor 3	UNE12_ARATH Transcription factor UNE12 OS=Arabidopsis thaliana GN=UNE12 PE=2 SV=2	C0JP10_LOTJA Putative basic helix-loop-helix protein BHLH2 OS=Lotus japonicus PE=4 SV=1
Ca_03754	5016151-5017266	4	IPR003369; Bacterial sec-independent translocation protein MttA/Hcf106 IPR003998; Twin-arginine translocation protein TatB-like	GO:0008565; protein transporter activity; Molecular Function GO:0009306; protein secretion; Biological Process GO:0015031; protein transport; Biological Process GO:0016020; membrane; Cellular Component	hypothetical protein; K03116 sec-independent protein translocase protein TatA	TATA_SYNP6 Sec-independent protein translocase protein TatA OS=Synechococcus sp. (strain ATCC 27144 / PCC 6301 / SAUG 1402/1) GN=tatA PE=3 SV=1	B7FMF0_MEDTR Putative uncharacterized protein OS=Medicago truncatula PE=2 SV=1
Ca_03753	5018360-5022286	4	IPR004827; Basic-leucine zipper (bZIP) transcription factor IPR011616; bZIP transcription factor, bZIP-1 IPR020983; Basic leucine-zipper, C-terminal	GO:0003700; sequence-specific DNA binding transcription factor activity; Molecular Function GO:0006355; regulation of transcription, DNA-dependent; Biological Process GO:0043565; sequence-specific DNA binding; Molecular Function GO:0046983; protein dimerization activity; Molecular Function	hypothetical protein LOC100254083; K04371 extracellular signal-regulated kinase 1/2 [EC:2.7.11.24]	CPRF2_PETCR Light-inducible protein CPRF2 OS=Petroselinum crispum GN=CPRF2 PE=2 SV=2	B2DBE7_SOYBN BZIP protein OS=Glycine max GN=SBZ1 PE=2 SV=1
Ca_03752	5031956-5034388	4	IPR001509; NAD-dependent epimerase/dehydratase	GO:0003824; catalytic activity; Molecular Function GO:0044237; cellular metabolic process; Biological Process GO:0050662; coenzyme binding; Molecular Function	GDP-mannose-3',5'-epimerase; K10046 GDP-D-mannose 3', 5'-epimerase [EC:5.1.3.18 5.1.3.-]	GME_ARATH GDP-mannose 3,5-epimerase OS=Arabidopsis thaliana GN=At5g28840 PE=1 SV=1	B7FIJ7_MEDTR Putative uncharacterized protein OS=Medicago truncatula PE=2 SV=1
Ca_03751	5043718-5046354	4	IPR005746; Thioredoxin IPR010400; Proteasome-interacting thioredoxin-like domain, C-terminal	GO:0006662; glycerol ether metabolic process; Biological Process GO:0009055; electron carrier activity; Molecular Function GO:0015035; protein disulfide oxidoreductase activity; Molecular Function GO:0045454; cell redox homeostasis; Biological Process	similar to CG5495-PA; K03671 thioredoxin 1	PITH1_ARATH PITH domain-containing protein At3g04780 OS=Arabidopsis thaliana GN=At3g04780 PE=1 SV=2	C6SWW7_SOYBN Putative uncharacterized protein OS=Glycine max PE=2 SV=1
Ca_03750	5050176-5051697	4	-	-	-	-	C6T2H8_SOYBN Putative uncharacterized protein OS=Glycine max PE=2 SV=1
Ca_03749	5056001-5061004	4	IPR000719; Protein kinase, catalytic domain IPR002290; Serine/threonine-protein kinase domain IPR008271; Serine/threonine-protein kinase, active site IPR017441; Protein kinase, ATP binding site IPR017442; Serine/threonine-protein kinase-like domain IPR020635; Tyrosine-protein kinase, catalytic domain	GO:0004672; protein kinase activity; Molecular Function GO:0004674; protein serine/threonine kinase activity; Molecular Function GO:0005524; ATP binding; Molecular Function GO:0006468; protein phosphorylation; Biological Process	hypothetical protein; K08857 NIMA (never in mitosis gene a)-related kinase [EC:2.7.11.1]	NEK2_ORYSI Serine/threonine-protein kinase Nek2 OS=Oryza sativa subsp. indica GN=NEK2 PE=2 SV=1	B9MZF3_POPTR Predicted protein OS=Populus trichocarpa GN=POPTRDRAFT_595442 PE=4 SV=1
Ca_14213	30917947-30921018	4	IPR001584; Integrase, catalytic core IPR005162; Retrotransposon gag protein IPR013103; Reverse transcriptase, RNA-dependent DNA polymerase	GO:0003677; DNA binding; Molecular Function GO:0015074; DNA integration; Biological Process	Os11g0157000; K12619 5'-3' exoribonuclease 2 [EC:3.1.13.-]	POLX_TOBAC Retrovirus-related Pol polyprotein from transposon TNT 1-94 OS=Nicotiana tabacum PE=2 SV=1	A5CA30_VITVI Putative uncharacterized protein OS=Vitis vinifera GN=VITISV_025054 PE=4 SV=1
Ca_14214	30937023-30938348	4	IPR001584; Integrase, catalytic core	GO:0003677; DNA binding; Molecular Function GO:0015074; DNA integration; Biological Process	Os11g0157000; K12619 5'-3' exoribonuclease 2 [EC:3.1.13.-]	POLX_TOBAC Retrovirus-related Pol polyprotein from transposon TNT 1-94 OS=Nicotiana tabacum PE=2 SV=1	Q9C536_ARATH Copia-type polyprotein, putative OS=Arabidopsis thaliana GN=T18I24.5 PE=4 SV=1
Ca_14216	30995963-30997578	4	IPR004252; Transposase, Ptta/En/Spm, plant	-	-	-	G7IKJ3_MEDTR TdcA1-ORF2 protein OS=Medicago truncatula GN=MTR_2g088630 PE=4 SV=1
Ca_14217	31029436-31029648	4	IPR001128; Cytochrome P450 IPR017972; Cytochrome P450, conserved site	GO:0004497; monooxygenase activity; Molecular Function GO:0005506; iron ion binding; Molecular Function GO:0009055; electron carrier activity; Molecular Function GO:0020037; heme binding; Molecular Function	CYP705A2; electron carrier/ heme binding / iron ion binding / monooxygenase/ oxygen binding; K00517 [EC:1.14.-.-]	C93A3_SOYBN Cytochrome P450 93A3 OS=Glycine max GN=CYP93A3 PE=2 SV=1	G7KUG5_MEDTR Cytochrome P450 OS=Medicago truncatula GN=MTR_7g092620 PE=3 SV=1
Ca_14218	31039801-31041259	4	IPR001128; Cytochrome P450 IPR002401; Cytochrome P450, E-class, group I IPR017972; Cytochrome P450, conserved site	GO:0004497; monooxygenase activity; Molecular Function GO:0005506; iron ion binding; Molecular Function GO:0009055; electron carrier activity; Molecular Function GO:0020037; heme binding; Molecular Function GO:0055114; oxidation-reduction process; Biological Process	CYP705A3; electron carrier/ heme binding / iron ion binding / monooxygenase/ oxygen binding; K00517 [EC:1.14.-.-]	C93A3_SOYBN Cytochrome P450 93A3 OS=Glycine max GN=CYP93A3 PE=2 SV=1	B9T2D1_RICCO Cytochrome P450, putative OS=Ricinus communis GN=RCOM_0405180 PE=3 SV=1
Ca_14219	31065486-31066721	4	IPR001128; Cytochrome P450 IPR002401; Cytochrome P450, E-class, group I IPR017972; Cytochrome P450, conserved site	GO:0004497; monooxygenase activity; Molecular Function GO:0005506; iron ion binding; Molecular Function GO:0009055; electron carrier activity; Molecular Function GO:0020037; heme binding; Molecular Function GO:0055114; oxidation-reduction process; Biological Process	F3'H, VvF3'h4; flavonoid 3' hydroxylase; K05280 flavonoid 3'-monooxygenase [EC:1.14.13.21]	C93A1_SOYBN Cytochrome P450 93A1 OS=Glycine max GN=CYP93A1 PE=2 SV=1	B9II24_POPTR Cytochrome P450 OS=Populus trichocarpa GN=CYP93A4 PE=3 SV=1
Ca_14220	31087959-31090690	4	-	-	-	-	A5BU47_VITVI Putative uncharacterized protein OS=Vitis vinifera GN=VITISV_003642 PE=4 SV=1
Ca_14221	31103920-31105976	4	IPR001806; Ras GTPase IPR002041; Ran GTPase IPR003577; Ras small GTPase, Ras type IPR003578; Small GTPase, Rho type IPR003579; Ras small GTPase, Rab type IPR006688; ADP-ribosylation factor IPR013753; Ras IPR020851; Small GTPase	GO:0003924; GTPase activity; Molecular Function GO:0005525; GTP binding; Molecular Function GO:0005622; intracellular; Cellular Component GO:0006886; intracellular protein transport; Biological Process GO:0006913; nucleocytoplasmic transport; Biological Process GO:0007165; signal transduction; Biological Process GO:0007264; small GTPase mediated signal transduction; Biological Process GO:0015031;…	RABA4D; RABA4D (RAB GTPASE HOMOLOG A4D); GTP binding; K07976 Rab family, other	RAA4D_ARATH Ras-related protein RABA4d OS=Arabidopsis thaliana GN=RABA4D PE=1 SV=1	D7KZQ3_ARALL Predicted protein OS=Arabidopsis lyrata subsp. lyrata GN=ARALYDRAFT_672041 PE=3 SV=1
Ca_14222	31131802-31134918	4	IPR001584; Integrase, catalytic core IPR013103; Reverse transcriptase, RNA-dependent DNA polymerase	GO:0003677; DNA binding; Molecular Function GO:0015074; DNA integration; Biological Process	Os11g0157000; K12619 5'-3' exoribonuclease 2 [EC:3.1.13.-]	POLX_TOBAC Retrovirus-related Pol polyprotein from transposon TNT 1-94 OS=Nicotiana tabacum PE=2 SV=1	Q710T7_POPDE Gag-pol polyprotein OS=Populus deltoides GN=60I2G14 PE=4 SV=1
Ca_14223	31138669-31141462	4	IPR001092; Helix-loop-helix DNA-binding domain	GO:0030528; transcription regulator activity; Molecular Function GO:0045449; regulation of transcription; Biological Process	PIF3; PIF3 (PHYTOCHROME INTERACTING FACTOR 3); DNA binding / protein binding / transcription factor/ transcription regulator; K12126 phytochrome-interacting factor 3	BH130_ARATH Transcription factor bHLH130 OS=Arabidopsis thaliana GN=BHLH130 PE=1 SV=1	B9T2D6_RICCO DNA binding protein, putative OS=Ricinus communis GN=RCOM_0405730 PE=4 SV=1
Ca_14224	31195814-31199435	4	IPR000719; Protein kinase, catalytic domain IPR001611; Leucine-rich repeat IPR002290; Serine/threonine-protein kinase domain IPR013210; Leucine-rich repeat-containing N-terminal, type 2 IPR017442; Serine/threonine-protein kinase-like domain IPR020635; Tyrosine-protein kinase, catalytic domain	GO:0004672; protein kinase activity; Molecular Function GO:0004674; protein serine/threonine kinase activity; Molecular Function GO:0005515; protein binding; Molecular Function GO:0005524; ATP binding; Molecular Function GO:0006468; protein phosphorylation; Biological Process	BRI1; BRI1 (BRASSINOSTEROID INSENSITIVE 1); kinase/ protein binding / protein heterodimerization/ protein homodimerization/ protein kinase/ protein serine/threonine kinase; K13415 protein brassinosteroid insensitive 1 [EC:2.7.10.1 2.7.11.1]	Y1668_ARATH Probable inactive leucine-rich repeat receptor-like protein kinase At1g66830 OS=Arabidopsis thaliana GN=At1g66830 PE=1 SV=1	F6HL66_VITVI Putative uncharacterized protein OS=Vitis vinifera GN=VIT_08s0007g07820 PE=4 SV=1
Ca_14225	31208988-31211472	4	IPR019557; Aminotransferase-like, plant mobile domain	-	-	-	Q2HTA0_MEDTR IMP dehydrogenase/GMP reductase, related OS=Medicago truncatula GN=MtrDRAFT_AC150776g6v2 PE=4 SV=1
Ca_14226	31216781-31219889	4	IPR003323; Ovarian tumour, otubain	-	hypothetical protein; K13719 ubiquitin thioesterase OTU1 [EC:3.1.2.-]	OTU_ARATH OTU domain-containing protein At3g57810 OS=Arabidopsis thaliana GN=At3g57810 PE=2 SV=1	C6TKI3_SOYBN Putative uncharacterized protein OS=Glycine max PE=2 SV=1
Ca_14227	31225436-31228234	4	IPR001327; Pyridine nucleotide-disulphide oxidoreductase, NAD-binding region IPR013027; FAD-dependent pyridine nucleotide-disulphide oxidoreductase	GO:0016491; oxidoreductase activity; Molecular Function GO:0050660; flavin adenine dinucleotide binding; Molecular Function GO:0055114; oxidation-reduction process; Biological Process	Rotenone-insensitive NADH-ubiquinone oxidoreductase, mitochondrial precursor, putative (EC:1.6.5.3); K03885 NADH dehydrogenase [EC:1.6.99.3]	NDH_DICDI Probable NADH dehydrogenase OS=Dictyostelium discoideum GN=DDB_G0270104 PE=3 SV=2	G7JQS9_MEDTR External NADH-ubiquinone oxidoreductase OS=Medicago truncatula GN=MTR_4g090580 PE=4 SV=1
Ca_14228	31244941-31247561	4	-	-	-	-	A5BU47_VITVI Putative uncharacterized protein OS=Vitis vinifera GN=VITISV_003642 PE=4 SV=1
Ca_14229	31256014-31258067	4	IPR002885; Pentatricopeptide repeat	-	Cell division protein ftsH, putative (EC:3.6.4.3); K03798 cell division protease FtsH [EC:3.4.24.-]	PP227_ARATH Putative pentatricopeptide repeat-containing protein At3g13770, mitochondrial OS=Arabidopsis thaliana GN=PCMP-H85 PE=3 SV=1	G7I998_MEDTR Pentatricopeptide repeat protein OS=Medicago truncatula GN=MTR_1g059280 PE=4 SV=1
Ca_14230	31262741-31264603	4	IPR002885; Pentatricopeptide repeat	-	Cell division protein ftsH, putative (EC:3.6.4.3); K03798 cell division protease FtsH [EC:3.4.24.-]	PP350_ARATH Pentatricopeptide repeat-containing protein At4g35130, chloroplastic OS=Arabidopsis thaliana GN=PCMP-H27 PE=2 SV=1	B9T607_RICCO Pentatricopeptide repeat-containing protein, putative OS=Ricinus communis GN=RCOM_0160700 PE=4 SV=1
Ca_14231	31299709-31304931	4	IPR001092; Helix-loop-helix DNA-binding domain	GO:0030528; transcription regulator activity; Molecular Function GO:0045449; regulation of transcription; Biological Process	PIF3; PIF3 (PHYTOCHROME INTERACTING FACTOR 3); DNA binding / protein binding / transcription factor/ transcription regulator; K12126 phytochrome-interacting factor 3	BH060_ARATH Transcription factor bHLH60 OS=Arabidopsis thaliana GN=BHLH60 PE=2 SV=1	G7I997_MEDTR Transcription factor BEE OS=Medicago truncatula GN=MTR_1g059270 PE=4 SV=1
Ca_13102	38658697-38659611	4	IPR005202; Transcription factor GRAS	-	-	SCL1_ARATH Scarecrow-like protein 1 OS=Arabidopsis thaliana GN=SCL1 PE=2 SV=1	B9GTP1_POPTR GRAS family transcription factor OS=Populus trichocarpa GN=GRAS49 PE=4 SV=1
Ca_13101	38659617-38660501	4	IPR005202; Transcription factor GRAS	-	RGL2; RGL2 (RGA-LIKE 2); transcription factor; K14494 DELLA protein	SCL1_ARATH Scarecrow-like protein 1 OS=Arabidopsis thaliana GN=SCL1 PE=2 SV=1	D9ZJB0_MALDO SCL domain class transcription factor OS=Malus domestica GN=SCL1 PE=2 SV=1
Ca_13100	38662077-38668980	4	IPR006055; Exonuclease IPR013520; Exonuclease, RNase T/DNA polymerase III	GO:0004527; exonuclease activity; Molecular Function GO:0005622; intracellular; Cellular Component	rnase h, putative (EC:3.1.13.1); K14570 RNA exonuclease 1 [EC:3.1.-.-]	SDN5_ARATH Small RNA degrading nuclease 5 OS=Arabidopsis thaliana GN=SDN5 PE=2 SV=2	B9S2M9_RICCO Rnase h, putative OS=Ricinus communis GN=RCOM_0559410 PE=4 SV=1
Ca_13099	38672633-38680878	4	IPR002691; LIM binding protein	GO:0003712; transcription cofactor activity; Molecular Function GO:0005634; nucleus; Cellular Component GO:0007275; multicellular organismal development; Biological Process	-	SEUSS_ARATH Transcriptional corepressor SEUSS OS=Arabidopsis thaliana GN=SEU PE=1 SV=1	B9GTN7_POPTR Predicted protein OS=Populus trichocarpa GN=POPTRDRAFT_551368 PE=4 SV=1
Ca_13097	38755748-38759830	4	IPR004776; Auxin efflux carrier	GO:0016021; integral to membrane; Cellular Component GO:0055085; transmembrane transport; Biological Process	hypothetical protein LOC100250503; K13947 auxin efflux carrier family	PIN6_ARATH Probable auxin efflux carrier component 6 OS=Arabidopsis thaliana GN=PIN6 PE=2 SV=2	Q673E8_MEDTR Putative auxin efflux carrier protein 6 OS=Medicago truncatula GN=PIN6 PE=4 SV=1
Ca_13096	38770225-38771776	4	IPR005067; Fatty acid desaturase, type 2	GO:0006631; fatty acid metabolic process; Biological Process GO:0045300; acyl-[acyl-carrier-protein] desaturase activity; Molecular Function GO:0055114; oxidation-reduction process; Biological Process	stearoyl-ACP desaturase (EC:1.14.19.2); K03921 acyl-[acyl-carrier-protein] desaturase [EC:1.14.19.2]	STAD6_ARATH Acyl-[acyl-carrier-protein] desaturase 6, chloroplastic OS=Arabidopsis thaliana GN=S-ACP-DES6 PE=2 SV=2	Q9XFC1_LUPLU Stearoyl acyl carrier protein desaturase Lldd3A20 OS=Lupinus luteus PE=2 SV=1
Ca_13095	38781512-38782189	4	-	-	-	-	G7I4F2_MEDTR Putative uncharacterized protein OS=Medicago truncatula GN=MTR_1g008680 PE=4 SV=1
Ca_13094	38783310-38787724	4	IPR002495; Glycosyl transferase, family 8	GO:0016757; transferase activity, transferring glycosyl groups; Molecular Function	glycogenin, putative (EC:2.4.1.186); K00750 glycogenin glucosyltransferase [EC:2.4.1.186]	GLYG_RABIT Glycogenin-1 OS=Oryctolagus cuniculus GN=GYG1 PE=1 SV=3	F6H0A3_VITVI Putative uncharacterized protein OS=Vitis vinifera GN=VIT_18s0001g15580 PE=4 SV=1
Ca_13093	38817552-38819395	4	IPR003957; Transcription factor, CBFA/NFYB, DNA topoisomerase IPR003958; Transcription factor CBF/NF-Y/archaeal histone	GO:0003677; DNA binding; Molecular Function GO:0005622; intracellular; Cellular Component GO:0043565; sequence-specific DNA binding; Molecular Function	hypothetical protein; K08065 nuclear transcription factor Y, beta	NFYB6_ARATH Nuclear transcription factor Y subunit B-6 OS=Arabidopsis thaliana GN=NFYB6 PE=1 SV=2	F6LIE1_PICAB CCAAT-box binding factor HAP3-like protein OS=Picea abies GN=HAP3A PE=2 SV=1
Ca_13092	38830621-38831526	4	IPR005304; Ribosomal biogenesis, methyltransferase, EMG1/NEP1	-	Nucleolar essential protein, putative; K14568 essential for mitotic growth 1	NEP1_MOUSE Ribosomal RNA small subunit methyltransferase NEP1 OS=Mus musculus GN=Emg1 PE=1 SV=1	G7JBJ8_MEDTR Putative uncharacterized protein OS=Medicago truncatula GN=MTR_3g096190 PE=4 SV=1
Ca_13091	38832955-38836837	4	-	-	hypothetical protein; K01930 folylpolyglutamate synthase [EC:6.3.2.17]	YDJ7_SCHPO Uncharacterized protein C57A10.07 OS=Schizosaccharomyces pombe (strain 972 / ATCC 24843) GN=SPAC57A10.07 PE=2 SV=1	B7FJT1_MEDTR Putative uncharacterized protein OS=Medicago truncatula PE=2 SV=1
Ca_13090	38839044-38839400	4	-	-	-	-	-
Ca_13089	38864426-38864767	4	IPR003957; Transcription factor, CBFA/NFYB, DNA topoisomerase IPR003958; Transcription factor CBF/NF-Y/archaeal histone	GO:0003677; DNA binding; Molecular Function GO:0005622; intracellular; Cellular Component GO:0043565; sequence-specific DNA binding; Molecular Function	hypothetical protein; K08065 nuclear transcription factor Y, beta	NFYB6_ARATH Nuclear transcription factor Y subunit B-6 OS=Arabidopsis thaliana GN=NFYB6 PE=1 SV=2	G7ICG4_MEDTR Transcription factor LEC1-A OS=Medicago truncatula GN=MTR_1g039040 PE=4 SV=1
Ca_13088	38867589-38871251	4	IPR014830; Glycolipid transfer protein domain	GO:0005737; cytoplasm; Cellular Component GO:0017089; glycolipid transporter activity; Molecular Function GO:0046836; glycolipid transport; Biological Process GO:0051861; glycolipid binding; Molecular Function	-	-	A5AP40_VITVI Putative uncharacterized protein OS=Vitis vinifera GN=VITISV_036543 PE=4 SV=1
Ca_13087	38887951-38890294	4	IPR000719; Protein kinase, catalytic domain IPR001611; Leucine-rich repeat IPR002290; Serine/threonine-protein kinase domain IPR013210; Leucine-rich repeat-containing N-terminal, type 2 IPR017441; Protein kinase, ATP binding site IPR017442; Serine/threonine-protein kinase-like domain IPR020635; Tyrosine-protein kinase, catalytic domain	GO:0004672; protein kinase activity; Molecular Function GO:0004674; protein serine/threonine kinase activity; Molecular Function GO:0005515; protein binding; Molecular Function GO:0005524; ATP binding; Molecular Function GO:0006468; protein phosphorylation; Biological Process	hypothetical protein; K13415 protein brassinosteroid insensitive 1 [EC:2.7.10.1 2.7.11.1]	Y4374_ARATH Probable inactive receptor kinase At4g23740 OS=Arabidopsis thaliana GN=At4g23740 PE=1 SV=1	G7J683_MEDTR Leucine-rich repeat receptor-like protein kinase OS=Medicago truncatula GN=MTR_3g090660 PE=4 SV=1
Ca_13086	38917793-38919465	4	IPR005828; General substrate transporter IPR020846; Major facilitator superfamily	GO:0005215; transporter activity; Molecular Function GO:0006810; transport; Biological Process GO:0016021; integral to membrane; Cellular Component GO:0055085; transmembrane transport; Biological Process	inorganic phosphate transporter, putative; K08176 MFS transporter, PHS family, inorganic phosphate transporter	PT111_ORYSJ Inorganic phosphate transporter 1-11 OS=Oryza sativa subsp. japonica GN=PHT1-11 PE=2 SV=1	Q8GSG4_MEDTR Phosphate transporter PT4 OS=Medicago truncatula PE=2 SV=1
Ca_13085	38926236-38930089	4	-	-	-	PDV1_ARATH Plastid division protein PDV1 OS=Arabidopsis thaliana GN=PDV1 PE=1 SV=1	A9PED9_POPTR Putative uncharacterized protein OS=Populus trichocarpa PE=2 SV=1
Ca_13084	38947878-38948891	4	IPR001471; Pathogenesis-related transcriptional factor/ERF, DNA-binding	GO:0003700; sequence-specific DNA binding transcription factor activity; Molecular Function GO:0006355; regulation of transcription, DNA-dependent; Biological Process	hypothetical protein LOC100246641; K09286 EREBP-like factor	CRF4_ARATH Ethylene-responsive transcription factor CRF4 OS=Arabidopsis thaliana GN=CRF4 PE=2 SV=2	G7J693_MEDTR Ethylene responsive transcription factor 1a OS=Medicago truncatula GN=MTR_3g090760 PE=4 SV=1
Ca_13083	38959759-38962746	4	IPR000608; Ubiquitin-conjugating enzyme, E2 IPR023313; Ubiquitin-conjugating enzyme, active site	GO:0016881; acid-amino acid ligase activity; Molecular Function GO:0043687; post-translational protein modification; Biological Process	hypothetical protein; K06689 ubiquitin-conjugating enzyme E2 D/E [EC:6.3.2.19]	UBC10_ARATH Ubiquitin-conjugating enzyme E2 10 OS=Arabidopsis thaliana GN=UBC10 PE=1 SV=1	C6SX33_SOYBN Putative uncharacterized protein OS=Glycine max PE=2 SV=1
Ca_13082	38964826-38967846	4	IPR000608; Ubiquitin-conjugating enzyme, E2 IPR023313; Ubiquitin-conjugating enzyme, active site	GO:0016881; acid-amino acid ligase activity; Molecular Function GO:0043687; post-translational protein modification; Biological Process	hypothetical protein; K06689 ubiquitin-conjugating enzyme E2 D/E [EC:6.3.2.19]	UBC9_ARATH SUMO-conjugating enzyme UBC9 OS=Arabidopsis thaliana GN=UBC9 PE=1 SV=1	C6SX33_SOYBN Putative uncharacterized protein OS=Glycine max PE=2 SV=1
Ca_13081	38975584-38982338	4	IPR001645; Folylpolyglutamate synthetase IPR013221; Mur ligase, central IPR018109; Folylpolyglutamate synthetase, conserved site	GO:0004326; tetrahydrofolylpolyglutamate synthase activity; Molecular Function GO:0005524; ATP binding; Molecular Function GO:0009058; biosynthetic process; Biological Process GO:0009396; folic acid-containing compound biosynthetic process; Biological Process	GLA1; GLA1 (GLOBULAR ARREST1); dihydrofolate synthase (EC:6.3.2.12); K01930 folylpolyglutamate synthase [EC:6.3.2.17]	FOLC_BACSU Folylpolyglutamate synthase OS=Bacillus subtilis GN=folC PE=3 SV=2	G7L1S8_MEDTR Folylpolyglutamate synthase OS=Medicago truncatula GN=MTR_7g100940 PE=4 SV=1
Ca_09142	44731417-44734017	4	IPR006094; FAD linked oxidase, N-terminal IPR015345; Cytokinin dehydrogenase 1, FAD/cytokinin binding domain IPR016166; FAD-binding, type 2	GO:0003824; catalytic activity; Molecular Function GO:0009690; cytokinin metabolic process; Biological Process GO:0016491; oxidoreductase activity; Molecular Function GO:0019139; cytokinin dehydrogenase activity; Molecular Function GO:0050660; flavin adenine dinucleotide binding; Molecular Function GO:0055114; oxidation-reduction process; Biological Process	cytokinin oxidase (EC:1.5.99.12); K00279 cytokinin dehydrogenase [EC:1.5.99.12]	CKX7_ARATH Cytokinin dehydrogenase 7 OS=Arabidopsis thaliana GN=CKX7 PE=1 SV=1	A0MQ40_PEA Cytokinin oxidase/dehydrogenase 1 OS=Pisum sativum GN=CKX1 PE=2 SV=1
Ca_09143	44752162-44759681	4	IPR001810; F-box domain, cyclin-like IPR006553; Leucine-rich repeat, cysteine-containing subtype	GO:0005515; protein binding; Molecular Function	NV10660; similar to ENSANGP00000010053; K10268 F-box and leucine-rich repeat protein 2/20	FBL15_ARATH F-box/LRR-repeat protein 15 OS=Arabidopsis thaliana GN=FBL15 PE=1 SV=2	G7I915_MEDTR F-box/LRR-repeat protein OS=Medicago truncatula GN=MTR_1g015450 PE=4 SV=1
Ca_09144	44782438-44789195	4	IPR000719; Protein kinase, catalytic domain IPR001611; Leucine-rich repeat IPR002290; Serine/threonine-protein kinase domain IPR003591; Leucine-rich repeat, typical subtype IPR008271; Serine/threonine-protein kinase, active site IPR013210; Leucine-rich repeat-containing N-terminal, type 2 IPR017441; Protein kinase, ATP binding site IPR017442; Serine/threonine-protein kinase-like domain IPR020635;…	GO:0004672; protein kinase activity; Molecular Function GO:0004674; protein serine/threonine kinase activity; Molecular Function GO:0005515; protein binding; Molecular Function GO:0005524; ATP binding; Molecular Function GO:0006468; protein phosphorylation; Biological Process	CLV1; CLV1 (CLAVATA 1); ATP binding / kinase/ protein serine/threonine kinase/ receptor signaling protein serine/threonine kinase; K00924 [EC:2.7.1.-]	ERECT_ARATH LRR receptor-like serine/threonine-protein kinase ERECTA OS=Arabidopsis thaliana GN=ERECTA PE=1 SV=1	G7I923_MEDTR LRR receptor-like serine/threonine-protein kinase ERECTA OS=Medicago truncatula GN=MTR_1g015530 PE=3 SV=1
Ca_09145	44790980-44810232	4	IPR013583; Phosphoribosyltransferase C-terminal	-	ACAN, AGC1; aggrecan; K06792 aggrecan 1	MUC1_HUMAN Mucin-1 OS=Homo sapiens GN=MUC1 PE=1 SV=3	C9ZTZ8_TRYB9 Putative uncharacterized protein (Fragment) OS=Trypanosoma brucei gambiense (strain MHOM/CI/86/DAL972) GN=TbgDal_VII7640 PE=4 SV=1
Ca_09146	44811768-44818776	4	IPR000048; IQ motif, EF-hand binding site IPR001609; Myosin head, motor domain	GO:0003774; motor activity; Molecular Function GO:0005515; protein binding; Molecular Function GO:0005524; ATP binding; Molecular Function GO:0016459; myosin complex; Cellular Component	myosin class 11-1 (ISS); K03165 DNA topoisomerase III [EC:5.99.1.2]	MYOJ_DICDI Myosin-J heavy chain OS=Dictyostelium discoideum GN=myoJ PE=4 SV=2	G7I929_MEDTR Myosin-like protein OS=Medicago truncatula GN=MTR_1g015620 PE=4 SV=1
Ca_09147	44824161-44830486	4	IPR002710; Dilute IPR018444; Dil domain	GO:0005515; protein binding; Molecular Function	myosin class 11-1 (ISS); K03165 DNA topoisomerase III [EC:5.99.1.2]	MYO5A_CHICK Unconventional myosin-Va OS=Gallus gallus GN=MYO5A PE=1 SV=1	D7STY0_VITVI Putative uncharacterized protein OS=Vitis vinifera GN=VIT_04s0008g01990 PE=4 SV=1
Ca_09148	44831982-44833848	4	-	-	-	-	B7FGG0_MEDTR Putative uncharacterized protein OS=Medicago truncatula PE=2 SV=1
Ca_09151	44866798-44871574	4	IPR013217; Methyltransferase type 12 IPR019410; Nicotinamide N-methyltransferase, putative	-	Os03g0143000; K00599 [EC:2.1.1.-]	METL6_RAT Methyltransferase-like protein 6 OS=Rattus norvegicus GN=Mettl6 PE=2 SV=1	G7I9V1_MEDTR Methyltransferase-like protein OS=Medicago truncatula GN=MTR_1g015770 PE=4 SV=1
Ca_09152	44900629-44900937	4	IPR021899; Protein of unknown function DUF3511	-	-	-	C6SX84_SOYBN Putative uncharacterized protein OS=Glycine max PE=4 SV=1
Ca_09153	44902826-44907691	4	IPR008521; Protein of unknown function DUF803	-	-	-	G7I9V4_MEDTR Putative uncharacterized protein OS=Medicago truncatula GN=MTR_1g015820 PE=4 SV=1
Ca_09154	44909560-44912324	4	IPR005269; Cytokinin riboside 5'-monophosphate phosphoribohydrolase LOG	-	hypothetical protein; K06966	LOG8_ARATH Cytokinin riboside 5'-monophosphate phosphoribohydrolase LOG8 OS=Arabidopsis thaliana GN=LOG8 PE=1 SV=1	G7I9V5_MEDTR Lysine decarboxylase-like protein OS=Medicago truncatula GN=MTR_1g015830 PE=4 SV=1
Ca_09155	44918196-44921366	4	IPR001128; Cytochrome P450	GO:0004497; monooxygenase activity; Molecular Function GO:0005506; iron ion binding; Molecular Function GO:0009055; electron carrier activity; Molecular Function GO:0020037; heme binding; Molecular Function	Os06g0565100; K00517 [EC:1.14.-.-]	CP17A_HUMAN Steroid 17-alpha-hydroxylase/17,20 lyase OS=Homo sapiens GN=CYP17A1 PE=1 SV=1	G7I9V8_MEDTR Cytochrome P450 OS=Medicago truncatula GN=MTR_1g015860 PE=3 SV=1
Ca_09156	44940503-44940952	4	IPR002109; Glutaredoxin IPR014025; Glutaredoxin subgroup	GO:0009055; electron carrier activity; Molecular Function GO:0015035; protein disulfide oxidoreductase activity; Molecular Function GO:0045454; cell redox homeostasis; Biological Process	hypothetical protein LOC100244121; K03676 glutaredoxin 3	GRXC6_ARATH Glutaredoxin-C6 OS=Arabidopsis thaliana GN=GRXC6 PE=2 SV=2	G7I9W1_MEDTR Glutaredoxin OS=Medicago truncatula GN=MTR_1g015890 PE=4 SV=1
Ca_09157	44945245-44948331	4	IPR001362; Glycoside hydrolase, family 32 IPR013148; Glycosyl hydrolases family 32, N-terminal IPR013189; Glycosyl hydrolase family 32, C-terminal	GO:0004553; hydrolase activity, hydrolyzing O-glycosyl compounds; Molecular Function GO:0005975; carbohydrate metabolic process; Biological Process	hypothetical protein; K01193 beta-fructofuranosidase [EC:3.2.1.26]	INV3_ARATH Beta-fructofuranosidase, insoluble isoenzyme CWINV3 OS=Arabidopsis thaliana GN=CWINV3 PE=1 SV=2	G7I9W3_MEDTR Beta-fructofuranosidase, insoluble isoenzyme CWINV1 OS=Medicago truncatula GN=MTR_1g015910 PE=3 SV=1
Ca_09158	44951623-44952609	4	IPR007087; Zinc finger, C2H2-type IPR015880; Zinc finger, C2H2-like IPR021139; Domain of unknown function DUF88	GO:0005622; intracellular; Cellular Component GO:0008270; zinc ion binding; Molecular Function	-	-	G7I9W5_MEDTR Putative uncharacterized protein OS=Medicago truncatula GN=MTR_1g015930 PE=4 SV=1
Ca_09159	44952990-44955500	4	IPR001362; Glycoside hydrolase, family 32 IPR013148; Glycosyl hydrolases family 32, N-terminal IPR013189; Glycosyl hydrolase family 32, C-terminal	GO:0004553; hydrolase activity, hydrolyzing O-glycosyl compounds; Molecular Function GO:0005975; carbohydrate metabolic process; Biological Process	hypothetical protein; K01193 beta-fructofuranosidase [EC:3.2.1.26]	INV3_ARATH Beta-fructofuranosidase, insoluble isoenzyme CWINV3 OS=Arabidopsis thaliana GN=CWINV3 PE=1 SV=2	G7I9W8_MEDTR Beta-fructofuranosidase, insoluble isoenzyme OS=Medicago truncatula GN=MTR_1g015970 PE=3 SV=1
Ca_09160	44966055-44968703	4	IPR007087; Zinc finger, C2H2-type IPR015880; Zinc finger, C2H2-like	GO:0005622; intracellular; Cellular Component GO:0008270; zinc ion binding; Molecular Function	hypothetical protein; K09202 regulatory protein SWI5	MGP_ARATH Zinc finger protein MAGPIE OS=Arabidopsis thaliana GN=MGP PE=1 SV=1	F6H3N1_VITVI Putative uncharacterized protein OS=Vitis vinifera GN=VIT_04s0008g01160 PE=4 SV=1
Ca_09161	44980273-44982776	4	IPR001375; Peptidase S9, prolyl oligopeptidase, catalytic domain	GO:0006508; proteolysis; Biological Process GO:0008236; serine-type peptidase activity; Molecular Function	hypothetical protein LOC100257601; K06889	-	G7I9X2_MEDTR Putative uncharacterized protein OS=Medicago truncatula GN=MTR_1g016050 PE=4 SV=1
Ca_09162	44988690-44990048	4	IPR001199; Cytochrome b5 IPR005804; Fatty acid desaturase, type 1	GO:0006629; lipid metabolic process; Biological Process GO:0016491; oxidoreductase activity; Molecular Function GO:0020037; heme binding; Molecular Function GO:0055114; oxidation-reduction process; Biological Process	hypothetical protein; K13076 delta8-fatty-acid desaturase [EC:1.14.19.4]	FADS3_BOVIN Fatty acid desaturase 3 OS=Bos taurus GN=FADS3 PE=2 SV=1	G7I9X4_MEDTR Delta-6-desaturase OS=Medicago truncatula GN=MTR_1g016070 PE=4 SV=1
Ca_09163	44994763-44997594	4	IPR008901; Ceramidase	GO:0006672; ceramide metabolic process; Biological Process GO:0016021; integral to membrane; Cellular Component GO:0016811; hydrolase activity, acting on carbon-nitrogen (but not peptide) bonds, in linear amides; Molecular Function	-	-	G7I9X5_MEDTR Putative uncharacterized protein OS=Medicago truncatula GN=MTR_1g016080 PE=4 SV=1
Ca_09164	45008747-45009694	4	IPR008480; Protein of unknown function DUF761, plant	-	-	-	G7I9X7_MEDTR Putative uncharacterized protein OS=Medicago truncatula GN=MTR_1g016100 PE=4 SV=1
Ca_09165	45020124-45023649	4	IPR000808; Mrp, conserved site IPR019591; ATPase-like, ParA/MinD	GO:0005524; ATP binding; Molecular Function	hypothetical protein; K03593 ATP-binding protein involved in chromosome partitioning	NUBP1_DICDI Cytosolic Fe-S cluster assembly factor NUBP1 homolog OS=Dictyostelium discoideum GN=nubp1 PE=3 SV=1	G7I9X8_MEDTR Cytosolic Fe-S cluster assembly factor nbp35 OS=Medicago truncatula GN=MTR_1g016110 PE=4 SV=1
Ca_09166	45033444-45034499	4	IPR003689; Zinc/iron permease	GO:0016020; membrane; Cellular Component GO:0030001; metal ion transport; Biological Process GO:0046873; metal ion transmembrane transporter activity; Molecular Function GO:0055085; transmembrane transport; Biological Process	zinc/iron transporter, putative (EC:1.3.1.74); K14709 solute carrier family 39 (zinc transporter), member 1/2/3	ZIP4_ARATH Zinc transporter 4, chloroplastic OS=Arabidopsis thaliana GN=ZIP4 PE=2 SV=1	Q6VM17_MEDTR Metal transport protein OS=Medicago truncatula GN=ZIP5 PE=2 SV=1
Ca_09167	45052381-45053943	4	IPR000679; Zinc finger, GATA-type	GO:0003700; sequence-specific DNA binding transcription factor activity; Molecular Function GO:0006355; regulation of transcription, DNA-dependent; Biological Process GO:0008270; zinc ion binding; Molecular Function GO:0043565; sequence-specific DNA binding; Molecular Function	-	GAT22_ARATH Putative GATA transcription factor 22 OS=Arabidopsis thaliana GN=GATA22 PE=2 SV=1	G7I9Y4_MEDTR GATA transcription factor OS=Medicago truncatula GN=MTR_1g016170 PE=4 SV=1
Ca_09168	45069934-45074704	4	IPR000767; Disease resistance protein IPR002182; NB-ARC	GO:0005524; ATP binding; Molecular Function GO:0006915; apoptosis; Biological Process GO:0006952; defense response; Biological Process	hypothetical protein LOC100252764; K13457 disease resistance protein RPM1	RPM1_ARATH Disease resistance protein RPM1 OS=Arabidopsis thaliana GN=RPM1 PE=1 SV=1	G7I9Y8_MEDTR NBS-containing resistance-like protein OS=Medicago truncatula GN=MTR_1g016210 PE=4 SV=1
Ca_09169	45081537-45089394	4	IPR020580; Glycine cleavage system P-protein, N-terminal IPR020581; Glycine cleavage system P protein	GO:0004375; glycine dehydrogenase (decarboxylating) activity; Molecular Function GO:0055114; oxidation-reduction process; Biological Process	hypothetical protein LOC100266170; K00281 glycine dehydrogenase [EC:1.4.4.2]	GCSP_PEA Glycine dehydrogenase [decarboxylating], mitochondrial OS=Pisum sativum GN=GDCSP PE=1 SV=1	G7I9Z0_MEDTR Glycine dehydrogenase P protein OS=Medicago truncatula GN=MTR_1g016230 PE=3 SV=1
Ca_09170	45105345-45106292	4	-	-	-	-	G7I9Z4_MEDTR Putative uncharacterized protein OS=Medicago truncatula GN=MTR_1g016270 PE=4 SV=1
Ca_09171	45109427-45113380	4	-	-	-	CHUP1_ARATH Protein CHUP1, chloroplastic OS=Arabidopsis thaliana GN=CHUP1 PE=1 SV=1	G7IB73_MEDTR Chloroplast unusual positioning 1A OS=Medicago truncatula GN=MTR_1g016290 PE=4 SV=1
Ca_09172	45116922-45120863	4	-	-	protein kinase family protein; K04424 sterile alpha motif and leucine zipper containing kinase AZK [EC:2.7.11.25]	CTR1_ARATH Serine/threonine-protein kinase CTR1 OS=Arabidopsis thaliana GN=CTR1 PE=1 SV=1	G7IB74_MEDTR MAP kinase kinase kinase OS=Medicago truncatula GN=MTR_1g016300 PE=3 SV=1
Ca_09173	45121211-45125527	4	IPR000719; Protein kinase, catalytic domain IPR001245; Serine-threonine/tyrosine-protein kinase IPR002290; Serine/threonine-protein kinase domain IPR008271; Serine/threonine-protein kinase, active site IPR017441; Protein kinase, ATP binding site IPR020635; Tyrosine-protein kinase, catalytic domain	GO:0004672; protein kinase activity; Molecular Function GO:0004674; protein serine/threonine kinase activity; Molecular Function GO:0005524; ATP binding; Molecular Function GO:0006468; protein phosphorylation; Biological Process	protein kinase family protein; K04424 sterile alpha motif and leucine zipper containing kinase AZK [EC:2.7.11.25]	CTR1_ARATH Serine/threonine-protein kinase CTR1 OS=Arabidopsis thaliana GN=CTR1 PE=1 SV=1	G7IB74_MEDTR MAP kinase kinase kinase OS=Medicago truncatula GN=MTR_1g016300 PE=3 SV=1
Ca_09174	45126526-45128556	4	IPR009631; Uncharacterised protein family Ycf36	-	-	YCF36_PORPU Uncharacterized protein ycf36 OS=Porphyra purpurea GN=ycf36 PE=3 SV=1	G7IB80_MEDTR Putative uncharacterized protein OS=Medicago truncatula GN=MTR_1g016360 PE=4 SV=1
Ca_09175	45132112-45133945	4	IPR008496; Protein of unknown function DUF778	-	-	RTE1_ARATH Protein REVERSION-TO-ETHYLENE SENSITIVITY1 OS=Arabidopsis thaliana GN=RTE1 PE=1 SV=1	B7FIL3_MEDTR Transmembrane protein OS=Medicago truncatula GN=MTR_1g016390 PE=2 SV=1
Ca_09176	45134952-45137304	4	-	-	-	-	G7IB84_MEDTR Putative uncharacterized protein OS=Medicago truncatula GN=MTR_1g016410 PE=4 SV=1
Ca_10418	2830114-2832722	6	IPR002110; Ankyrin repeat IPR020683; Ankyrin repeat-containing domain	GO:0005515; protein binding; Molecular Function	ank3, ankyrin-G; ankyrin 3, node of Ranvier (ankyrin G); K10380 ankyrin	Y2168_ARATH Ankyrin repeat-containing protein At2g01680 OS=Arabidopsis thaliana GN=At2g01680 PE=1 SV=1	G7LAK9_MEDTR Ankyrin repeat-containing protein OS=Medicago truncatula GN=MTR_8g105260 PE=4 SV=1
Ca_10419	2835252-2840887	6	IPR004854; Ubiquitin fusion degradation protein UFD1	GO:0006511; ubiquitin-dependent protein catabolic process; Biological Process	hypothetical protein; K14016 ubiquitin fusion degradation protein 1	UFD1_RAT Ubiquitin fusion degradation protein 1 homolog OS=Rattus norvegicus GN=Ufd1l PE=1 SV=1	G7LAK8_MEDTR Ubiquitin fusion degradation protein OS=Medicago truncatula GN=MTR_8g105250 PE=4 SV=1
Ca_10429	2912703-2913095	6	IPR008417; B-cell receptor-associated 31-like	GO:0005783; endoplasmic reticulum; Cellular Component GO:0006886; intracellular protein transport; Biological Process GO:0016021; integral to membrane; Cellular Component	-	-	B7FMB6_MEDTR Putative uncharacterized protein OS=Medicago truncatula PE=2 SV=1
Ca_10428	2904769-2905917	6	IPR002902; Gnk2-homologous domain	-	-	CRR12_ARATH Cysteine-rich repeat secretory protein 12 OS=Arabidopsis thaliana GN=CRRSP12 PE=2 SV=2	G7LAI6_MEDTR Cysteine-rich repeat secretory protein OS=Medicago truncatula GN=MTR_8g104990 PE=4 SV=1
Ca_10443	3024663-3030348	6	IPR001701; Glycoside hydrolase, family 9 IPR018221; Glycoside hydrolase, family 9, active site	GO:0004553; hydrolase activity, hydrolyzing O-glycosyl compounds; Molecular Function GO:0005975; carbohydrate metabolic process; Biological Process	Os09g0530200; K01179 endoglucanase [EC:3.2.1.4]	GUN8_ARATH Endoglucanase 8 OS=Arabidopsis thaliana GN=CEL1 PE=2 SV=1	G7LAH3_MEDTR Endo-beta-1 4-glucanase OS=Medicago truncatula GN=MTR_8g104820 PE=4 SV=1
Ca_17437	57110969-57117208	6	IPR002905; N2,N2-dimethylguanosine tRNA methyltransferase	GO:0003723; RNA binding; Molecular Function GO:0004809; tRNA (guanine-N2-)-methyltransferase activity; Molecular Function GO:0008033; tRNA processing; Biological Process	hypothetical protein LOC100242902; K00555 tRNA (guanine-N2-)-methyltransferase [EC:2.1.1.32]	TRM1_ARATH Probable tRNA (guanine(26)-N(2))-dimethyltransferase 1 OS=Arabidopsis thaliana GN=At5g15810 PE=2 SV=3	A5BTI2_VITVI Putative uncharacterized protein OS=Vitis vinifera GN=VIT_14s0083g01090 PE=4 SV=1
Ca_10386	2540684-2541861	6	IPR000270; Phox/Bem1p	GO:0005515; protein binding; Molecular Function	-	-	G7KMK4_MEDTR Putative uncharacterized protein OS=Medicago truncatula GN=MTR_6g082400 PE=4 SV=1
Ca_10387	2546888-2550227	6	IPR001841; Zinc finger, RING-type IPR018957; Zinc finger, C3HC4 RING-type	GO:0005515; protein binding; Molecular Function GO:0008270; zinc ion binding; Molecular Function	Hypothetical protein CBG04193; K11982 E3 ubiquitin-protein ligase RNF115/126 [EC:6.3.2.19]	BB_ARATH E3 ubiquitin ligase BIG BROTHER OS=Arabidopsis thaliana GN=BB PE=1 SV=1	G7KMM3_MEDTR RING finger protein OS=Medicago truncatula GN=MTR_6g082620 PE=4 SV=1
Ca_10388	2559402-2563389	6	IPR003656; Zinc finger, BED-type predicted IPR007087; Zinc finger, C2H2-type IPR015880; Zinc finger, C2H2-like	GO:0003677; DNA binding; Molecular Function GO:0005622; intracellular; Cellular Component GO:0008270; zinc ion binding; Molecular Function	-	ZN207_HUMAN Zinc finger protein 207 OS=Homo sapiens GN=ZNF207 PE=1 SV=1	G7LCD1_MEDTR Zinc finger protein OS=Medicago truncatula GN=MTR_8g106220 PE=4 SV=1
Ca_10389	2568109-2569789	6	-	-	-	-	G7LCD0_MEDTR Putative uncharacterized protein OS=Medicago truncatula GN=MTR_8g106210 PE=4 SV=1
Ca_10390	2588205-2593341	6	IPR001789; Signal transduction response regulator, receiver domain IPR003594; ATPase-like, ATP-binding domain IPR003661; Signal transduction histidine kinase, subgroup 1, dimerisation/phosphoacceptor domain IPR004358; Signal transduction histidine kinase-related protein, C-terminal IPR005467; Signal transduction histidine kinase, core IPR006189; CHASE	GO:0000155; two-component sensor activity; Molecular Function GO:0000156; two-component response regulator activity; Molecular Function GO:0000160; two-component signal transduction system (phosphorelay); Biological Process GO:0004673; protein histidine kinase activity; Molecular Function GO:0005524; ATP binding; Molecular Function GO:0006355; regulation of transcription, DNA-dependent; Biologica…	similar to cytokinin receptor 1; K14489 arabidopsis histidine kinase 2/3/4 (cytokinin receptor) [EC:2.7.13.3]	AHK4_ARATH Histidine kinase 4 OS=Arabidopsis thaliana GN=AHK4 PE=1 SV=1	G7LCC3_MEDTR Histidine kinase OS=Medicago truncatula GN=MTR_8g106150 PE=4 SV=1
Ca_10391	2600923-2606373	6	IPR002015; Proteasome/cyclosome, regulatory subunit	-	hypothetical protein LOC100264792; K03032 26S proteasome regulatory subunit N2	PSMD1_HUMAN 26S proteasome non-ATPase regulatory subunit 1 OS=Homo sapiens GN=PSMD1 PE=1 SV=2	G7LCC0_MEDTR 26S proteasome non-ATPase regulatory subunit OS=Medicago truncatula GN=MTR_8g106120 PE=4 SV=1
Ca_10392	2609564-2612517	6	IPR000719; Protein kinase, catalytic domain IPR002290; Serine/threonine-protein kinase domain IPR003591; Leucine-rich repeat, typical subtype IPR008271; Serine/threonine-protein kinase, active site IPR013210; Leucine-rich repeat-containing N-terminal, type 2 IPR017441; Protein kinase, ATP binding site IPR017442; Serine/threonine-protein kinase-like domain IPR020635; Tyrosine-protein kinase, catal…	GO:0004672; protein kinase activity; Molecular Function GO:0004674; protein serine/threonine kinase activity; Molecular Function GO:0005524; ATP binding; Molecular Function GO:0006468; protein phosphorylation; Biological Process	TMK1; TMK1 (TRANSMEMBRANE KINASE 1); transmembrane receptor protein serine/threonine kinase; K00924 [EC:2.7.1.-]	TMK1_ARATH Probable receptor protein kinase TMK1 OS=Arabidopsis thaliana GN=TMK1 PE=2 SV=1	G7LCB8_MEDTR Kinase-like protein OS=Medicago truncatula GN=MTR_8g106100 PE=3 SV=1
Ca_10393	2617381-2628136	6	IPR021726; THO complex, subunitTHOC2, N-terminal	-	hypothetical protein LOC100254201; K12879 THO complex subunit 2	THOC2_CALJA THO complex subunit 2 OS=Callithrix jacchus GN=THOC2 PE=3 SV=1	G7LCB7_MEDTR THO complex subunit OS=Medicago truncatula GN=MTR_8g106090 PE=4 SV=1
Ca_10394	2630787-2637444	6	IPR021418; THO complex, subunitTHOC2, C-terminal	-	hypothetical protein LOC100254201; K12879 THO complex subunit 2	THOC2_CALMO THO complex subunit 2 OS=Callicebus moloch GN=THOC2 PE=3 SV=1	G7LCB7_MEDTR THO complex subunit OS=Medicago truncatula GN=MTR_8g106090 PE=4 SV=1
Ca_10395	2638352-2639632	6	IPR011417; ANTH IPR013809; Epsin-like, N-terminal	GO:0005543; phospholipid binding; Molecular Function	-	CAP7_ARATH Putative clathrin assembly protein At5g57200 OS=Arabidopsis thaliana GN=At5g57200 PE=2 SV=1	G7LBJ2_MEDTR Putative uncharacterized protein OS=Medicago truncatula GN=MTR_8g106040 PE=4 SV=1
Ca_10396	2641813-2642235	6	IPR000754; Ribosomal protein S9 IPR020574; Ribosomal protein S9, conserved site	GO:0003735; structural constituent of ribosome; Molecular Function GO:0005622; intracellular; Cellular Component GO:0005840; ribosome; Cellular Component GO:0006412; translation; Biological Process	ribosomal protein S9, putative; K02960 small subunit ribosomal protein S16e	RS16_GOSHI 40S ribosomal protein S16 OS=Gossypium hirsutum GN=RPS16 PE=2 SV=1	G7LBJ0_MEDTR 40S ribosomal protein S16 OS=Medicago truncatula GN=MTR_8g106020 PE=3 SV=1
Ca_10397	2648382-2648804	6	IPR000754; Ribosomal protein S9 IPR020574; Ribosomal protein S9, conserved site	GO:0003735; structural constituent of ribosome; Molecular Function GO:0005622; intracellular; Cellular Component GO:0005840; ribosome; Cellular Component GO:0006412; translation; Biological Process	ribosomal protein S9, putative; K02960 small subunit ribosomal protein S16e	RS16_GOSHI 40S ribosomal protein S16 OS=Gossypium hirsutum GN=RPS16 PE=2 SV=1	G7LBJ0_MEDTR 40S ribosomal protein S16 OS=Medicago truncatula GN=MTR_8g106020 PE=3 SV=1
Ca_10398	2652374-2656874	6	IPR001925; Porin, eukaryotic type	GO:0005741; mitochondrial outer membrane; Cellular Component GO:0006820; anion transport; Biological Process GO:0008308; voltage-gated anion channel activity; Molecular Function GO:0055085; transmembrane transport; Biological Process	hypothetical protein LOC100268104; K11518 mitochondrial import receptor subunit TOM40	TO401_ARATH Mitochondrial import receptor subunit TOM40 homolog 1 OS=Arabidopsis thaliana GN=TOM40-1 PE=1 SV=3	C5NTE7_SOYBN Rsdv1 resistance like protein OS=Glycine max GN=Rsdv1-like PE=4 SV=1
Ca_10399	2660690-2662497	6	IPR000315; Zinc finger, B-box IPR006734; Protein of unknown function DUF597	GO:0005622; intracellular; Cellular Component GO:0008270; zinc ion binding; Molecular Function	-	-	G7LBI1_MEDTR Putative uncharacterized protein OS=Medicago truncatula GN=MTR_8g105930 PE=4 SV=1
Ca_10400	2667578-2670730	6	IPR000504; RNA recognition motif domain IPR001395; Aldo/keto reductase	GO:0003676; nucleic acid binding; Molecular Function GO:0016491; oxidoreductase activity; Molecular Function GO:0055114; oxidation-reduction process; Biological Process	-	VIPI_SCHPO Protein vip1 OS=Schizosaccharomyces pombe (strain 972 / ATCC 24843) GN=vip1 PE=1 SV=1	G7LBH9_MEDTR Protein vip1 OS=Medicago truncatula GN=MTR_8g105910 PE=4 SV=1
Ca_10401	2671890-2676389	6	IPR013176; Protein of unknown function DUF1712, fungi	-	-	CCZ1_HUMAN Vacuolar fusion protein CCZ1 homolog OS=Homo sapiens GN=CCZ1 PE=1 SV=1	G7LBH8_MEDTR Putative uncharacterized protein OS=Medicago truncatula GN=MTR_8g105900 PE=4 SV=1
Ca_10402	2680516-2681467	6	IPR001163; Like-Sm ribonucleoprotein (LSM) domain IPR006649; Like-Sm ribonucleoprotein (LSM) domain, eukaryotic/archaea-type	-	hypothetical protein; K11096 small nuclear ribonucleoprotein D2	SMD2_DROME Probable small nuclear ribonucleoprotein Sm D2 OS=Drosophila melanogaster GN=SmD2 PE=3 SV=1	G7LBH6_MEDTR Small nuclear ribonucleoprotein-like protein OS=Medicago truncatula GN=MTR_8g105890 PE=4 SV=1
Ca_10403	2689266-2692111	6	IPR000534; Semialdehyde dehydrogenase, NAD-binding IPR012280; Semialdehyde dehydrogenase, dimerisation domain	GO:0005737; cytoplasm; Cellular Component GO:0006520; cellular amino acid metabolic process; Biological Process GO:0008652; cellular amino acid biosynthetic process; Biological Process GO:0016620; oxidoreductase activity, acting on the aldehyde or oxo group of donors, NAD or NADP as acceptor; Molecular Function GO:0046983; protein dimerization activity; Molecular Function GO:0051287; NAD or NADH …	aspartate semialdehyde dehydrogenase (EC:1.2.1.11); K00133 aspartate-semialdehyde dehydrogenase [EC:1.2.1.11]	DHAS_SYNY3 Aspartate-semialdehyde dehydrogenase OS=Synechocystis sp. (strain PCC 6803 / Kazusa) GN=asd PE=3 SV=2	G7LBH4_MEDTR Aspartate-semialdehyde dehydrogenase OS=Medicago truncatula GN=MTR_8g105860 PE=3 SV=1
Ca_10404	2705207-2707136	6	IPR019194; Transcription elognation factor Eaf, N-terminal	-	-	EAF_DROER Ell-associated factor Eaf OS=Drosophila erecta GN=Eaf PE=3 SV=2	G7LBH2_MEDTR Ell-associated factor Eaf OS=Medicago truncatula GN=MTR_8g105830 PE=4 SV=1
Ca_10405	2714757-2716449	6	IPR008217; Domain of unknown function DUF125, transmembrane	-	hypothetical protein ; K10610 DNA damage-binding protein 1	VIT1_ARATH Vacuolar iron transporter 1 OS=Arabidopsis thaliana GN=VIT1 PE=2 SV=1	G7LBG9_MEDTR Vacuolar iron transporter OS=Medicago truncatula GN=MTR_8g105790 PE=4 SV=1
Ca_10406	2718695-2720447	6	IPR000232; Heat shock factor (HSF)-type, DNA-binding	GO:0003700; sequence-specific DNA binding transcription factor activity; Molecular Function GO:0005634; nucleus; Cellular Component GO:0006355; regulation of transcription, DNA-dependent; Biological Process GO:0043565; sequence-specific DNA binding; Molecular Function	heat shock factor protein-like; K09414 heat shock transcription factor 1	HSFA8_ARATH Heat stress transcription factor A-8 OS=Arabidopsis thaliana GN=HSFA8 PE=2 SV=1	G7LBG8_MEDTR Heat stress transcription factor A-8 OS=Medicago truncatula GN=MTR_8g105780 PE=3 SV=1
Ca_10407	2735801-2739165	6	IPR001830; Glycosyl transferase, family 20 IPR003337; Trehalose-phosphatase	GO:0003824; catalytic activity; Molecular Function GO:0005992; trehalose biosynthetic process; Biological Process	hypothetical protein; K00697 alpha,alpha-trehalose-phosphate synthase (UDP-forming) [EC:2.4.1.15]; K01087 trehalose-phosphatase [EC:3.1.3.12]	TPS6_ARATH Alpha,alpha-trehalose-phosphate synthase [UDP-forming] 6 OS=Arabidopsis thaliana GN=TPS6 PE=1 SV=2	G7LBG6_MEDTR Alpha,alpha-trehalose-phosphate synthase OS=Medicago truncatula GN=MTR_8g105740 PE=4 SV=1
Ca_10408	2748156-2753269	6	IPR020864; Membrane attack complex component/perforin (MACPF) domain	-	-	MACP1_ARATH MACPF domain-containing protein At1g14780 OS=Arabidopsis thaliana GN=At1g14780 PE=2 SV=1	D7T8J2_VITVI Putative uncharacterized protein OS=Vitis vinifera GN=VIT_01s0011g05950 PE=4 SV=1
Ca_10409	2756829-2759001	6	IPR000889; Glutathione peroxidase	GO:0004602; glutathione peroxidase activity; Molecular Function GO:0006979; response to oxidative stress; Biological Process GO:0055114; oxidation-reduction process; Biological Process	glutathione peroxidase, putative (EC:1.11.1.12); K00432 glutathione peroxidase [EC:1.11.1.9]	GPX4_NICSY Probable phospholipid hydroperoxide glutathione peroxidase OS=Nicotiana sylvestris PE=2 SV=1	Q8L5Q6_CICAR Glutathione peroxidase OS=Cicer arietinum GN=phgpx PE=2 SV=1
Ca_10410	2766285-2768999	6	IPR001610; PAC motif IPR001810; F-box domain, cyclin-like IPR011498; Kelch repeat type 2 IPR013767; PAS fold	GO:0005515; protein binding; Molecular Function GO:0006355; regulation of transcription, DNA-dependent; Biological Process GO:0007165; signal transduction; Biological Process	hypothetical protein; K12116 flavin-binding kelch repeat F-box protein 1	ADO3_ARATH Adagio protein 3 OS=Arabidopsis thaliana GN=ADO3 PE=1 SV=1	G7LBF6_MEDTR Flavin-binding kelch repeat F-box OS=Medicago truncatula GN=MTR_8g105590 PE=4 SV=1
Ca_10411	2771149-2779068	6	IPR000375; Dynamin central domain IPR001401; Dynamin, GTPase domain IPR003130; Dynamin GTPase effector IPR019762; Dynamin, GTPase region, conserved site IPR020850; GTPase effector domain, GED IPR022812; Dynamin	GO:0003924; GTPase activity; Molecular Function GO:0005525; GTP binding; Molecular Function	dnm1; dynamin 1; K01528 dynamin GTPase [EC:3.6.5.5]	DRP1C_ARATH Dynamin-related protein 1C OS=Arabidopsis thaliana GN=DRP1C PE=1 SV=2	G7LBF4_MEDTR Dynamin-related protein 1C OS=Medicago truncatula GN=MTR_8g105580 PE=3 SV=1
Ca_10412	2780938-2782266	6	IPR003690; Mitochodrial transcription termination factor-related	-	hypothetical protein; K06674 structural maintenance of chromosome 2	-	B9MW46_POPTR Predicted protein OS=Populus trichocarpa GN=POPTRDRAFT_678072 PE=4 SV=1
Ca_10413	2786265-2791061	6	IPR009768; Myosin II heavy chain-like	-	-	MP702_ARATH Microtubule-associated protein 70-2 OS=Arabidopsis thaliana GN=MAP70.2 PE=1 SV=1	G7LBD9_MEDTR Microtubule associated protein Type 2 OS=Medicago truncatula GN=MTR_8g105350 PE=4 SV=1
Ca_10414	2795061-2796575	6	IPR000851; Ribosomal protein S5 IPR005324; Ribosomal protein S5, C-terminal IPR013810; Ribosomal protein S5, N-terminal IPR018192; Ribosomal protein S5, N-terminal, conserved site	GO:0003723; RNA binding; Molecular Function GO:0003735; structural constituent of ribosome; Molecular Function GO:0005622; intracellular; Cellular Component GO:0005840; ribosome; Cellular Component GO:0006412; translation; Biological Process	40S ribosomal protein S2, putative; K02981 small subunit ribosomal protein S2e	RS24_ARATH 40S ribosomal protein S2-4 OS=Arabidopsis thaliana GN=RPS2D PE=2 SV=1	G7LAL7_MEDTR 40S ribosomal protein S2 OS=Medicago truncatula GN=MTR_8g105340 PE=3 SV=1
Ca_10415	2798930-2803139	6	-	-	cleavage and polyadenylation specificity factor, putative; K13148 integrator complex subunit 11 [EC:3.1.27.-]	RIE1_ARATH E3 ubiquitin protein ligase RIE1 OS=Arabidopsis thaliana GN=RIE1 PE=2 SV=1	G7LAL6_MEDTR E3 ubiquitin-protein ligase OS=Medicago truncatula GN=MTR_8g105330 PE=4 SV=1
Ca_10416	2807776-2817272	6	IPR004870; Nucleoporin, Nup155-like IPR007187; Nucleoporin, Nup133/Nup155-like, C-terminal IPR014908; Nucleoporin, Nup133/Nup155-like, N-terminal	GO:0005643; nuclear pore; Cellular Component GO:0006913; nucleocytoplasmic transport; Biological Process GO:0017056; structural constituent of nuclear pore; Molecular Function	hypothetical protein LOC100243944; K14312 nuclear pore complex protein Nup155	NU155_HUMAN Nuclear pore complex protein Nup155 OS=Homo sapiens GN=NUP155 PE=1 SV=1	G7LAL2_MEDTR Nuclear pore complex protein Nup155 OS=Medicago truncatula GN=MTR_8g105290 PE=4 SV=1
Ca_10417	2821666-2828466	6	IPR000357; HEAT IPR021133; HEAT, type 2 IPR021841; Protein of unknown function DUF3434	GO:0005515; protein binding; Molecular Function	hypothetical protein; K10875 DNA repair and recombination protein RAD54 and RAD54-like protein [EC:3.6.4.-]	VAC14_XENLA Protein VAC14 homolog OS=Xenopus laevis GN=vac14 PE=2 SV=1	G7LAL0_MEDTR VAC14-like protein OS=Medicago truncatula GN=MTR_8g105270 PE=4 SV=1
Ca_10420	2846260-2848395	6	IPR002885; Pentatricopeptide repeat	-	Cell division protein ftsH, putative (EC:3.6.4.3); K03798 cell division protease FtsH [EC:3.4.24.-]	PP333_ARATH Pentatricopeptide repeat-containing protein At4g21300 OS=Arabidopsis thaliana GN=PCMP-E36 PE=2 SV=1	G7LAK4_MEDTR Pentatricopeptide repeat-containing protein OS=Medicago truncatula GN=MTR_8g105210 PE=4 SV=1
Ca_10421	2851858-2856348	6	IPR001450; 4Fe-4S binding domain IPR017896; 4Fe-4S ferredoxin, iron-sulpur binding domain IPR017900; 4Fe-4S ferredoxin, iron-sulphur binding, conserved site	GO:0009055; electron carrier activity; Molecular Function GO:0051536; iron-sulfur cluster binding; Molecular Function	NADH-ubiquinone oxidoreductase 1, chain, putative (EC:1.6.99.3); K03941 NADH dehydrogenase (ubiquinone) Fe-S protein 8 [EC:1.6.5.3 1.6.99.3]	NDUS8_SOLTU NADH dehydrogenase [ubiquinone] iron-sulfur protein 8, mitochondrial OS=Solanum tuberosum PE=1 SV=2	G7ZWQ4_MEDTR NADH-quinone oxidoreductase subunit I OS=Medicago truncatula GN=MTR_043s0009 PE=3 SV=1
Ca_10422	2859618-2860190	6	IPR002048; Calcium-binding EF-hand IPR018247; EF-Hand 1, calcium-binding site IPR018248; EF-hand IPR018249; EF-HAND 2	GO:0005509; calcium ion binding; Molecular Function	Polcalcin Jun o, putative (EC:1.3.1.74); K13448 calcium-binding protein CML	CML25_ARATH Probable calcium-binding protein CML25 OS=Arabidopsis thaliana GN=CML25 PE=2 SV=1	G7LAK6_MEDTR Calcium-binding pollen allergen OS=Medicago truncatula GN=MTR_8g105230 PE=4 SV=1
Ca_10423	2862654-2865633	6	IPR001214; SET domain IPR015353; Rubisco LS methyltransferase, substrate-binding domain	GO:0005515; protein binding; Molecular Function	ribulose-1,5 bisphosphate carboxylase oxygenase large subunit N-methyltransferase, putative; K00592 [ribulose-bisphosphate carboxylase]-lysine N-methyltransferase [EC:2.1.1.127]	SETD3_CHICK Histone-lysine N-methyltransferase setd3 OS=Gallus gallus GN=SETD3 PE=2 SV=1	G7LAK3_MEDTR SET domain-containing protein OS=Medicago truncatula GN=MTR_8g105200 PE=4 SV=1
Ca_10424	2867734-2867940	6	-	-	-	-	G7LAK2_MEDTR Putative uncharacterized protein OS=Medicago truncatula GN=MTR_8g105190 PE=4 SV=1
Ca_10425	2876213-2877498	6	IPR000086; NUDIX hydrolase domain IPR020084; NUDIX hydrolase, conserved site	GO:0016787; hydrolase activity; Molecular Function	Hypothetical protein CBG15102; K07766 diphosphoinositol-polyphosphate diphosphatase [EC:3.6.1.52]	NUD18_ARATH Nudix hydrolase 18, mitochondrial OS=Arabidopsis thaliana GN=NUDT18 PE=2 SV=1	G7LAJ8_MEDTR Nudix hydrolase OS=Medicago truncatula GN=MTR_8g105140 PE=3 SV=1
Ca_10426	2881369-2884463	6	IPR007005; XAP5 protein	GO:0005634; nucleus; Cellular Component	Protein FAM50A, putative; K13119 protein FAM50	XCT_ARATH Protein XAP5 CIRCADIAN TIMEKEEPER OS=Arabidopsis thaliana GN=XCT PE=1 SV=1	G7LAJ6_MEDTR Protein XAP5 CIRCADIAN TIMEKEEPER OS=Medicago truncatula GN=MTR_8g105120 PE=4 SV=1
Ca_10427	2886553-2889742	6	IPR000608; Ubiquitin-conjugating enzyme, E2	GO:0016881; acid-amino acid ligase activity; Molecular Function GO:0043687; post-translational protein modification; Biological Process	hypothetical protein; K10704 ubiquitin-conjugating enzyme E2 variant	UEV1B_ARATH Ubiquitin-conjugating enzyme E2 variant 1B OS=Arabidopsis thaliana GN=UEV1B PE=1 SV=1	G7LAI8_MEDTR Ubiquitin-conjugating enzyme E2 variant 1B OS=Medicago truncatula GN=MTR_8g105010 PE=4 SV=1
Ca_10430	2917120-2920344	6	IPR001012; UBX IPR006567; PUG domain IPR018997; PUB domain	GO:0005515; protein binding; Molecular Function	PUX2; PUX2 (PLANT UBX DOMAIN-CONTAINING PROTEIN 2); nucleic acid binding / zinc ion binding; K14011 UBX domain-containing protein 6	UBXN6_HUMAN UBX domain-containing protein 6 OS=Homo sapiens GN=UBXN6 PE=1 SV=1	G7LAI2_MEDTR UBX domain-containing protein OS=Medicago truncatula GN=MTR_8g104930 PE=4 SV=1
Ca_10431	2925246-2928246	6	IPR010399; Tify IPR018467; CO/COL/TOC1, conserved site	GO:0005515; protein binding; Molecular Function	hypothetical protein LOC100262965; K13464 jasmonate ZIM domain-containing protein	TIF6B_ARATH Protein TIFY 6B OS=Arabidopsis thaliana GN=TIFY6B PE=1 SV=1	C6THH1_SOYBN Putative uncharacterized protein OS=Glycine max PE=2 SV=1
Ca_10432	2929361-2931809	6	IPR000490; Glycoside hydrolase, family 17 IPR012946; X8	GO:0004553; hydrolase activity, hydrolyzing O-glycosyl compounds; Molecular Function GO:0005975; carbohydrate metabolic process; Biological Process	hypothetical protein LOC100263145; K14489 arabidopsis histidine kinase 2/3/4 (cytokinin receptor) [EC:2.7.13.3]	E133_ARATH Glucan endo-1,3-beta-glucosidase 3 OS=Arabidopsis thaliana GN=At2g01630 PE=1 SV=2	B9SP53_RICCO Glucan endo-1,3-beta-glucosidase, putative OS=Ricinus communis GN=RCOM_0628390 PE=3 SV=1
Ca_10433	2932686-2933727	6	IPR001810; F-box domain, cyclin-like IPR017900; 4Fe-4S ferredoxin, iron-sulphur binding, conserved site	GO:0005515; protein binding; Molecular Function GO:0009055; electron carrier activity; Molecular Function GO:0051536; iron-sulfur cluster binding; Molecular Function	-	SKI28_ARATH F-box protein SKIP28 OS=Arabidopsis thaliana GN=SKIP28 PE=1 SV=1	G7LAI1_MEDTR F-box protein SKIP28 OS=Medicago truncatula GN=MTR_8g104920 PE=4 SV=1
Ca_10434	2934551-2935100	6	IPR001372; Dynein light chain, type 1/2	GO:0005875; microtubule associated complex; Cellular Component GO:0007017; microtubule-based process; Biological Process	dynein light chain; K10418 dynein light chain LC8-type	DYL1_ANTCR Dynein light chain LC6, flagellar outer arm OS=Anthocidaris crassispina PE=3 SV=1	C6SVJ0_SOYBN Putative uncharacterized protein OS=Glycine max PE=2 SV=1
Ca_10435	2936616-2937485	6	IPR006461; Uncharacterised protein family Cys-rich	-	-	CNR10_MAIZE Cell number regulator 10 OS=Zea mays GN=CNR10 PE=2 SV=1	G7LAH9_MEDTR Putative uncharacterized protein OS=Medicago truncatula GN=MTR_8g104890 PE=4 SV=1
Ca_10436	2942150-2942952	6	IPR006461; Uncharacterised protein family Cys-rich	-	-	PCR2_ARATH Protein PLANT CADMIUM RESISTANCE 2 OS=Arabidopsis thaliana GN=PCR2 PE=1 SV=1	G7K803_MEDTR Putative uncharacterized protein OS=Medicago truncatula GN=MTR_5g017650 PE=4 SV=1
Ca_10437	2951929-2954226	6	IPR012416; Calmodulin binding protein-like	-	hypothetical protein; K02183 calmodulin	-	G7L9S2_MEDTR Putative uncharacterized protein OS=Medicago truncatula GN=MTR_8g104490 PE=4 SV=1
Ca_10438	2959024-2962965	6	IPR000719; Protein kinase, catalytic domain IPR001245; Serine-threonine/tyrosine-protein kinase IPR002290; Serine/threonine-protein kinase domain IPR008271; Serine/threonine-protein kinase, active site IPR017441; Protein kinase, ATP binding site IPR020635; Tyrosine-protein kinase, catalytic domain	GO:0004672; protein kinase activity; Molecular Function GO:0004674; protein serine/threonine kinase activity; Molecular Function GO:0005524; ATP binding; Molecular Function GO:0006468; protein phosphorylation; Biological Process	BAK1; BAK1 (BRI1-ASSOCIATED RECEPTOR KINASE); kinase/ protein binding / protein heterodimerization/ protein serine/threonine kinase; K13416 brassinosteroid insensitive 1-associated receptor kinase 1 [EC:2.7.10.1 2.7.11.1]	Y1670_ARATH Probable receptor-like protein kinase At1g67000 OS=Arabidopsis thaliana GN=At1g67000 PE=2 SV=2	G7L9S6_MEDTR Kinase R-like protein OS=Medicago truncatula GN=MTR_8g104520 PE=3 SV=1
Ca_10439	2968489-2975388	6	IPR005841; Alpha-D-phosphohexomutase IPR005843; Alpha-D-phosphohexomutase, C-terminal IPR005844; Alpha-D-phosphohexomutase, alpha/beta/alpha domain I IPR005845; Alpha-D-phosphohexomutase, alpha/beta/alpha domain II IPR005846; Alpha-D-phosphohexomutase, alpha/beta/alpha domain III IPR016066; Alpha-D-phosphohexomutase, conserved site	GO:0000287; magnesium ion binding; Molecular Function GO:0005975; carbohydrate metabolic process; Biological Process GO:0016868; intramolecular transferase activity, phosphotransferases; Molecular Function	phosphoglucomutase, putative (EC:5.4.2.2); K01835 phosphoglucomutase [EC:5.4.2.2]	PGMC_PEA Phosphoglucomutase, cytoplasmic OS=Pisum sativum GN=PGM1 PE=2 SV=1	G7L9S9_MEDTR Phosphoglucomutase OS=Medicago truncatula GN=MTR_8g104540 PE=3 SV=1
Ca_10440	2981969-2984263	6	IPR000070; Pectinesterase, catalytic IPR006501; Pectinesterase inhibitor IPR018040; Pectinesterase, active site	GO:0004857; enzyme inhibitor activity; Molecular Function GO:0005618; cell wall; Cellular Component GO:0030599; pectinesterase activity; Molecular Function GO:0042545; cell wall modification; Biological Process	Pectinesterase-2 precursor, putative (EC:3.1.1.11); K01051 pectinesterase [EC:3.1.1.11]	PME2_CITSI Pectinesterase 2 OS=Citrus sinensis GN=PECS-2.1 PE=2 SV=1	G7L9T3_MEDTR Pectinesterase OS=Medicago truncatula GN=MTR_8g104580 PE=3 SV=1
Ca_10441	2992284-2999117	6	IPR002312; Aspartyl/Asparaginyl-tRNA synthetase, class IIb IPR004115; GAD domain IPR004364; Aminoacyl-tRNA synthetase, class II (D/K/N) IPR004365; Nucleic acid binding, OB-fold, tRNA/helicase-type IPR004524; Aspartyl-tRNA synthetase, class IIb, bacterial/mitochondrial-type IPR006195; Aminoacyl-tRNA synthetase, class II IPR018150; Aminoacyl-tRNA synthetase, class II (D/K/N)-like	GO:0000166; nucleotide binding; Molecular Function GO:0003676; nucleic acid binding; Molecular Function GO:0004812; aminoacyl-tRNA ligase activity; Molecular Function GO:0004815; aspartate-tRNA ligase activity; Molecular Function GO:0005524; ATP binding; Molecular Function GO:0005737; cytoplasm; Cellular Component GO:0006412; translation; Biological Process GO:0006418; tRNA aminoacylation for pro…	similar to tRNA synthetase class II (D, K and N) family protein; K01876 aspartyl-tRNA synthetase [EC:6.1.1.12]	SYD_TRIEI Aspartate--tRNA ligase OS=Trichodesmium erythraeum (strain IMS101) GN=aspS PE=3 SV=1	G7LAG9_MEDTR Aspartyl-tRNA synthetase OS=Medicago truncatula GN=MTR_8g104740 PE=3 SV=1
Ca_10442	3010495-3010767	6	IPR006501; Pectinesterase inhibitor	GO:0004857; enzyme inhibitor activity; Molecular Function GO:0030599; pectinesterase activity; Molecular Function	-	21KD_DAUCA 21 kDa protein OS=Daucus carota PE=2 SV=1	G7I642_MEDTR Pectinesterase inhibitor OS=Medicago truncatula GN=MTR_1g044870 PE=4 SV=1
Ca_09607	7718851-7723235	6	-	-	-	-	B9H5A4_POPTR Predicted protein OS=Populus trichocarpa GN=POPTRDRAFT_818313 PE=4 SV=1
Ca_09605	7731132-7731704	6	IPR003956; Transcription factor, NFYB/HAP3, conserved site IPR003957; Transcription factor, CBFA/NFYB, DNA topoisomerase IPR003958; Transcription factor CBF/NF-Y/archaeal histone	GO:0003677; DNA binding; Molecular Function GO:0005622; intracellular; Cellular Component GO:0005634; nucleus; Cellular Component GO:0006355; regulation of transcription, DNA-dependent; Biological Process GO:0043565; sequence-specific DNA binding; Molecular Function	hypothetical protein; K08065 nuclear transcription factor Y, beta	NFYB3_ARATH Nuclear transcription factor Y subunit B-3 OS=Arabidopsis thaliana GN=NFYB3 PE=2 SV=1	G7LB97_MEDTR Nuclear transcription factor Y subunit B-3 OS=Medicago truncatula GN=MTR_8g091720 PE=4 SV=1
Ca_09606	7725906-7728192	6	-	-	-	CPR5_ARATH Protein CPR-5 OS=Arabidopsis thaliana GN=CPR5 PE=1 SV=1	G7JA92_MEDTR HYS1 OS=Medicago truncatula GN=MTR_3g094760 PE=4 SV=1
Ca_09597	7805741-7806044	6	-	-	hypothetical protein LOC100252593; K12875 apoptotic chromatin condensation inducer in the nucleus	-	F6H4N5_VITVI Putative uncharacterized protein OS=Vitis vinifera GN=VIT_07s0031g01210 PE=4 SV=1
Ca_09586	7894343-7898451	6	IPR002587; Myo-inositol-1-phosphate synthase IPR013021; Myo-inositol-1-phosphate synthase, GAPDH-like	GO:0004512; inositol-3-phosphate synthase activity; Molecular Function GO:0006021; inositol biosynthetic process; Biological Process GO:0008654; phospholipid biosynthetic process; Biological Process	hypothetical protein LOC100259515; K01858 myo-inositol-1-phosphate synthase [EC:5.5.1.4]	INO1_TOBAC Inositol-3-phosphate synthase OS=Nicotiana tabacum PE=2 SV=1	B6SBM2_CICAR L-myo inositol-1 phosphate synthase 2 OS=Cicer arietinum PE=2 SV=1
Ca_09577	7983136-7985505	6	IPR003337; Trehalose-phosphatase	GO:0003824; catalytic activity; Molecular Function GO:0005992; trehalose biosynthetic process; Biological Process	AGAP008225-PA; K01087 trehalose-phosphatase [EC:3.1.3.12]	OTSB_MYCTU Trehalose-phosphate phosphatase OS=Mycobacterium tuberculosis GN=otsB PE=1 SV=1	B9T4H6_RICCO Trehalose-6-phosphate synthase, putative OS=Ricinus communis GN=RCOM_0198410 PE=4 SV=1
Ca_09563	8080604-8084835	6	IPR002067; Mitochondrial carrier protein IPR018108; Mitochondrial substrate/solute carrier	GO:0005488; binding; Molecular Function GO:0005743; mitochondrial inner membrane; Cellular Component GO:0006810; transport; Biological Process GO:0055085; transmembrane transport; Biological Process	hypothetical protein; K05863 solute carrier family 25 (mitochondrial carrier; adenine nucleotide translocator)	SCMC1_BOVIN Calcium-binding mitochondrial carrier protein SCaMC-1 OS=Bos taurus GN=SLC25A24 PE=2 SV=1	B9SZ46_RICCO Protein brittle-1, chloroplast, putative OS=Ricinus communis GN=RCOM_0213230 PE=3 SV=1
Ca_09564	8075620-8078299	6	IPR001806; Ras GTPase IPR002041; Ran GTPase IPR003577; Ras small GTPase, Ras type IPR003578; Small GTPase, Rho type IPR003579; Ras small GTPase, Rab type IPR013753; Ras IPR020851; Small GTPase	GO:0003924; GTPase activity; Molecular Function GO:0005525; GTP binding; Molecular Function GO:0005622; intracellular; Cellular Component GO:0006886; intracellular protein transport; Biological Process GO:0006913; nucleocytoplasmic transport; Biological Process GO:0007165; signal transduction; Biological Process GO:0007264; small GTPase mediated signal transduction; Biological Process GO:0015031;…	ATRABH1D (ARABIDOPSIS RAB GTPASE HOMOLOG H1D); GTP binding; K07976 Rab family, other	RAH1E_ARATH Ras-related protein RABH1e OS=Arabidopsis thaliana GN=RABH1E PE=2 SV=1	B9H4T8_POPTR Predicted protein OS=Populus trichocarpa GN=POPTRDRAFT_800974 PE=3 SV=1
Ca_09560	8101326-8104268	6	IPR001854; Ribosomal protein L29	GO:0003735; structural constituent of ribosome; Molecular Function GO:0005622; intracellular; Cellular Component GO:0005840; ribosome; Cellular Component GO:0006412; translation; Biological Process	hypothetical protein; K02904 large subunit ribosomal protein L29	RK29_ARATH 50S ribosomal protein L29, chloroplastic OS=Arabidopsis thaliana GN=RPL29 PE=1 SV=1	C6SWH0_SOYBN Putative uncharacterized protein OS=Glycine max PE=2 SV=1
Ca_09562	8087231-8093131	6	IPR000048; IQ motif, EF-hand binding site IPR002110; Ankyrin repeat IPR002909; Cell surface receptor IPT/TIG IPR005559; CG-1 IPR020683; Ankyrin repeat-containing domain	GO:0005515; protein binding; Molecular Function GO:0005516; calmodulin binding; Molecular Function GO:0005634; nucleus; Cellular Component GO:0030528; transcription regulator activity; Molecular Function GO:0045449; regulation of transcription; Biological Process	UNCoordinated family member (unc-44)-like; K10380 ankyrin	CMTA3_ARATH Calmodulin-binding transcription activator 3 OS=Arabidopsis thaliana GN=CMTA3 PE=1 SV=1	F6HWM2_VITVI Putative uncharacterized protein OS=Vitis vinifera GN=VIT_07s0141g00250 PE=4 SV=1
Ca_09561	8094035-8098051	6	IPR001394; Peptidase C19, ubiquitin carboxyl-terminal hydrolase 2 IPR018200; Peptidase C19, ubiquitin carboxyl-terminal hydrolase 2, conserved site	GO:0004221; ubiquitin thiolesterase activity; Molecular Function GO:0006511; ubiquitin-dependent protein catabolic process; Biological Process	Ubiquitin carboxyl-terminal hydrolase, putative (EC:3.1.2.15); K11842 ubiquitin carboxyl-terminal hydrolase 12/46 [EC:3.1.2.15]	UBP4_ARATH Ubiquitin carboxyl-terminal hydrolase 4 OS=Arabidopsis thaliana GN=UBP4 PE=1 SV=2	B9SZ50_RICCO Ubiquitin carboxyl-terminal hydrolase OS=Ricinus communis GN=RCOM_0213470 PE=3 SV=1
Ca_09555	8135053-8142254	6	IPR000695; ATPase, P-type, H+ transporting proton pump IPR001757; ATPase, P-type, K/Mg/Cd/Cu/Zn/Na/Ca/Na/H-transporter IPR004014; ATPase, P-type cation-transporter, N-terminal IPR005834; Haloacid dehalogenase-like hydrolase IPR006068; ATPase, P-type cation-transporter, C-terminal IPR008250; ATPase, P-type, ATPase-associated domain	GO:0003824; catalytic activity; Molecular Function GO:0005524; ATP binding; Molecular Function GO:0006754; ATP biosynthetic process; Biological Process GO:0006812; cation transport; Biological Process GO:0008152; metabolic process; Biological Process GO:0015662; ATPase activity, coupled to transmembrane movement of ions, phosphorylative mechanism; Molecular Function GO:0016020; membrane; Cellular…	hypothetical protein LOC100246545; K01537 Ca2+-transporting ATPase [EC:3.6.3.8]	ACA4_ARATH Calcium-transporting ATPase 4, plasma membrane-type OS=Arabidopsis thaliana GN=ACA4 PE=1 SV=1	Q8W0V0_MEDTR Type IIB calcium ATPase OS=Medicago truncatula GN=MCA3 PE=2 SV=1
Ca_09556	8131609-8134465	6	IPR004853; Domain of unknown function DUF250	-	cell division protein kinase 11B-like; K08818 cell division cycle 2-like [EC:2.7.11.22]	PT310_ARATH Probable sugar phosphate/phosphate translocator At3g10290 OS=Arabidopsis thaliana GN=At3g10290 PE=3 SV=1	A4UTS4_PEA Chloroplast phosphoenolpyruvate/phosphate translocator OS=Pisum sativum PE=2 SV=1
Ca_16686	26450198-26453064	6	IPR001932; Protein phosphatase 2C-like IPR014045; Protein phosphatase 2C, N-terminal IPR015655; Protein phosphatase 2C	GO:0003824; catalytic activity; Molecular Function	similar to predicted protein; K01102 pyruvate dehydrogenase phosphatase [EC:3.1.3.43]	P2C04_ARATH Probable protein phosphatase 2C 4 OS=Arabidopsis thaliana GN=PLL5 PE=1 SV=1	F6GV16_VITVI Putative uncharacterized protein OS=Vitis vinifera GN=VIT_06s0004g04600 PE=4 SV=1
Ca_09610	7701449-7705502	6	-	-	-	-	D7SW56_VITVI Putative uncharacterized protein OS=Vitis vinifera GN=VIT_07s0031g01560 PE=4 SV=1
Ca_09609	7706290-7707016	6	-	-	-	-	D7SW53_VITVI Putative uncharacterized protein OS=Vitis vinifera GN=VIT_07s0031g01530 PE=4 SV=1
Ca_09608	7714849-7716197	6	-	-	-	-	C6TKC7_SOYBN Putative uncharacterized protein OS=Glycine max PE=2 SV=1
Ca_09604	7740751-7749012	6	IPR004147; ABC-1	-	Os09g0250700; K08869 aarF domain-containing kinase	Y1770_SYNY3 Uncharacterized protein sll1770 OS=Synechocystis sp. (strain PCC 6803 / Kazusa) GN=sll1770 PE=3 SV=1	G7LB96_MEDTR ABC transporter-like protein OS=Medicago truncatula GN=MTR_8g091710 PE=4 SV=1
Ca_09603	7751794-7753442	6	IPR001128; Cytochrome P450 IPR002401; Cytochrome P450, E-class, group I IPR017972; Cytochrome P450, conserved site	GO:0004497; monooxygenase activity; Molecular Function GO:0005506; iron ion binding; Molecular Function GO:0009055; electron carrier activity; Molecular Function GO:0020037; heme binding; Molecular Function GO:0055114; oxidation-reduction process; Biological Process	flavonoid 3-hydroxylase, putative (EC:1.14.13.88); K09755 ferulate-5-hydroxylase [EC:1.14.-.-]	F3PH_ARATH Flavonoid 3'-monooxygenase OS=Arabidopsis thaliana GN=CYP75B1 PE=1 SV=1	G7LB94_MEDTR Cytochrome P450 OS=Medicago truncatula GN=MTR_8g091690 PE=3 SV=1
Ca_09602	7758213-7760163	6	IPR002885; Pentatricopeptide repeat	-	-	PP358_ARATH Pentatricopeptide repeat-containing protein At4g39620, chloroplastic OS=Arabidopsis thaliana GN=EMB2453 PE=2 SV=1	G7LB92_MEDTR Pentatricopeptide repeat-containing protein OS=Medicago truncatula GN=MTR_8g091670 PE=4 SV=1
Ca_09601	7764960-7767957	6	IPR005814; Aminotransferase class-III	GO:0008483; transaminase activity; Molecular Function GO:0030170; pyridoxal phosphate binding; Molecular Function	hypothetical protein LOC100243935; K00827 alanine-glyoxylate transaminase / (R)-3-amino-2-methylpropionate-pyruvate transaminase [EC:2.6.1.44 2.6.1.40]	AGT21_ARATH Alanine--glyoxylate aminotransferase 2 homolog 1, mitochondrial OS=Arabidopsis thaliana GN=AGT2 PE=1 SV=1	B7FLF5_MEDTR Alanine-glyoxylate aminotransferase-like protein OS=Medicago truncatula GN=MTR_8g091660 PE=2 SV=1
Ca_09600	7768658-7771020	6	IPR004827; Basic-leucine zipper (bZIP) transcription factor IPR011616; bZIP transcription factor, bZIP-1	GO:0003700; sequence-specific DNA binding transcription factor activity; Molecular Function GO:0006355; regulation of transcription, DNA-dependent; Biological Process GO:0043565; sequence-specific DNA binding; Molecular Function GO:0046983; protein dimerization activity; Molecular Function	hypothetical protein LOC100249156; K14431 transcription factor TGA	TGA4_ARATH Transcription factor TGA4 OS=Arabidopsis thaliana GN=TGA4 PE=1 SV=2	G7LB89_MEDTR Transcription factor TGA OS=Medicago truncatula GN=MTR_8g091650 PE=4 SV=1
Ca_09599	7783493-7787083	6	-	-	-	-	G7LB84_MEDTR Putative uncharacterized protein OS=Medicago truncatula GN=MTR_8g091600 PE=4 SV=1
Ca_09598	7792847-7793062	6	-	-	-	-	G7LAG4_MEDTR Putative uncharacterized protein OS=Medicago truncatula GN=MTR_8g091590 PE=4 SV=1
Ca_09596	7819986-7825167	6	IPR019133; Mitochondrial inner membrane protein Mitofilin	GO:0031305; integral to mitochondrial inner membrane; Cellular Component	-	-	G7LAF4_MEDTR Putative uncharacterized protein OS=Medicago truncatula GN=MTR_8g091480 PE=4 SV=1
Ca_09595	7827394-7838286	6	IPR000008; C2 calcium-dependent membrane targeting IPR000225; Armadillo IPR018029; C2 membrane targeting protein	GO:0005515; protein binding; Molecular Function	hypothetical protein; K08332 vacuolar protein 8	PUB4_ARATH U-box domain-containing protein 4 OS=Arabidopsis thaliana GN=PUB4 PE=1 SV=3	G7LAF3_MEDTR U-box domain-containing protein OS=Medicago truncatula GN=MTR_8g091470 PE=4 SV=1
Ca_09594	7845820-7846380	6	IPR006121; Heavy metal transport/detoxification protein	GO:0030001; metal ion transport; Biological Process GO:0046872; metal ion binding; Molecular Function	-	-	G7LAE8_MEDTR Putative uncharacterized protein OS=Medicago truncatula GN=MTR_8g091420 PE=4 SV=1
Ca_09593	7848874-7850327	6	IPR001179; Peptidyl-prolyl cis-trans isomerase, FKBP-type, domain IPR023566; Peptidyl-prolyl cis-trans isomerase, FKBP-type	GO:0006457; protein folding; Biological Process	Os06g0663800; K01802 peptidylprolyl isomerase [EC:5.2.1.8]	FK162_ARATH Peptidyl-prolyl cis-trans isomerase FKBP16-2, chloroplastic OS=Arabidopsis thaliana GN=FKBP16-2 PE=1 SV=1	G7LAE7_MEDTR Peptidyl-prolyl cis-trans isomerase OS=Medicago truncatula GN=MTR_8g091410 PE=4 SV=1
Ca_09592	7850679-7852031	6	IPR000782; FAS1 domain	-	-	-	G7LCA0_MEDTR Fasciclin-like arabinogalactan protein OS=Medicago truncatula GN=MTR_8g092370 PE=4 SV=1
Ca_09591	7853206-7856084	6	IPR001117; Multicopper oxidase, type 1 IPR002355; Multicopper oxidase, copper-binding site IPR011706; Multicopper oxidase, type 2 IPR011707; Multicopper oxidase, type 3	GO:0005507; copper ion binding; Molecular Function GO:0016491; oxidoreductase activity; Molecular Function GO:0055114; oxidation-reduction process; Biological Process	hypothetical protein LOC100251280; K00423 L-ascorbate oxidase [EC:1.10.3.3]	ASO_CUCMA L-ascorbate oxidase OS=Cucurbita maxima GN=AAO PE=1 SV=2	G7LAE5_MEDTR L-ascorbate oxidase OS=Medicago truncatula GN=MTR_8g091390 PE=4 SV=1
Ca_09590	7872200-7875829	6	IPR001176; 1-aminocyclopropane-1-carboxylate synthase IPR004838; Aminotransferases, class-I, pyridoxal-phosphate-binding site IPR004839; Aminotransferase, class I/classII	GO:0003824; catalytic activity; Molecular Function GO:0009058; biosynthetic process; Biological Process GO:0016769; transferase activity, transferring nitrogenous groups; Molecular Function GO:0016847; 1-aminocyclopropane-1-carboxylate synthase activity; Molecular Function GO:0030170; pyridoxal phosphate binding; Molecular Function	hypothetical protein ; K12586 exosome complex component RRP43	PAT_ARATH Bifunctional aspartate aminotransferase and glutamate/aspartate-prephenate aminotransferase OS=Arabidopsis thaliana GN=PAT PE=1 SV=2	G7LAD1_MEDTR Aspartate aminotransferase OS=Medicago truncatula GN=MTR_8g091280 PE=3 SV=1
Ca_09589	7876494-7878148	6	IPR006055; Exonuclease IPR013520; Exonuclease, RNase T/DNA polymerase III	GO:0004527; exonuclease activity; Molecular Function GO:0005622; intracellular; Cellular Component	-	DPO3_THETN DNA polymerase III polC-type OS=Thermoanaerobacter tengcongensis (strain DSM 15242 / JCM 11007 / NBRC 100824 / MB4) GN=polC PE=3 SV=1	G7LAD2_MEDTR DNA polymerase III polC-type OS=Medicago truncatula GN=MTR_8g091290 PE=4 SV=1
Ca_09588	7878698-7880262	6	IPR010369; Protein of unknown function DUF966	-	-	-	G7LAD3_MEDTR Putative uncharacterized protein OS=Medicago truncatula GN=MTR_8g091300 PE=4 SV=1
Ca_09587	7884591-7887850	6	IPR001547; Glycoside hydrolase, family 5	GO:0004553; hydrolase activity, hydrolyzing O-glycosyl compounds; Molecular Function GO:0005975; carbohydrate metabolic process; Biological Process	hypothetical protein; K01210 glucan 1,3-beta-glucosidase [EC:3.2.1.58]	EXGA_EMENI Probable glucan 1,3-beta-glucosidase A OS=Emericella nidulans (strain FGSC A4 / ATCC 38163 / CBS 112.46 / NRRL 194 / M139) GN=exgA PE=3 SV=2	D3YBD8_TRIRP Putative uncharacterized protein OS=Trifolium repens PE=4 SV=1
Ca_09585	7905827-7908534	6	IPR001345; Phosphoglycerate/bisphosphoglycerate mutase, active site IPR005952; Phosphoglycerate mutase 1 IPR013078; Histidine phosphatase superfamily, clade-1	GO:0003824; catalytic activity; Molecular Function GO:0006096; glycolysis; Biological Process GO:0008152; metabolic process; Biological Process GO:0016868; intramolecular transferase activity, phosphotransferases; Molecular Function	phosphoglycerate mutase, putative (EC:5.4.2.1); K01834 phosphoglycerate mutase [EC:5.4.2.1]	GPMA_PARUW 2,3-bisphosphoglycerate-dependent phosphoglycerate mutase OS=Protochlamydia amoebophila (strain UWE25) GN=gpmA PE=3 SV=1	G7LAD7_MEDTR Phosphoglycerate mutase OS=Medicago truncatula GN=MTR_8g091330 PE=4 SV=1
Ca_09584	7911970-7916290	6	IPR000300; Inositol polyphosphate-related phosphatase IPR005135; Endonuclease/exonuclease/phosphatase	GO:0004437; inositol or phosphatidylinositol phosphatase activity; Molecular Function	inositol 5-phosphatase (ISS); K01099 phosphatidylinositol-bisphosphatase [EC:3.1.3.36]	IP5P3_ARATH Type I inositol-1,4,5-trisphosphate 5-phosphatase CVP2 OS=Arabidopsis thaliana GN=CVP2 PE=1 SV=2	G7LAE1_MEDTR Type I inositol-1,4,5-trisphosphate 5-phosphatase OS=Medicago truncatula GN=MTR_8g091360 PE=4 SV=1
Ca_09583	7916758-7918140	6	IPR006957; Ethylene insensitive 3	GO:0005634; nucleus; Cellular Component GO:0030528; transcription regulator activity; Molecular Function	ETHYLENE-INSENSITIVE3 protein, putative; K14514 ethylene-insensitive protein 3	EIL4_ARATH Putative ETHYLENE INSENSITIVE 3-like 4 protein OS=Arabidopsis thaliana GN=EIL4 PE=2 SV=1	D3YBE3_TRIRP Ethylene insensitive-like protein OS=Trifolium repens PE=4 SV=1
Ca_09582	7923785-7926731	6	IPR006867; Domain of unknown function DUF632 IPR006868; Domain of unknown function DUF630	-	-	-	G7LAC7_MEDTR BZIP transcription factor bZIP133 OS=Medicago truncatula GN=MTR_8g091250 PE=4 SV=1
Ca_09581	7928269-7931903	6	IPR002655; Acyl-CoA oxidase, C-terminal IPR006090; Acyl-CoA oxidase/dehydrogenase, type 1 IPR006091; Acyl-CoA oxidase/dehydrogenase, central domain	GO:0003995; acyl-CoA dehydrogenase activity; Molecular Function GO:0003997; acyl-CoA oxidase activity; Molecular Function GO:0005777; peroxisome; Cellular Component GO:0006635; fatty acid beta-oxidation; Biological Process GO:0016627; oxidoreductase activity, acting on the CH-CH group of donors; Molecular Function GO:0055114; oxidation-reduction process; Biological Process	hypothetical protein LOC100255430; K00232 acyl-CoA oxidase [EC:1.3.3.6]	ACOX2_ARATH Acyl-coenzyme A oxidase 2, peroxisomal OS=Arabidopsis thaliana GN=ACX2 PE=1 SV=2	D3YBG7_TRIRP Acyl-coenzyme A oxidase OS=Trifolium repens PE=3 SV=1
Ca_09580	7938894-7940486	6	-	-	-	-	D3YBG8_TRIRP Putative uncharacterized protein OS=Trifolium repens PE=4 SV=1
Ca_09579	7945033-7946046	6	IPR001931; Ribosomal protein S21e IPR018279; Ribosomal protein S21e, conserved site	GO:0003735; structural constituent of ribosome; Molecular Function GO:0005622; intracellular; Cellular Component GO:0005840; ribosome; Cellular Component GO:0006412; translation; Biological Process	structural constituent of ribosome; K02971 small subunit ribosomal protein S21e	RS212_ARATH 40S ribosomal protein S21-2 OS=Arabidopsis thaliana GN=RPS21C PE=3 SV=2	B7FGU9_MEDTR 40S ribosomal protein S21 OS=Medicago truncatula PE=3 SV=1
Ca_09578	7956943-7957551	6	IPR001471; Pathogenesis-related transcriptional factor/ERF, DNA-binding	GO:0003700; sequence-specific DNA binding transcription factor activity; Molecular Function GO:0006355; regulation of transcription, DNA-dependent; Biological Process	hypothetical protein LOC100245515; K09286 EREBP-like factor	ERF60_ARATH Ethylene-responsive transcription factor ERF060 OS=Arabidopsis thaliana GN=ERF060 PE=2 SV=1	D3YBG9_TRIRP Dehydration responsive element binding protein OS=Trifolium repens PE=4 SV=1
Ca_09570	8035947-8038430	6	-	-	-	-	G7J3S2_MEDTR Putative uncharacterized protein OS=Medicago truncatula GN=MTR_3g087250 PE=4 SV=1
Ca_09569	8041460-8043678	6	IPR001464; Annexin IPR009118; Annexin, plant IPR018252; Annexin repeat, conserved site IPR018502; Annexin repeat	GO:0005509; calcium ion binding; Molecular Function GO:0005544; calcium-dependent phospholipid binding; Molecular Function	-	ANXD7_ARATH Annexin D7 OS=Arabidopsis thaliana GN=ANNAT7 PE=2 SV=1	Q42922_MEDSA Annexin (Fragment) OS=Medicago sativa GN=ann PE=2 SV=1
Ca_09568	8050243-8053706	6	IPR006571; TLDc	-	hypothetical protein; K12587 exosome complex component MTR3, animal type	CT118_HUMAN Uncharacterized protein C20orf118 OS=Homo sapiens GN=C20orf118 PE=2 SV=1	B9SZ36_RICCO Putative uncharacterized protein OS=Ricinus communis GN=RCOM_0212730 PE=4 SV=1
Ca_09567	8056607-8061400	6	IPR007271; Nucleotide-sugar transporter	GO:0000139; Golgi membrane; Cellular Component GO:0005351; sugar:hydrogen symporter activity; Molecular Function GO:0008643; carbohydrate transport; Biological Process GO:0016021; integral to membrane; Cellular Component	-	CSTR5_ARATH CMP-sialic acid transporter 5 OS=Arabidopsis thaliana GN=At5g65000 PE=2 SV=1	B9HFG5_POPTR Predicted protein OS=Populus trichocarpa GN=POPTRDRAFT_832268 PE=4 SV=1
Ca_09566	8066780-8067115	6	IPR013025; Ribosomal protein L25/L23	GO:0003735; structural constituent of ribosome; Molecular Function GO:0005622; intracellular; Cellular Component GO:0005840; ribosome; Cellular Component GO:0006412; translation; Biological Process	-	RL23_HAES1 50S ribosomal protein L23 OS=Haemophilus somnus (strain 129Pt) GN=rplW PE=3 SV=1	D7T5V5_VITVI Putative uncharacterized protein OS=Vitis vinifera GN=VIT_00s0742g00020 PE=4 SV=1
Ca_09565	8068108-8071530	6	IPR000210; BTB/POZ-like IPR004249; NPH3	GO:0004871; signal transducer activity; Molecular Function GO:0005515; protein binding; Molecular Function GO:0009416; response to light stimulus; Biological Process	-	DOT3_ARATH Putative BTB/POZ domain-containing protein DOT3 OS=Arabidopsis thaliana GN=DOT3 PE=3 SV=1	B9SZ41_RICCO Root phototropism protein, putative OS=Ricinus communis GN=RCOM_0212780 PE=4 SV=1
Ca_06787	5708526-5712934	7	IPR000269; Copper amine oxidase IPR015798; Copper amine oxidase, C-terminal IPR015800; Copper amine oxidase, N2-terminal IPR015802; Copper amine oxidase, N3-terminal	GO:0005507; copper ion binding; Molecular Function GO:0008131; primary amine oxidase activity; Molecular Function GO:0009308; amine metabolic process; Biological Process GO:0048038; quinone binding; Molecular Function GO:0055114; oxidation-reduction process; Biological Process	copper-containing amine oxidase; K00276 primary-amine oxidase [EC:1.4.3.21]	AMO_PEA Primary amine oxidase OS=Pisum sativum PE=1 SV=1	O65749_CICAR Amine oxidase (Precursor) OS=Cicer arietinum PE=2 SV=2
Ca_06786	5713366-5714268	7	IPR008390; AWPM-19-like	-	-	-	Q8LG79_ARATH AWPM-19-like protein OS=Arabidopsis thaliana GN=At5g18970 PE=2 SV=1
Ca_06770	5881213-5883786	7	IPR000340; Dual specificity phosphatase, catalytic domain IPR000387; Protein-tyrosine/Dual-specificity phosphatase IPR020422; Dual specificity phosphatase, subgroup, catalytic domain	GO:0006470; protein dephosphorylation; Biological Process GO:0008138; protein tyrosine/serine/threonine phosphatase activity; Molecular Function GO:0016311; dephosphorylation; Biological Process GO:0016791; phosphatase activity; Molecular Function	Dual specificity protein phosphatase, putative (EC:3.1.3.16); K14165 dual specificity phosphatase [EC:3.1.3.16 3.1.3.48]	DUS1_ARATH Dual specificity protein phosphatase 1 OS=Arabidopsis thaliana GN=DSPTP1 PE=1 SV=1	C6SYZ7_SOYBN Putative uncharacterized protein OS=Glycine max PE=2 SV=1
Ca_06755	6035253-6041627	7	IPR000467; D111/G-patch IPR001374; Single-stranded nucleic acid binding R3H	GO:0003676; nucleic acid binding; Molecular Function GO:0005622; intracellular; Cellular Component	hypothetical protein; K13103 tuftelin-interacting protein 11	ZGPAT_DROAN Zinc finger CCCH-type with G patch domain-containing protein OS=Drosophila ananassae GN=GF15731 PE=3 SV=1	G7JHT7_MEDTR Zinc finger CCCH-type with G patch domain-containing protein OS=Medicago truncatula GN=MTR_4g116570 PE=4 SV=1
Ca_06751	6079807-6080217	7	-	-	-	-	G7JHT0_MEDTR Putative uncharacterized protein OS=Medicago truncatula GN=MTR_4g116500 PE=4 SV=1
Ca_23314	30929035-30929319	7	-	-	-	-	-
Ca_10070	31938618-31941025	7	IPR000271; Ribosomal protein L34 IPR020939; Ribosomal protein L34, conserved site	GO:0003735; structural constituent of ribosome; Molecular Function GO:0005622; intracellular; Cellular Component GO:0005840; ribosome; Cellular Component GO:0006412; translation; Biological Process	-	RL34_MARMS 50S ribosomal protein L34 OS=Marinomonas sp. (strain MWYL1) GN=rpmH PE=3 SV=1	Q6ZZ86_CICAR Ribosomal protein L34 OS=Cicer arietinum GN=Lin1 PE=2 SV=1
Ca_10069	31946645-31948223	7	IPR001005; SANT domain, DNA binding IPR014778; Myb, DNA-binding IPR015495; Myb transcription factor IPR017930; Transcription regulator HTH, Myb-type, DNA-binding	GO:0003677; DNA binding; Molecular Function	MYB108; hypothetical protein; K09422 myb proto-oncogene protein, plant	MYB86_ARATH Transcription factor MYB86 OS=Arabidopsis thaliana GN=MYB86 PE=2 SV=1	G7IS44_MEDTR R2R3-MYB transcription factor OS=Medicago truncatula GN=MTR_2g099740 PE=4 SV=1
Ca_16158	33331433-33336057	7	IPR000504; RNA recognition motif domain IPR003954; RNA recognition motif domain, eukaryote	GO:0003676; nucleic acid binding; Molecular Function	tial1, MGC66130, zgc:66130; TIA1 cytotoxic granule-associated RNA binding protein-like 1; K13201 nucleolysin TIAR	TIAR_HUMAN Nucleolysin TIAR OS=Homo sapiens GN=TIAL1 PE=1 SV=1	B7FLK8_MEDTR Putative uncharacterized protein OS=Medicago truncatula PE=2 SV=1
Ca_16159	33338713-33341373	7	IPR013026; Tetratricopeptide repeat-containing	GO:0005515; protein binding; Molecular Function	-	FLU_ARATH Protein FLUORESCENT IN BLUE LIGHT, chloroplastic OS=Arabidopsis thaliana GN=FLU PE=1 SV=1	G7L8A8_MEDTR Tetratricopeptide repeat protein OS=Medicago truncatula GN=MTR_8g022040 PE=4 SV=1
Ca_16160	33344021-33344485	7	-	-	-	-	C6T5J1_SOYBN Putative uncharacterized protein OS=Glycine max PE=2 SV=1
Ca_16167	33453279-33461157	7	IPR001140; ABC transporter, transmembrane domain IPR003439; ABC transporter-like IPR003593; ATPase, AAA+ type, core IPR017871; ABC transporter, conserved site IPR017940; ABC transporter, integral membrane type 1	GO:0000166; nucleotide binding; Molecular Function GO:0005524; ATP binding; Molecular Function GO:0006810; transport; Biological Process GO:0016021; integral to membrane; Cellular Component GO:0016887; ATPase activity; Molecular Function GO:0017111; nucleoside-triphosphatase activity; Molecular Function GO:0042626; ATPase activity, coupled to transmembrane movement of substances; Molecular Functi…	ppabcb16; ATP-binding cassette transporter, subfamily B, member 16, group MDR/PGP protein PpABCB16; K05658 ATP-binding cassette, subfamily B (MDR/TAP), member 1	AB19B_ARATH ABC transporter B family member 19 OS=Arabidopsis thaliana GN=ABCB19 PE=1 SV=1	G7L8C5_MEDTR ABC transporter B family member OS=Medicago truncatula GN=MTR_8g022270 PE=3 SV=1
Ca_19470	46715391-46721433	7	IPR000225; Armadillo IPR007205; Uncharacterised protein family UPF0507 IPR007206; Uncharacterised protein family UPF0507, C-terminal	GO:0005515; protein binding; Molecular Function	-	F203A_MOUSE Protein FAM203A OS=Mus musculus GN=Fam203a PE=2 SV=1	G7LA57_MEDTR Putative uncharacterized protein OS=Medicago truncatula GN=MTR_8g055880 PE=4 SV=1
Ca_06785	5719739-5728762	7	IPR000073; Alpha/beta hydrolase fold-1	-	Protein C20orf22; K13704 abhydrolase domain-containing protein 12 [EC:3.1.1.23]	YQKD_BACSU Uncharacterized protein yqkD OS=Bacillus subtilis GN=yqkD PE=4 SV=1	B7FLD8_MEDTR Putative uncharacterized protein (Fragment) OS=Medicago truncatula PE=2 SV=1
Ca_06784	5729773-5732691	7	-	-	-	-	G7IKE1_MEDTR Putative uncharacterized protein OS=Medicago truncatula GN=MTR_2g021310 PE=4 SV=1
Ca_06783	5735239-5738738	7	IPR000719; Protein kinase, catalytic domain IPR002290; Serine/threonine-protein kinase domain IPR003527; MAP kinase, conserved site IPR017441; Protein kinase, ATP binding site IPR017442; Serine/threonine-protein kinase-like domain IPR020635; Tyrosine-protein kinase, catalytic domain	GO:0004672; protein kinase activity; Molecular Function GO:0004674; protein serine/threonine kinase activity; Molecular Function GO:0004707; MAP kinase activity; Molecular Function GO:0005524; ATP binding; Molecular Function GO:0006468; protein phosphorylation; Biological Process	ATMPK17; MAP kinase; K00924 [EC:2.7.1.-]	MPK16_ARATH Mitogen-activated protein kinase 16 OS=Arabidopsis thaliana GN=MPK16 PE=2 SV=2	B9RSS7_RICCO Big map kinase/bmk, putative OS=Ricinus communis GN=RCOM_0678200 PE=4 SV=1
Ca_06782	5764877-5766431	7	IPR002925; Dienelactone hydrolase	GO:0016787; hydrolase activity; Molecular Function	Cmbl, 2310016A09Rik; carboxymethylenebutenolidase-like (Pseudomonas); K01061 carboxymethylenebutenolidase [EC:3.1.1.45]	E134_MAIZE Endo-1,3;1,4-beta-D-glucanase OS=Zea mays PE=1 SV=1	B7FJV2_MEDTR Putative uncharacterized protein OS=Medicago truncatula PE=2 SV=1
Ca_06781	5772931-5775733	7	IPR002925; Dienelactone hydrolase	GO:0016787; hydrolase activity; Molecular Function	Cmbl, 2310016A09Rik; carboxymethylenebutenolidase-like (Pseudomonas); K01061 carboxymethylenebutenolidase [EC:3.1.1.45]	E134_MAIZE Endo-1,3;1,4-beta-D-glucanase OS=Zea mays PE=1 SV=1	B7FJV2_MEDTR Putative uncharacterized protein OS=Medicago truncatula PE=2 SV=1
Ca_06780	5778775-5782644	7	IPR000358; Ribonucleotide reductase	GO:0004748; ribonucleoside-diphosphate reductase activity; Molecular Function GO:0009186; deoxyribonucleoside diphosphate metabolic process; Biological Process GO:0055114; oxidation-reduction process; Biological Process	hypothetical protein LOC100263189; K10808 ribonucleoside-diphosphate reductase subunit M2 [EC:1.17.4.1]	RIR2A_ARATH Ribonucleoside-diphosphate reductase small chain A OS=Arabidopsis thaliana GN=RNR2A PE=1 SV=2	Q9XE60_SOYBN Ribonucleotide reductase small subunit OS=Glycine max PE=2 SV=1
Ca_06779	5792491-5797439	7	IPR000644; Cystathionine beta-synthase, core IPR002550; Domain of unknown function DUF21	GO:0005515; protein binding; Molecular Function	-	Y4424_ARATH DUF21 domain-containing protein At4g14240 OS=Arabidopsis thaliana GN=CBSDUF1 PE=2 SV=1	B9HMC7_POPTR Predicted protein OS=Populus trichocarpa GN=POPTRDRAFT_1085756 PE=4 SV=1
Ca_06778	5801026-5802695	7	IPR000504; RNA recognition motif domain	GO:0003676; nucleic acid binding; Molecular Function	similar to poly(A) binding protein; K13126 polyadenylate-binding protein	GRP2_ARATH Glycine-rich RNA-binding protein 2, mitochondrial OS=Arabidopsis thaliana GN=GRP2 PE=1 SV=1	D7T6Q8_VITVI Putative uncharacterized protein OS=Vitis vinifera GN=VIT_05s0020g02620 PE=4 SV=1
Ca_06777	5811457-5812194	7	IPR002627; tRNA isopentenyltransferase	GO:0005524; ATP binding; Molecular Function GO:0008033; tRNA processing; Biological Process	cytokinin biosynthetic isopentenyltransferase; K10760 adenylate isopentenyltransferase (cytokinin synthase)	IPT5_ARATH Adenylate isopentenyltransferase 5, chloroplastic OS=Arabidopsis thaliana GN=IPT5 PE=1 SV=2	Q2MHM8_PEA Adenylate isopentenyltransferase OS=Pisum sativum GN=PsIPT1 PE=2 SV=1
Ca_06776	5830430-5836181	7	IPR013744; Protein of unknown function DUF1749	-	-	YKM6_SCHPO UPF0613 protein PB24D3.06c OS=Schizosaccharomyces pombe (strain 972 / ATCC 24843) GN=SPAPB24D3.06c PE=2 SV=1	C6TIZ7_SOYBN Putative uncharacterized protein OS=Glycine max PE=2 SV=1
Ca_06775	5839651-5841556	7	-	-	-	-	B9RTT4_RICCO Putative uncharacterized protein OS=Ricinus communis GN=RCOM_0912600 PE=4 SV=1
Ca_06774	5844697-5848413	7	IPR015414; SNARE associated Golgi protein	-	-	Y305_SYNY3 TVP38/TMEM64 family membrane protein slr0305 OS=Synechocystis sp. (strain PCC 6803 / Kazusa) GN=slr0305 PE=3 SV=1	B9HY66_POPTR Predicted protein OS=Populus trichocarpa GN=POPTRDRAFT_725740 PE=4 SV=1
Ca_06773	5849853-5850311	7	-	-	-	-	C6T3Q2_SOYBN Putative uncharacterized protein OS=Glycine max PE=2 SV=1
Ca_06772	5852507-5854793	7	IPR001748; G10 protein IPR018230; BUD31/G10-related, conserved site	GO:0005634; nucleus; Cellular Component	Protein G10, putative; K12873 bud site selection protein 31	BD31B_ORYSJ Protein BUD31 homolog 2 OS=Oryza sativa subsp. japonica GN=Os05g0446300 PE=2 SV=1	C6SVT6_SOYBN Putative uncharacterized protein OS=Glycine max PE=2 SV=1
Ca_06771	5865279-5867023	7	IPR006121; Heavy metal transport/detoxification protein	GO:0030001; metal ion transport; Biological Process GO:0046872; metal ion binding; Molecular Function	-	-	G8A049_MEDTR Dual-specificity protein phosphatase-like protein (Fragment) OS=Medicago truncatula GN=MTR_099s0001 PE=4 SV=1
Ca_06769	5887683-5889029	7	IPR001461; Peptidase A1	GO:0004190; aspartic-type endopeptidase activity; Molecular Function GO:0006508; proteolysis; Biological Process	-	7SB1_SOYBN Basic 7S globulin OS=Glycine max GN=BG PE=1 SV=2	G8A053_MEDTR Basic 7S globulin OS=Medicago truncatula GN=MTR_099s0004 PE=4 SV=1
Ca_06768	5905262-5908197	7	-	-	hypothetical protein; K01953 asparagine synthase (glutamine-hydrolysing) [EC:6.3.5.4]	TSJT1_TOBAC Stem-specific protein TSJT1 OS=Nicotiana tabacum GN=TSJT1 PE=2 SV=1	Q6UK15_GOSHI Al-induced protein OS=Gossypium hirsutum PE=2 SV=1
Ca_06767	5910676-5914624	7	IPR000719; Protein kinase, catalytic domain IPR001223; Glycoside hydrolase, family 18, catalytic domain IPR002290; Serine/threonine-protein kinase domain IPR008271; Serine/threonine-protein kinase, active site IPR011583; Chitinase II IPR017441; Protein kinase, ATP binding site IPR017442; Serine/threonine-protein kinase-like domain IPR020635; Tyrosine-protein kinase, catalytic domain	GO:0004553; hydrolase activity, hydrolyzing O-glycosyl compounds; Molecular Function GO:0004568; chitinase activity; Molecular Function GO:0004672; protein kinase activity; Molecular Function GO:0004674; protein serine/threonine kinase activity; Molecular Function GO:0005524; ATP binding; Molecular Function GO:0005975; carbohydrate metabolic process; Biological Process GO:0006032; chitin cataboli…	hypothetical protein; K01183 chitinase [EC:3.2.1.14]	CE101_ARATH G-type lectin S-receptor-like serine/threonine-protein kinase CES101 OS=Arabidopsis thaliana GN=CES101 PE=2 SV=2	F6HWU5_VITVI Putative uncharacterized protein OS=Vitis vinifera GN=VIT_00s0540g00020 PE=4 SV=1
Ca_06766	5916372-5917625	7	IPR001223; Glycoside hydrolase, family 18, catalytic domain IPR001579; Glycoside hydrolase, chitinase active site IPR011583; Chitinase II	GO:0004553; hydrolase activity, hydrolyzing O-glycosyl compounds; Molecular Function GO:0004568; chitinase activity; Molecular Function GO:0005975; carbohydrate metabolic process; Biological Process GO:0006032; chitin catabolic process; Biological Process	hypothetical protein LOC100248333; K01183 chitinase [EC:3.2.1.14]	CHIT1_HUMAN Chitotriosidase-1 OS=Homo sapiens GN=CHIT1 PE=1 SV=1	Q84N00_MEDTR Putative class 5 chitinase OS=Medicago truncatula GN=chit5 PE=3 SV=1
Ca_06765	5921885-5925291	7	IPR005176; Domain of unknown function DUF298 IPR014764; Defective-in-cullin neddylation protein	-	-	DCNL5_BOVIN DCN1-like protein 5 OS=Bos taurus GN=DCUN1D5 PE=2 SV=1	B7FLH3_MEDTR Putative uncharacterized protein OS=Medicago truncatula PE=2 SV=1
Ca_06764	5928489-5933500	7	IPR000695; ATPase, P-type, H+ transporting proton pump IPR001757; ATPase, P-type, K/Mg/Cd/Cu/Zn/Na/Ca/Na/H-transporter IPR004014; ATPase, P-type cation-transporter, N-terminal IPR005834; Haloacid dehalogenase-like hydrolase IPR008250; ATPase, P-type, ATPase-associated domain IPR018303; ATPase, P-type phosphorylation site	GO:0003824; catalytic activity; Molecular Function GO:0005524; ATP binding; Molecular Function GO:0006754; ATP biosynthetic process; Biological Process GO:0006812; cation transport; Biological Process GO:0008152; metabolic process; Biological Process GO:0015662; ATPase activity, coupled to transmembrane movement of ions, phosphorylative mechanism; Molecular Function GO:0016020; membrane; Cellular…	autoinhibited H+ ATPase; K01535 H+-transporting ATPase [EC:3.6.3.6]	PMA8_ARATH ATPase 8, plasma membrane-type OS=Arabidopsis thaliana GN=AHA8 PE=1 SV=1	B9HCD3_POPTR Autoinhibited H+ ATPase OS=Populus trichocarpa GN=POPTRDRAFT_801678 PE=3 SV=1
Ca_06763	5941166-5943542	7	IPR001680; WD40 repeat IPR017986; WD40-repeat-containing domain IPR019775; WD40 repeat, conserved site IPR019781; WD40 repeat, subgroup IPR019782; WD40 repeat 2	GO:0005515; protein binding; Molecular Function	damage specific DNA binding protein 2; K10140 DNA damage-binding protein 2	WDR76_XENLA WD repeat-containing protein 76 OS=Xenopus laevis GN=wdr76 PE=2 SV=1	C6TBA5_SOYBN Putative uncharacterized protein OS=Glycine max PE=2 SV=1
Ca_06762	5945396-5951667	7	IPR001208; DNA-dependent ATPase MCM IPR008048; MCM protein 5 IPR018525; DNA-dependent ATPase MCM, conserved site	GO:0003677; DNA binding; Molecular Function GO:0005524; ATP binding; Molecular Function GO:0005634; nucleus; Cellular Component GO:0006260; DNA replication; Biological Process GO:0006270; DNA-dependent DNA replication initiation; Biological Process	hypothetical protein LOC100261877; K02209 minichromosome maintenance protein 5 (cell division control protein 46)	MCM5A_XENLA DNA replication licensing factor mcm5-A OS=Xenopus laevis GN=mcm5-a PE=1 SV=2	B3GNI3_PEA Minichromosome maintenance 5 protein OS=Pisum sativum GN=MCM5 PE=2 SV=2
Ca_06761	5953535-5974786	7	IPR000999; Ribonuclease III IPR001159; Double-stranded RNA-binding IPR001650; Helicase, C-terminal IPR003100; Argonaute/Dicer protein, PAZ IPR005034; Dicer double-stranded RNA-binding fold IPR011545; DNA/RNA helicase, DEAD/DEAH box type, N-terminal IPR014001; DEAD-like helicase	GO:0003676; nucleic acid binding; Molecular Function GO:0003723; RNA binding; Molecular Function GO:0003725; double-stranded RNA binding; Molecular Function GO:0004386; helicase activity; Molecular Function GO:0004525; ribonuclease III activity; Molecular Function GO:0005515; protein binding; Molecular Function GO:0005524; ATP binding; Molecular Function GO:0005622; intracellular; Cellular Compon…	hypothetical protein LOC100243116; K11592 endoribonuclease Dicer [EC:3.1.26.-]	DCL4_ARATH Dicer-like protein 4 OS=Arabidopsis thaliana GN=DCL4 PE=1 SV=2	B9SC13_RICCO Ribonuclease III, putative OS=Ricinus communis GN=RCOM_0701500 PE=4 SV=1
Ca_06760	5979404-5995103	7	IPR002913; Lipid-binding START IPR009769; Domain of unknown function DUF1336	-	-	-	B9SC17_RICCO Lipid binding protein, putative OS=Ricinus communis GN=RCOM_0701540 PE=4 SV=1
Ca_06759	6007953-6008543	7	-	-	-	-	F6HCJ9_VITVI Putative uncharacterized protein OS=Vitis vinifera GN=VIT_11s0149g00060 PE=4 SV=1
Ca_06758	6010817-6014648	7	IPR003663; Sugar/inositol transporter IPR005828; General substrate transporter IPR005829; Sugar transporter, conserved site IPR020846; Major facilitator superfamily	GO:0005215; transporter activity; Molecular Function GO:0006810; transport; Biological Process GO:0016020; membrane; Cellular Component GO:0016021; integral to membrane; Cellular Component GO:0022891; substrate-specific transmembrane transporter activity; Molecular Function GO:0055085; transmembrane transport; Biological Process	HXT17; Hexose transporter, up-regulated in media containing raffinose and galactose at pH 7.7 versus pH 4.7, repressed by high levels of glucose; K08139 MFS transporter, SP family, sugar:H+ symporter	STP7_ARATH Sugar transport protein 7 OS=Arabidopsis thaliana GN=STP7 PE=2 SV=1	G7JHU7_MEDTR Hexose transporter OS=Medicago truncatula GN=MTR_4g116770 PE=3 SV=1
Ca_06757	6022435-6025390	7	IPR003663; Sugar/inositol transporter IPR005828; General substrate transporter IPR005829; Sugar transporter, conserved site IPR020846; Major facilitator superfamily	GO:0005215; transporter activity; Molecular Function GO:0006810; transport; Biological Process GO:0016020; membrane; Cellular Component GO:0016021; integral to membrane; Cellular Component GO:0022891; substrate-specific transmembrane transporter activity; Molecular Function GO:0055085; transmembrane transport; Biological Process	Sugar transporter family protein; K08139 MFS transporter, SP family, sugar:H+ symporter	STP7_ARATH Sugar transport protein 7 OS=Arabidopsis thaliana GN=STP7 PE=2 SV=1	G7JHV0_MEDTR Transmembrane 9 superfamily protein member OS=Medicago truncatula GN=MTR_4g116800 PE=3 SV=1
Ca_06756	6029181-6031151	7	IPR004240; Nonaspanin (TM9SF)	GO:0016021; integral to membrane; Cellular Component	-	TM9S4_HUMAN Transmembrane 9 superfamily member 4 OS=Homo sapiens GN=TM9SF4 PE=1 SV=2	B9SC23_RICCO Endosomal P24A protein, putative OS=Ricinus communis GN=RCOM_0701700 PE=4 SV=1
Ca_06754	6057925-6062457	7	IPR001356; Homeobox IPR005539; ELK IPR005540; KNOX1 IPR005541; KNOX2	GO:0003677; DNA binding; Molecular Function GO:0003700; sequence-specific DNA binding transcription factor activity; Molecular Function GO:0005634; nucleus; Cellular Component GO:0006355; regulation of transcription, DNA-dependent; Biological Process GO:0043565; sequence-specific DNA binding; Molecular Function	NOTCH4; notch 4; K02599 Notch	KNAT4_ARATH Homeobox protein knotted-1-like 4 OS=Arabidopsis thaliana GN=KNAT4 PE=2 SV=3	G7JHU3_MEDTR Homeobox protein knotted-1-like protein OS=Medicago truncatula GN=MTR_4g116730 PE=3 SV=1
Ca_06753	6064076-6064495	7	-	-	-	-	G7JHT3_MEDTR Putative uncharacterized protein OS=Medicago truncatula GN=MTR_4g116530 PE=4 SV=1
Ca_06752	6066716-6075220	7	IPR000270; Phox/Bem1p IPR000719; Protein kinase, catalytic domain IPR001245; Serine-threonine/tyrosine-protein kinase IPR002290; Serine/threonine-protein kinase domain IPR008271; Serine/threonine-protein kinase, active site IPR017441; Protein kinase, ATP binding site IPR020635; Tyrosine-protein kinase, catalytic domain	GO:0004672; protein kinase activity; Molecular Function GO:0004674; protein serine/threonine kinase activity; Molecular Function GO:0005515; protein binding; Molecular Function GO:0005524; ATP binding; Molecular Function GO:0006468; protein phosphorylation; Biological Process	hypothetical protein; K14510 serine/threonine-protein kinase CTR1 [EC:2.7.11.1]	CTR1_ARATH Serine/threonine-protein kinase CTR1 OS=Arabidopsis thaliana GN=CTR1 PE=1 SV=1	G7JHT2_MEDTR Dual specificity protein kinase pyk2 OS=Medicago truncatula GN=MTR_4g116520 PE=3 SV=1
Ca_06750	6089049-6089658	7	-	-	-	-	C6T1G3_SOYBN Putative uncharacterized protein OS=Glycine max PE=4 SV=1
Ca_06749	6095401-6097393	7	-	-	-	-	G7JHS8_MEDTR Putative uncharacterized protein OS=Medicago truncatula GN=MTR_4g116470 PE=4 SV=1
Ca_06748	6098530-6101604	7	-	-	-	-	G7JHS7_MEDTR RING finger protein OS=Medicago truncatula GN=MTR_4g116460 PE=4 SV=1
Ca_06747	6105778-6105969	7	-	-	-	-	-
Ca_06746	6108119-6113241	7	IPR000640; Translation elongation factor EFG/EF2, C-terminal IPR000795; Protein synthesis factor, GTP-binding IPR004161; Translation elongation factor EFTu/EF1A, domain 2 IPR005517; Translation elongation factor EFG/EF2, domain IV	GO:0003924; GTPase activity; Molecular Function GO:0005525; GTP binding; Molecular Function	hypothetical protein LOC100253367; K12852 116 kDa U5 small nuclear ribonucleoprotein component	U5S1_HUMAN 116 kDa U5 small nuclear ribonucleoprotein component OS=Homo sapiens GN=EFTUD2 PE=1 SV=1	G7JHS5_MEDTR 116 kDa U5 small nuclear ribonucleoprotein component OS=Medicago truncatula GN=MTR_4g116430 PE=4 SV=1
Ca_06745	6114153-6116603	7	IPR000222; Protein phosphatase 2C, manganese/magnesium aspartate binding site IPR001932; Protein phosphatase 2C-like IPR014045; Protein phosphatase 2C, N-terminal IPR015655; Protein phosphatase 2C	GO:0003824; catalytic activity; Molecular Function GO:0004722; protein serine/threonine phosphatase activity; Molecular Function GO:0006470; protein dephosphorylation; Biological Process GO:0008287; protein serine/threonine phosphatase complex; Cellular Component	Os06g0597200; K01090 protein phosphatase [EC:3.1.3.16]	P2C27_ORYSJ Probable protein phosphatase 2C 27 OS=Oryza sativa subsp. japonica GN=Os02g0799000 PE=2 SV=1	G7JHS4_MEDTR DNA-binding protein phosphatase 2C OS=Medicago truncatula GN=MTR_4g116420 PE=3 SV=1
Ca_06744	6128197-6135748	7	IPR000626; Ubiquitin IPR019955; Ubiquitin supergroup	GO:0005515; protein binding; Molecular Function	hypothetical protein; K04523 ubiquilin	BAG6_MOUSE Large proline-rich protein BAG6 OS=Mus musculus GN=Bag6 PE=1 SV=1	G7JGN6_MEDTR Large proline-rich protein BAT3 OS=Medicago truncatula GN=MTR_4g116370 PE=4 SV=1
Ca_06743	6137836-6138534	7	-	-	-	-	G7JGN6_MEDTR Large proline-rich protein BAT3 OS=Medicago truncatula GN=MTR_4g116370 PE=4 SV=1
Ca_06742	6147004-6148219	7	-	-	-	-	G7JGN5_MEDTR Putative uncharacterized protein OS=Medicago truncatula GN=MTR_4g116360 PE=4 SV=1
Ca_06741	6155107-6156113	7	IPR014946; Protein of unknown function DUF1817	-	-	-	G7JGN3_MEDTR Putative uncharacterized protein OS=Medicago truncatula GN=MTR_4g116350 PE=4 SV=1
Ca_06740	6166468-6168229	7	IPR006734; Protein of unknown function DUF597	-	hypothetical protein; K01170 tRNA-intron endonuclease [EC:3.1.27.9]	-	G7JGM8_MEDTR Zinc-binding protein OS=Medicago truncatula GN=MTR_4g116300 PE=4 SV=1
Ca_06739	6175928-6176263	7	-	-	-	-	C6T076_SOYBN Putative uncharacterized protein OS=Glycine max PE=4 SV=1
Ca_06738	6194738-6195343	7	-	-	-	-	B7FGS5_MEDTR Putative uncharacterized protein OS=Medicago truncatula PE=2 SV=1
Ca_06737	6208944-6209747	7	-	-	-	-	G7JGM1_MEDTR Putative uncharacterized protein OS=Medicago truncatula GN=MTR_4g116200 PE=4 SV=1
Ca_06736	6211736-6214050	7	IPR002048; Calcium-binding EF-hand IPR018247; EF-Hand 1, calcium-binding site IPR018248; EF-hand IPR018249; EF-HAND 2	GO:0005509; calcium ion binding; Molecular Function	mcfO; EF-hand domain-containing protein; K03454 mitochondrial carrier protein, MC family	MICU1_CAEEL Calcium uptake protein 1 homolog, mitochondrial OS=Caenorhabditis elegans GN=Y67H2A.4 PE=3 SV=2	G7JGM0_MEDTR Calcium binding atopy-related autoantigen OS=Medicago truncatula GN=MTR_4g116190 PE=4 SV=1
Ca_06735	6225176-6227338	7	IPR000270; Phox/Bem1p IPR013026; Tetratricopeptide repeat-containing IPR019734; Tetratricopeptide repeat	GO:0005515; protein binding; Molecular Function	Stress-induced-phosphoprotein, putative; K09553 stress-induced-phosphoprotein 1	UN45A_RAT Protein unc-45 homolog A OS=Rattus norvegicus GN=Unc45a PE=2 SV=1	F6HCH6_VITVI Putative uncharacterized protein OS=Vitis vinifera GN=VIT_11s0118g00490 PE=4 SV=1
Ca_06734	6257336-6257941	7	IPR008172; Adenylate cyclase	GO:0004016; adenylate cyclase activity; Molecular Function GO:0006171; cAMP biosynthetic process; Biological Process	-	-	G7JGL5_MEDTR Putative uncharacterized protein OS=Medicago truncatula GN=MTR_4g116130 PE=4 SV=1
Ca_06733	6257982-6258167	7	IPR018860; Anaphase-promoting complex, subunit CDC26	-	-	-	-
Ca_06732	6260540-6262263	7	-	-	-	-	G7JGL2_MEDTR Putative uncharacterized protein OS=Medicago truncatula GN=MTR_4g116080 PE=4 SV=1
Ca_06731	6275492-6278719	7	IPR005199; Glycoside hydrolase, family 79	GO:0016020; membrane; Cellular Component GO:0016798; hydrolase activity, acting on glycosyl bonds; Molecular Function	hypothetical protein; K07964 heparanase 1 [EC:3.2.1.-]	HPSE3_ARATH Heparanase-like protein 3 OS=Arabidopsis thaliana GN=At5g34940 PE=2 SV=2	G7JGL1_MEDTR Heparanase-like protein OS=Medicago truncatula GN=MTR_4g116070 PE=4 SV=1
Ca_06730	6279700-6286408	7	IPR011701; Major facilitator superfamily MFS-1 IPR020846; Major facilitator superfamily	GO:0055085; transmembrane transport; Biological Process	probable Na+-dependent inorganic phosphate cotransporter; K08193 MFS transporter, ACS family, solute carrier family 17 (sodium-dependent inorganic phosphate cotransporter), other	ANTR6_ARATH Probable anion transporter 6, chloroplastic OS=Arabidopsis thaliana GN=ANTR6 PE=2 SV=1	G7JGK7_MEDTR Putative uncharacterized protein OS=Medicago truncatula GN=MTR_4g116030 PE=4 SV=1
Ca_06729	6288881-6290537	7	IPR005123; Oxoglutarate/iron-dependent oxygenase	GO:0016491; oxidoreductase activity; Molecular Function	ANS2; anthocyanidin synthase (EC:1.14.11.19); K05277 leucoanthocyanidin dioxygenase [EC:1.14.11.19]	SRG1_ARATH Protein SRG1 OS=Arabidopsis thaliana GN=SRG1 PE=2 SV=1	G7JGK5_MEDTR Flavonol synthase/flavanone 3-hydroxylase OS=Medicago truncatula GN=MTR_4g116010 PE=3 SV=1
Ca_06728	6292323-6294762	7	IPR003099; Prephenate dehydrogenase	GO:0004665; prephenate dehydrogenase (NADP+) activity; Molecular Function GO:0006571; tyrosine biosynthetic process; Biological Process	hypothetical protein ; K12586 exosome complex component RRP43	TYRA1_ARATH Arogenate dehydrogenase 1, chloroplastic OS=Arabidopsis thaliana GN=TYRAAT1 PE=1 SV=1	G7JGK2_MEDTR Arogenate dehydrogenase OS=Medicago truncatula GN=MTR_4g115980 PE=4 SV=1
Ca_06727	6301865-6304242	7	IPR003099; Prephenate dehydrogenase	GO:0004665; prephenate dehydrogenase (NADP+) activity; Molecular Function GO:0006571; tyrosine biosynthetic process; Biological Process	hypothetical protein ; K12586 exosome complex component RRP43	TYRA1_ARATH Arogenate dehydrogenase 1, chloroplastic OS=Arabidopsis thaliana GN=TYRAAT1 PE=1 SV=1	G7JGK2_MEDTR Arogenate dehydrogenase OS=Medicago truncatula GN=MTR_4g115980 PE=4 SV=1
Ca_06726	6306146-6310005	7	IPR004131; Pyrophosphate-energised proton pump	GO:0004427; inorganic diphosphatase activity; Molecular Function GO:0009678; hydrogen-translocating pyrophosphatase activity; Molecular Function GO:0015992; proton transport; Biological Process GO:0016020; membrane; Cellular Component	vacuolar H+-translocating inorganic pyrophosphatase (EC:3.6.1.1); K01507 inorganic pyrophosphatase [EC:3.6.1.1]	AVP_VIGRR Pyrophosphate-energized vacuolar membrane proton pump OS=Vigna radiata var. radiata PE=1 SV=3	B6DXD7_MEDTR Vacuolar proton-inorganic pyrophosphatase OS=Medicago truncatula GN=VP1 PE=2 SV=1
Ca_06725	6322994-6325372	7	IPR001841; Zinc finger, RING-type	GO:0005515; protein binding; Molecular Function GO:0008270; zinc ion binding; Molecular Function	-	-	G7JGJ7_MEDTR Putative uncharacterized protein OS=Medicago truncatula GN=MTR_4g115930 PE=4 SV=1
Ca_06724	6329539-6332301	7	IPR007235; Glycosyl transferase, family 28, C-terminal IPR009695; Diacylglycerol glucosyltransferase, N-terminal	GO:0005975; carbohydrate metabolic process; Biological Process GO:0009247; glycolipid biosynthetic process; Biological Process GO:0016758; transferase activity, transferring hexosyl groups; Molecular Function GO:0030246; carbohydrate binding; Molecular Function GO:0030259; lipid glycosylation; Biological Process	hypothetical protein LOC100248939; K03715 1,2-diacylglycerol 3-beta-galactosyltransferase [EC:2.4.1.46]	MGDG2_ARATH Monogalactosyldiacylglycerol synthase 2, chloroplastic OS=Arabidopsis thaliana GN=MGD2 PE=1 SV=1	G7JGJ5_MEDTR Monogalactosyldiacylglycerol synthase OS=Medicago truncatula GN=MTR_4g115920 PE=4 SV=1
Ca_06723	6341052-6343178	7	IPR007204; ARP2/3 complex, p21-Arc subunit	GO:0005856; cytoskeleton; Cellular Component GO:0030833; regulation of actin filament polymerization; Biological Process	hypothetical protein; K05756 actin related protein 2/3 complex, subunit 3	ARPC3_MOUSE Actin-related protein 2/3 complex subunit 3 OS=Mus musculus GN=Arpc3 PE=1 SV=3	G7JGJ3_MEDTR Actin-related protein 2/3 complex subunit OS=Medicago truncatula GN=MTR_4g115900 PE=4 SV=1
Ca_06722	6345743-6347144	7	-	-	-	-	G7JGJ2_MEDTR Putative uncharacterized protein OS=Medicago truncatula GN=MTR_4g115890 PE=4 SV=1
Ca_06721	6348883-6351575	7	IPR002885; Pentatricopeptide repeat	-	nucleobase:cation symporter; K03457 nucleobase:cation symporter-1, NCS1 family	PP444_ARATH Pentatricopeptide repeat-containing protein At5g64320, mitochondrial OS=Arabidopsis thaliana GN=At5g64320 PE=2 SV=1	G7KCZ2_MEDTR Auxin response factor OS=Medicago truncatula GN=MTR_5g090170 PE=4 SV=1
Ca_06720	6353061-6355420	7	IPR001394; Peptidase C19, ubiquitin carboxyl-terminal hydrolase 2 IPR001607; Zinc finger, UBP-type IPR018200; Peptidase C19, ubiquitin carboxyl-terminal hydrolase 2, conserved site	GO:0004221; ubiquitin thiolesterase activity; Molecular Function GO:0006511; ubiquitin-dependent protein catabolic process; Biological Process GO:0008270; zinc ion binding; Molecular Function	Ubiquitin carboxyl-terminal hydrolase, putative (EC:3.1.2.15); K11366 ubiquitin carboxyl-terminal hydrolase 22/27/51 [EC:3.1.2.15]	UBP22_ARATH Ubiquitin carboxyl-terminal hydrolase 22 OS=Arabidopsis thaliana GN=UBP22 PE=2 SV=1	G7JGJ1_MEDTR Ubiquitin carboxyl-terminal hydrolase OS=Medicago truncatula GN=MTR_4g115880 PE=3 SV=1
Ca_06719	6355977-6357197	7	IPR001394; Peptidase C19, ubiquitin carboxyl-terminal hydrolase 2 IPR018200; Peptidase C19, ubiquitin carboxyl-terminal hydrolase 2, conserved site	GO:0004221; ubiquitin thiolesterase activity; Molecular Function GO:0006511; ubiquitin-dependent protein catabolic process; Biological Process	Ubiquitin carboxyl-terminal hydrolase, putative (EC:3.1.2.15); K11366 ubiquitin carboxyl-terminal hydrolase 22/27/51 [EC:3.1.2.15]	UBP22_ARATH Ubiquitin carboxyl-terminal hydrolase 22 OS=Arabidopsis thaliana GN=UBP22 PE=2 SV=1	G7JGJ1_MEDTR Ubiquitin carboxyl-terminal hydrolase OS=Medicago truncatula GN=MTR_4g115880 PE=3 SV=1
Ca_06718	6360679-6362328	7	IPR001023; Heat shock protein Hsp70 IPR013126; Heat shock protein 70	GO:0005524; ATP binding; Molecular Function	Os05g0460000; K03283 heat shock 70kDa protein 1/8	HSP7H_ARATH Heat shock 70 kDa protein 8 OS=Arabidopsis thaliana GN=HSP70-8 PE=2 SV=1	G7K2D5_MEDTR Heat shock 70 kDa protein OS=Medicago truncatula GN=MTR_5g006180 PE=3 SV=1
Ca_06717	6363522-6365124	7	-	-	-	-	C6SWY2_SOYBN Putative uncharacterized protein OS=Glycine max PE=4 SV=1
Ca_06716	6368673-6369112	7	-	-	-	-	-
Ca_06715	6375966-6378215	7	IPR006703; AIG1	GO:0005525; GTP binding; Molecular Function	-	TOC90_ARATH Translocase of chloroplast 90, chloroplastic OS=Arabidopsis thaliana GN=TOC90 PE=1 SV=1	G7JFF9_MEDTR Translocase of chloroplast OS=Medicago truncatula GN=MTR_4g115710 PE=4 SV=1
Ca_06714	6381552-6382694	7	-	-	-	-	G7JFF7_MEDTR Putative uncharacterized protein OS=Medicago truncatula GN=MTR_4g115690 PE=4 SV=1
Ca_06713	6385261-6387799	7	IPR001509; NAD-dependent epimerase/dehydratase	GO:0003824; catalytic activity; Molecular Function GO:0044237; cellular metabolic process; Biological Process GO:0050662; coenzyme binding; Molecular Function	similar to NADPH-flavin reductase; K05901 biliverdin reductase / flavin reductase [EC:1.3.1.24 1.5.1.30]	Y2446_ARATH Uncharacterized protein At2g34460, chloroplastic OS=Arabidopsis thaliana GN=At2g34460 PE=1 SV=1	G7JFG1_MEDTR Putative uncharacterized protein OS=Medicago truncatula GN=MTR_4g115730 PE=4 SV=1
Ca_06712	6389656-6393906	7	IPR004843; Metallo-dependent phosphatase	GO:0016787; hydrolase activity; Molecular Function	hypothetical protein LOC100248170; K01113 alkaline phosphatase D [EC:3.1.3.1]	PPA26_ARATH Bifunctional purple acid phosphatase 26 OS=Arabidopsis thaliana GN=PAP26 PE=1 SV=1	Q8L5E1_LUPLU Acid phosphatase OS=Lupinus luteus GN=acPase1 PE=2 SV=1
Ca_06711	6396487-6403766	7	IPR000008; C2 calcium-dependent membrane targeting IPR018029; C2 membrane targeting protein IPR020477; C2 region	GO:0005515; protein binding; Molecular Function	RASA4; RAS p21 protein activator 4; K03008 DNA-directed RNA polymerase II subunit RPB11	ESYT3_HUMAN Extended synaptotagmin-3 OS=Homo sapiens GN=ESYT3 PE=2 SV=1	G7JFF5_MEDTR Synaptotagmin-1 OS=Medicago truncatula GN=MTR_4g115660 PE=4 SV=1
Ca_06710	6408293-6412426	7	IPR000644; Cystathionine beta-synthase, core IPR001807; Chloride channel, voltage gated IPR002251; Chloride channel ClC-plant	GO:0005247; voltage-gated chloride channel activity; Molecular Function GO:0005515; protein binding; Molecular Function GO:0006821; chloride transport; Biological Process GO:0016020; membrane; Cellular Component GO:0055085; transmembrane transport; Biological Process	hypothetical protein; K05016 chloride channel 7	CLCG_ARATH Putative chloride channel-like protein CLC-g OS=Arabidopsis thaliana GN=CBSCLC6 PE=2 SV=2	G7JFF4_MEDTR Putative uncharacterized protein OS=Medicago truncatula GN=MTR_4g115640 PE=4 SV=1
Ca_06709	6413822-6416961	7	IPR000719; Protein kinase, catalytic domain IPR001245; Serine-threonine/tyrosine-protein kinase IPR002290; Serine/threonine-protein kinase domain IPR008271; Serine/threonine-protein kinase, active site IPR017441; Protein kinase, ATP binding site IPR020635; Tyrosine-protein kinase, catalytic domain	GO:0004672; protein kinase activity; Molecular Function GO:0004674; protein serine/threonine kinase activity; Molecular Function GO:0005524; ATP binding; Molecular Function GO:0006468; protein phosphorylation; Biological Process	protein kinase family protein; K04733 interleukin-1 receptor-associated kinase 4 [EC:2.7.11.1]	Y4330_ARATH Probable leucine-rich repeat receptor-like protein kinase At4g00330 OS=Arabidopsis thaliana GN=At4g00330 PE=2 SV=1	G7JFF3_MEDTR Receptor-like protein kinase OS=Medicago truncatula GN=MTR_4g115630 PE=3 SV=1
Ca_06708	6425727-6432201	7	IPR000368; Sucrose synthase IPR001296; Glycosyl transferase, group 1 IPR006380; Sucrose-phosphate synthase	GO:0005985; sucrose metabolic process; Biological Process GO:0009058; biosynthetic process; Biological Process	hypothetical protein LOC100241955; K00696 sucrose-phosphate synthase [EC:2.4.1.14]	SPSA_VICFA Probable sucrose-phosphate synthase OS=Vicia faba GN=SPS PE=2 SV=1	Q9AXK3_MEDSA Sucrose-phosphate synthase OS=Medicago sativa PE=2 SV=2
Ca_06707	6449014-6451744	7	IPR004254; Hly-III-related	GO:0016021; integral to membrane; Cellular Component	hypothetical protein LOC100262689; K07297 adiponectin receptor	ADRL_DROME ADIPOR-like receptor CG5315 OS=Drosophila melanogaster GN=CG5315 PE=2 SV=2	G7JFE9_MEDTR Adiponectin receptor protein OS=Medicago truncatula GN=MTR_4g115580 PE=4 SV=1
Ca_06706	6459939-6466334	7	IPR004263; Exostosin-like	GO:0016020; membrane; Cellular Component	similar to Exostosin-1a (Glucuronosyl-N-acetylglucosaminyl-proteoglycan/N- acetylglucosaminyl-proteoglycan 4-alpha-N-acetylglucosaminyltransferase 1a) (Multiple exostoses protein 1 homolog a); K02366 glucuronyl/N-acetylglucosaminyl transferase EXT1 [EC:2.4.1.224 2.4.1.225]	GLYT5_ARATH Probable glycosyltransferase At5g20260 OS=Arabidopsis thaliana GN=At5g20260 PE=3 SV=3	G7JFD7_MEDTR Xylogalacturonan beta-1,3-xylosyltransferase OS=Medicago truncatula GN=MTR_4g115460 PE=4 SV=1
Ca_06705	6467841-6477763	7	IPR007244; Mak10 subunit, NatC N(alpha)-terminal acetyltransferase	-	-	NAA35_CHICK N-alpha-acetyltransferase 35, NatC auxiliary subunit OS=Gallus gallus GN=NAA35 PE=2 SV=1	G7JFD6_MEDTR MAK10-like protein OS=Medicago truncatula GN=MTR_4g115450 PE=4 SV=1
Ca_06704	6488370-6493512	7	IPR011417; ANTH IPR013809; Epsin-like, N-terminal	GO:0005543; phospholipid binding; Molecular Function	-	CAP10_ARATH Putative clathrin assembly protein At5g35200 OS=Arabidopsis thaliana GN=At5g35200 PE=1 SV=1	G7JFD3_MEDTR Putative uncharacterized protein OS=Medicago truncatula GN=MTR_4g115420 PE=4 SV=1
Ca_06703	6498601-6502238	7	-	-	-	-	G7JFD1_MEDTR Putative uncharacterized protein OS=Medicago truncatula GN=MTR_4g115400 PE=4 SV=1
Ca_06702	6520496-6521269	7	IPR003612; Plant lipid transfer protein/seed storage/trypsin-alpha amylase inhibitor	-	hypothetical protein ; K14007 protein transport protein SEC24	PRF1_SOLLC 36.4 kDa proline-rich protein OS=Solanum lycopersicum GN=TPRP-F1 PE=2 SV=1	F6HHB3_VITVI Putative uncharacterized protein OS=Vitis vinifera GN=VIT_11s0016g05840 PE=4 SV=1
Ca_06701	6527802-6533458	7	IPR001440; Tetratricopeptide TPR-1 IPR013026; Tetratricopeptide repeat-containing IPR019734; Tetratricopeptide repeat	GO:0005515; protein binding; Molecular Function	hypothetical protein LOC100252496; K12607 CCR4-NOT transcription complex subunit 10	CNOTA_MOUSE CCR4-NOT transcription complex subunit 10 OS=Mus musculus GN=Cnot10 PE=2 SV=1	G7JFC6_MEDTR CCR4-NOT transcription complex subunit 10-B OS=Medicago truncatula GN=MTR_4g115350 PE=4 SV=1
Ca_06700	6538742-6545025	7	IPR022031; Rap1-interacting factor 1 N-terminal	-	hypothetical protein; K11138 telomere-associated protein RIF1	RIF1_MOUSE Telomere-associated protein RIF1 OS=Mus musculus GN=Rif1 PE=1 SV=2	G7JFC5_MEDTR Telomere-associated protein RIF1 OS=Medicago truncatula GN=MTR_4g115340 PE=4 SV=1
Ca_20269	40657971-40659533	7	IPR004316; RAG1-activating protein-1-related	GO:0016021; integral to membrane; Cellular Component	-	SWET2_ARATH Bidirectional sugar transporter SWEET2 OS=Arabidopsis thaliana GN=SWEET2 PE=2 SV=1	G7ZV40_MEDTR Protein RUPTURED POLLEN GRAIN OS=Medicago truncatula GN=MTR_019s0007 PE=4 SV=1
Ca_10054	32199876-32204379	7	IPR000907; Lipoxygenase IPR001024; Lipoxygenase, LH2 IPR001246; Lipoxygenase, plant IPR013819; Lipoxygenase, C-terminal IPR020833; Lipoxygenase, iron binding site IPR020834; Lipoxygenase, conserved site	GO:0005506; iron ion binding; Molecular Function GO:0005515; protein binding; Molecular Function GO:0016165; lipoxygenase activity; Molecular Function GO:0016702; oxidoreductase activity, acting on single donors with incorporation of molecular oxygen, incorporation of two atoms of oxygen; Molecular Function GO:0046872; metal ion binding; Molecular Function GO:0055114; oxidation-reduction process;…	LOX1; LOX1; lipoxygenase (EC:1.13.11.12); K00454 lipoxygenase [EC:1.13.11.12]	LOXX_SOYBN Seed linoleate 9S-lipoxygenase OS=Glycine max GN=LOX1.4 PE=1 SV=1	G7LIZ7_MEDTR Lipoxygenase OS=Medicago truncatula GN=MTR_8g018730 PE=3 SV=1
Ca_10053	32207878-32208231	7	-	-	-	-	-
Ca_10052	32216242-32222389	7	IPR000089; Biotin/lipoyl attachment IPR001078; 2-oxoacid dehydrogenase acyltransferase, catalytic domain IPR003016; 2-oxo acid dehydrogenase, lipoyl-binding site IPR004167; E3 binding	GO:0008152; metabolic process; Biological Process GO:0008415; acyltransferase activity; Molecular Function	dihydrolipoamide acetyltransferase component of pyruvate dehydrogenase, putative (EC:2.3.1.168); K00627 pyruvate dehydrogenase E2 component (dihydrolipoamide acetyltransferase) [EC:2.3.1.12]	OPD23_ARATH Dihydrolipoyllysine-residue acetyltransferase component 3 of pyruvate dehydrogenase complex, mitochondrial OS=Arabidopsis thaliana GN=At1g54220 PE=1 SV=1	G7LJ01_MEDTR Dihydrolipoyllysine-residue acetyltransferase component 2 of pyruvate dehydrogenase complex OS=Medicago truncatula GN=MTR_8g018770 PE=3 SV=1
Ca_10051	32225779-32226333	7	IPR003397; Mitochondrial inner membrane translocase complex, subunit Tim17/22	GO:0005743; mitochondrial inner membrane; Cellular Component GO:0008565; protein transporter activity; Molecular Function GO:0015031; protein transport; Biological Process	-	TIM23_SCHPO Mitochondrial import inner membrane translocase subunit tim23 OS=Schizosaccharomyces pombe (strain 972 / ATCC 24843) GN=tim23 PE=2 SV=1	G7LJ02_MEDTR Translocase of inner mitochondrial membrane TIM23 OS=Medicago truncatula GN=MTR_8g018780 PE=4 SV=1
Ca_10050	32229170-32230520	7	IPR003653; Peptidase C48, SUMO/Sentrin/Ubl1	GO:0006508; proteolysis; Biological Process GO:0008234; cysteine-type peptidase activity; Molecular Function	-	-	G7I2F3_MEDTR Ubiquitin-like-specific protease OS=Medicago truncatula GN=MTR_1g040750 PE=4 SV=1
Ca_10049	32233981-32241269	7	IPR001930; Peptidase M1, alanine aminopeptidase/leukotriene A4 hydrolase IPR014782; Peptidase M1, membrane alanine aminopeptidase, N-terminal	GO:0006508; proteolysis; Biological Process GO:0008237; metallopeptidase activity; Molecular Function GO:0008270; zinc ion binding; Molecular Function	hypothetical protein; K08776 puromycin-sensitive aminopeptidase [EC:3.4.11.-]	PSA_MOUSE Puromycin-sensitive aminopeptidase OS=Mus musculus GN=Npepps PE=1 SV=2	G7LJ03_MEDTR Aminopeptidase N OS=Medicago truncatula GN=MTR_8g018790 PE=4 SV=1
Ca_10048	32242067-32243854	7	-	-	-	-	G7LJ04_MEDTR Putative uncharacterized protein OS=Medicago truncatula GN=MTR_8g018800 PE=4 SV=1
Ca_10047	32245492-32246667	7	-	-	-	-	C6SXW3_SOYBN Putative uncharacterized protein OS=Glycine max PE=2 SV=1
Ca_10046	32254409-32259571	7	IPR000719; Protein kinase, catalytic domain IPR002290; Serine/threonine-protein kinase domain IPR006016; UspA IPR008271; Serine/threonine-protein kinase, active site IPR017442; Serine/threonine-protein kinase-like domain IPR020635; Tyrosine-protein kinase, catalytic domain	GO:0004672; protein kinase activity; Molecular Function GO:0004674; protein serine/threonine kinase activity; Molecular Function GO:0005524; ATP binding; Molecular Function GO:0006468; protein phosphorylation; Biological Process GO:0006950; response to stress; Biological Process	protein kinase family protein; K04733 interleukin-1 receptor-associated kinase 4 [EC:2.7.11.1]	PUB35_ARATH U-box domain-containing protein 35 OS=Arabidopsis thaliana GN=PUB35 PE=1 SV=2	G7LJ06_MEDTR U-box domain-containing protein OS=Medicago truncatula GN=MTR_8g018830 PE=4 SV=1
Ca_10045	32268829-32312367	7	IPR002035; von Willebrand factor, type A IPR002078; RNA polymerase sigma factor 54, interaction IPR003593; ATPase, AAA+ type, core IPR011704; ATPase, AAA-5	GO:0000166; nucleotide binding; Molecular Function GO:0005515; protein binding; Molecular Function GO:0005524; ATP binding; Molecular Function GO:0005622; intracellular; Cellular Component GO:0006355; regulation of transcription, DNA-dependent; Biological Process GO:0008134; transcription factor binding; Molecular Function GO:0016887; ATPase activity; Molecular Function GO:0017111; nucleoside-tri…	similar to midasin-related; K14572 midasin	MDN1_DICDI Midasin OS=Dictyostelium discoideum GN=mdn1 PE=3 SV=2	G7LJ09_MEDTR Midasin OS=Medicago truncatula GN=MTR_8g018890 PE=4 SV=1
Ca_10044	32324699-32325265	7	-	-	-	-	G7ZXG9_MEDTR Putative uncharacterized protein OS=Medicago truncatula GN=MTR_057s0006 PE=4 SV=1
Ca_10043	32343657-32345977	7	-	-	-	-	D7SQ25_VITVI Putative uncharacterized protein OS=Vitis vinifera GN=VIT_13s0019g01850 PE=4 SV=1
Ca_10042	32373397-32374449	7	IPR002067; Mitochondrial carrier protein IPR018108; Mitochondrial substrate/solute carrier	GO:0005488; binding; Molecular Function GO:0005743; mitochondrial inner membrane; Cellular Component GO:0006810; transport; Biological Process GO:0055085; transmembrane transport; Biological Process	hypothetical LOC584279; K03454 mitochondrial carrier protein, MC family	S2544_PONAB Solute carrier family 25 member 44 OS=Pongo abelii GN=SLC25A44 PE=2 SV=2	B9S5T5_RICCO Mitochondrial carrier protein RIM2, putative OS=Ricinus communis GN=RCOM_0654330 PE=3 SV=1
Ca_11514	8840477-8842471	8	IPR001092; Helix-loop-helix DNA-binding domain	GO:0030528; transcription regulator activity; Molecular Function GO:0045449; regulation of transcription; Biological Process	similar to MYC transcription factor; K13422 transcription factor MYC2	RAP1_ARATH Transcription factor MYC2 OS=Arabidopsis thaliana GN=RAP1 PE=1 SV=2	G7KF32_MEDTR BHLH transcription factor OS=Medicago truncatula GN=MTR_5g030430 PE=4 SV=1
Ca_11516	8855705-8856217	8	-	-	-	-	G7KF36_MEDTR Putative uncharacterized protein OS=Medicago truncatula GN=MTR_5g030480 PE=4 SV=1
Ca_11515	8853543-8853869	8	-	-	-	-	G7KF35_MEDTR Putative uncharacterized protein OS=Medicago truncatula GN=MTR_5g030470 PE=4 SV=1
Ca_11524	8931865-8938608	8	IPR001272; Phosphoenolpyruvate carboxykinase, ATP-utilising	GO:0004612; phosphoenolpyruvate carboxykinase (ATP) activity; Molecular Function GO:0005524; ATP binding; Molecular Function GO:0006094; gluconeogenesis; Biological Process	Phosphoenolpyruvate carboxykinase [ATP], putative (EC:4.1.1.49); K01610 phosphoenolpyruvate carboxykinase (ATP) [EC:4.1.1.49]	PCKA_ARATH Phosphoenolpyruvate carboxykinase [ATP] OS=Arabidopsis thaliana GN=PCKA PE=1 SV=1	G7KF50_MEDTR Phosphoenolpyruvate carboxykinase OS=Medicago truncatula GN=MTR_5g030620 PE=3 SV=1
Ca_11532	9093326-9095416	8	-	-	-	-	-
Ca_11533	9097268-9101360	8	IPR001764; Glycoside hydrolase, family 3, N-terminal IPR002772; Glycoside hydrolase, family 3, C-terminal	GO:0004553; hydrolase activity, hydrolyzing O-glycosyl compounds; Molecular Function GO:0005975; carbohydrate metabolic process; Biological Process	hypothetical protein LOC100252178; K05349 beta-glucosidase [EC:3.2.1.21]	BXL6_ARATH Probable beta-D-xylosidase 6 OS=Arabidopsis thaliana GN=BXL6 PE=2 SV=1	G7KF67_MEDTR Beta-D-xylosidase OS=Medicago truncatula GN=MTR_5g030860 PE=4 SV=1
Ca_11539	9151680-9159194	8	IPR001567; Peptidase M3A/M3B, thimet/oligopeptidase F	GO:0004222; metalloendopeptidase activity; Molecular Function GO:0006508; proteolysis; Biological Process	hypothetical protein; K01414 oligopeptidase A [EC:3.4.24.70]	OPDA_HAEIN Oligopeptidase A OS=Haemophilus influenzae (strain ATCC 51907 / DSM 11121 / KW20 / Rd) GN=prlC PE=3 SV=1	A9YWR9_MEDTR Oligopeptidase A OS=Medicago truncatula PE=3 SV=1
Ca_11542	9218185-9219003	8	IPR001220; Legume lectin, beta chain IPR019825; Legume lectin, beta chain, Mn/Ca-binding site	GO:0005488; binding; Molecular Function	-	LEC2_CLAKE Agglutinin-2 OS=Cladrastis kentukea PE=1 SV=1	A9YWS2_MEDTR Lectin OS=Medicago truncatula GN=MTR_5g031030 PE=4 SV=1
Ca_18423	10309116-10309580	8	IPR013094; Alpha/beta hydrolase fold-3	GO:0008152; metabolic process; Biological Process GO:0016787; hydrolase activity; Molecular Function	GID1C; GID1C (GA INSENSITIVE DWARF1C); hydrolase; K14493 gibberellin receptor GID1 [EC:3.-.-.-]	CXE18_ARATH Probable carboxylesterase 18 OS=Arabidopsis thaliana GN=CXE18 PE=2 SV=1	G7KP79_MEDTR Neutral cholesterol ester hydrolase OS=Medicago truncatula GN=MTR_6g065370 PE=4 SV=1
Ca_11540	9168523-9173247	8	IPR001085; Serine hydroxymethyltransferase IPR019798; Serine hydroxymethyltransferase, pyridoxal phosphate binding site	GO:0004372; glycine hydroxymethyltransferase activity; Molecular Function GO:0006544; glycine metabolic process; Biological Process GO:0006563; L-serine metabolic process; Biological Process GO:0030170; pyridoxal phosphate binding; Molecular Function	SHM1; SHM1 (SERINE TRANSHYDROXYMETHYLTRANSFERASE 1); glycine hydroxymethyltransferase/ poly(U) binding (EC:2.1.2.1); K00600 glycine hydroxymethyltransferase [EC:2.1.2.1]	GLYM_PEA Serine hydroxymethyltransferase, mitochondrial OS=Pisum sativum PE=1 SV=1	A9YWS0_MEDTR Serine hydroxymethyltransferase OS=Medicago truncatula GN=MTR_5g030950 PE=3 SV=1
Ca_11541	9193286-9195108	8	IPR002487; Transcription factor, K-box	GO:0003700; sequence-specific DNA binding transcription factor activity; Molecular Function GO:0005634; nucleus; Cellular Component GO:0006355; regulation of transcription, DNA-dependent; Biological Process	hypothetical protein LOC100244955; K09264 MADS-box transcription factor, plant	AGL17_ARATH Agamous-like MADS-box protein AGL17 OS=Arabidopsis thaliana GN=AGL17 PE=2 SV=2	G7KGG1_MEDTR MADS-box protein OS=Medicago truncatula GN=MTR_5g031000 PE=3 SV=1
