# Supplementary material for: Genomic Analysis of Vavilov’s Historic Chickpea Landraces Reveals Footprints of Environmental and Human Selection
Source: Int J Mol Sci. 2020 May 31;21(11):3952. doi: 10.3390/ijms21113952 (PMC7313079; doi:10.3390/ijms21113952)
Supplement: Supplementary file 1 [file ijms-21-03952-s001.zip › TableS8.xlsx]

## Sheet: Haploblocks
		Table S8 Haploblocks inferred by Haploview tools.
Haploblock	Chromosome	Haploblock position	SNPs in haploblock
Ca1_Block_1	1	396182-430735	Ca1: 396182,Ca1: 399402,Ca1: 414572,Ca1: 420648,Ca1: 420734,Ca1: 430734,Ca1: 430735
Ca1_Block_2	1	737218-1123223	Ca1: 737218,Ca1: 752961,Ca1: 771989,Ca1: 838327,Ca1: 845841,Ca1: 872675,Ca1: 882266,Ca1: 952261,Ca1: 970249,Ca1: 978810,Ca1: 1023011,Ca1: 1033034,Ca1: 1123177,Ca1: 1123223
Ca1_Block_3	1	1224263-1242015	Ca1: 1224263,Ca1: 1242015
Ca1_Block_4	1	1533118-1545721	Ca1: 1533118,Ca1: 1536432,Ca1: 1545721
Ca1_Block_5	1	1826915-1970785	Ca1: 1826915,Ca1: 1858717,Ca1: 1859502,Ca1: 1859532,Ca1: 1859541,Ca1: 1963329,Ca1: 1968309,Ca1: 1970785
Ca1_Block_6	1	2218700-2225735	Ca1: 2218700,Ca1: 2225735
Ca1_Block_7	1	2238867-2238891	Ca1: 2238867,Ca1: 2238888,Ca1: 2238891
Ca1_Block_8	1	2330274-2330287	Ca1: 2330274,Ca1: 2330287
Ca1_Block_9	1	2375294-2375928	Ca1: 2375294,Ca1: 2375928
Ca1_Block_10	1	2854316-2869033	Ca1: 2854316,Ca1: 2869033
Ca1_Block_11	1	5391354-5391371	Ca1: 5391354,Ca1: 5391371
Ca1_Block_12	1	5428080-5511996	Ca1: 5428080,Ca1: 5480709,Ca1: 5511968,Ca1: 5511996
Ca1_Block_13	1	6277507-6277549	Ca1: 6277507,Ca1: 6277549
Ca1_Block_14	1	6327680-6335995	Ca1: 6327680,Ca1: 6327709,Ca1: 6335995
Ca1_Block_15	1	6434895-6434924	Ca1: 6434895,Ca1: 6434924
Ca1_Block_16	1	6444417-6444438	Ca1: 6444417,Ca1: 6444438
Ca1_Block_17	1	6483872-6483911	Ca1: 6483872,Ca1: 6483911
Ca1_Block_18	1	7478974-7782518	Ca1: 7478974,Ca1: 7489046,Ca1: 7497743,Ca1: 7498240,Ca1: 7529146,Ca1: 7529156,Ca1: 7565347,Ca1: 7638718,Ca1: 7638736,Ca1: 7679875,Ca1: 7710021,Ca1: 7782512,Ca1: 7782514,Ca1: 7782518
Ca1_Block_19	1	7793021-8166033	Ca1: 7793021,Ca1: 7843735,Ca1: 7978738,Ca1: 7996105,Ca1: 7996133,Ca1: 8004691,Ca1: 8131436,Ca1: 8131450,Ca1: 8131454,Ca1: 8166033
Ca1_Block_20	1	8712823-8728442	Ca1: 8712823,Ca1: 8726473,Ca1: 8728442
Ca1_Block_21	1	8849631-9267507	Ca1: 8849631,Ca1: 8862913,Ca1: 8871203,Ca1: 8986537,Ca1: 8999387,Ca1: 9016272,Ca1: 9016288,Ca1: 9024339,Ca1: 9032848,Ca1: 9055446,Ca1: 9074506,Ca1: 9096456,Ca1: 9120585,Ca1: 9120611,Ca1: 9165805,Ca1: 9165817,Ca1: 9176297,Ca1: 9267507
Ca1_Block_22	1	9268282-9268307	Ca1: 9268282,Ca1: 9268307
Ca1_Block_23	1	9324772-9379381	Ca1: 9324772,Ca1: 9331447,Ca1: 9331459,Ca1: 9331481,Ca1: 9379381
Ca1_Block_24	1	11293696-11400073	Ca1: 11293696,Ca1: 11329379,Ca1: 11333491,Ca1: 11333521,Ca1: 11333531,Ca1: 11342281,Ca1: 11371968,Ca1: 11372006,Ca1: 11375680,Ca1: 11400073
Ca1_Block_25	1	11575751-11691084	Ca1: 11575751,Ca1: 11609631,Ca1: 11609677,Ca1: 11640584,Ca1: 11640593,Ca1: 11666604,Ca1: 11666624,Ca1: 11691084
Ca1_Block_26	1	13509382-13699033	Ca1: 13509382,Ca1: 13509384,Ca1: 13526551,Ca1: 13526561,Ca1: 13633162,Ca1: 13699033
Ca1_Block_27	1	18015960-18470050	Ca1: 18015960,Ca1: 18163100,Ca1: 18163132,Ca1: 18163143,Ca1: 18207095,Ca1: 18210524,Ca1: 18256082,Ca1: 18256103,Ca1: 18273640,Ca1: 18273664,Ca1: 18381505,Ca1: 18468432,Ca1: 18470050
Ca1_Block_28	1	19561434-19804162	Ca1: 19561434,Ca1: 19561438,Ca1: 19563356,Ca1: 19566555,Ca1: 19572921,Ca1: 19586280,Ca1: 19663532,Ca1: 19672609,Ca1: 19688669,Ca1: 19688677,Ca1: 19804162
Ca1_Block_29	1	21999608-22016193	Ca1: 21999608,Ca1: 22016193
Ca1_Block_30	1	26904125-27012952	Ca1: 26904125,Ca1: 26966675,Ca1: 27012950,Ca1: 27012952
Ca1_Block_31	1	28628201-28641687	Ca1: 28628201,Ca1: 28641687
Ca1_Block_32	1	31477002-31483584	Ca1: 31477002,Ca1: 31483584
Ca1_Block_33	1	32174446-32174469	Ca1: 32174446,Ca1: 32174469
Ca1_Block_34	1	32266870-32283939	Ca1: 32266870,Ca1: 32283939
Ca1_Block_35	1	34314586-34743188	Ca1: 34314586,Ca1: 34395064,Ca1: 34713825,Ca1: 34743188
Ca1_Block_36	1	34754575-34754596	Ca1: 34754575,Ca1: 34754596
Ca1_Block_37	1	34865652-35356038	Ca1: 34865652,Ca1: 35073977,Ca1: 35148190,Ca1: 35152714,Ca1: 35182846,Ca1: 35182917,Ca1: 35182918,Ca1: 35182925,Ca1: 35261112,Ca1: 35302634,Ca1: 35311476,Ca1: 35311482,Ca1: 35356038
Ca1_Block_38	1	37869964-38351224	Ca1: 37869964,Ca1: 37888979,Ca1: 38133629,Ca1: 38295617,Ca1: 38295618,Ca1: 38296366,Ca1: 38296393,Ca1: 38310073,Ca1: 38335192,Ca1: 38351224
Ca1_Block_39	1	38549041-38922535	Ca1: 38549041,Ca1: 38562136,Ca1: 38562173,Ca1: 38562281,Ca1: 38884526,Ca1: 38922535
Ca1_Block_40	1	39585420-40080101	Ca1: 39585420,Ca1: 39586706,Ca1: 39739919,Ca1: 39814892,Ca1: 39950057,Ca1: 40016521,Ca1: 40079749,Ca1: 40080075,Ca1: 40080101
Ca2_Block_1	2	2705071-2787526	Ca2: 2705071,Ca2: 2710291,Ca2: 2720749,Ca2: 2762117,Ca2: 2787526
Ca2_Block_2	2	2792576-3032719	Ca2: 2792576,Ca2: 2834214,Ca2: 2834253,Ca2: 2838505,Ca2: 3005300,Ca2: 3032719
Ca2_Block_3	2	7714392-7893021	Ca2: 7714392,Ca2: 7752675,Ca2: 7753419,Ca2: 7753425,Ca2: 7753440,Ca2: 7893021
Ca2_Block_4	2	7918355-7926702	Ca2: 7918355,Ca2: 7926666,Ca2: 7926702
Ca2_Block_5	2	30374790-30374824	Ca2: 30374790,Ca2: 30374791,Ca2: 30374824
Ca2_Block_6	2	30553736-30574820	Ca2: 30553736,Ca2: 30574765,Ca2: 30574820
Ca2_Block_7	2	30903822-30917366	Ca2: 30903822,Ca2: 30910547,Ca2: 30917353,Ca2: 30917366
Ca2_Block_8	2	30951694-31139251	Ca2: 30951694,Ca2: 30951724,Ca2: 30952417,Ca2: 30954617,Ca2: 31032485,Ca2: 31032543,Ca2: 31049474,Ca2: 31049484,Ca2: 31058220,Ca2: 31073108,Ca2: 31081323,Ca2: 31139246,Ca2: 31139251
Ca2_Block_9	2	31203154-31681999	Ca2: 31203154,Ca2: 31235335,Ca2: 31248426,Ca2: 31421156,Ca2: 31421324,Ca2: 31643643,Ca2: 31681999
Ca2_Block_10	2	31810778-31856172	Ca2: 31810778,Ca2: 31810785,Ca2: 31810803,Ca2: 31823265,Ca2: 31856172
Ca2_Block_11	2	32102651-32110068	Ca2: 32102651,Ca2: 32110068
Ca2_Block_12	2	32142844-32154998	Ca2: 32142844,Ca2: 32154998
Ca2_Block_13	2	32158163-32158200	Ca2: 32158163,Ca2: 32158200
Ca2_Block_14	2	32423784-32423816	Ca2: 32423784,Ca2: 32423816
Ca2_Block_15	2	33604807-33655059	Ca2: 33604807,Ca2: 33648677,Ca2: 33652746,Ca2: 33654975,Ca2: 33655059
Ca2_Block_16	2	34339228-34339476	Ca2: 34339228,Ca2: 34339296,Ca2: 34339304,Ca2: 34339472,Ca2: 34339476
Ca2_Block_17	2	35064514-35064519	Ca2: 35064514,Ca2: 35064519
Ca2_Block_18	2	35187617-35427141	Ca2: 35187617,Ca2: 35189750,Ca2: 35347613,Ca2: 35352028,Ca2: 35357922,Ca2: 35384178,Ca2: 35427141
Ca2_Block_19	2	35465603-35465636	Ca2: 35465603,Ca2: 35465625,Ca2: 35465636
Ca2_Block_20	2	35570366-35594535	Ca2: 35570366,Ca2: 35586082,Ca2: 35594485,Ca2: 35594532,Ca2: 35594535
Ca2_Block_21	2	35594675-35756031	Ca2: 35594675,Ca2: 35594685,Ca2: 35594689,Ca2: 35599059,Ca2: 35677819,Ca2: 35677861,Ca2: 35718169,Ca2: 35742640,Ca2: 35751227,Ca2: 35756031
Ca2_Block_22	2	35901139-35901182	Ca2: 35901139,Ca2: 35901182
Ca2_Block_23	2	36008104-36068304	Ca2: 36008104,Ca2: 36032263,Ca2: 36037159,Ca2: 36037185,Ca2: 36068289,Ca2: 36068304
Ca3_Block_1	3	8665431-8852493	Ca3: 8665431,Ca3: 8665435,Ca3: 8834773,Ca3: 8834777,Ca3: 8852493
Ca3_Block_2	3	13856108-14182440	Ca3: 13856108,Ca3: 14017071,Ca3: 14042580,Ca3: 14074164,Ca3: 14083051,Ca3: 14174828,Ca3: 14174865,Ca3: 14174872,Ca3: 14182413,Ca3: 14182435,Ca3: 14182440
Ca3_Block_3	3	18229903-18404625	Ca3: 18229903,Ca3: 18234844,Ca3: 18259381,Ca3: 18264307,Ca3: 18264311,Ca3: 18404625
Ca3_Block_4	3	29665307-29909008	Ca3: 29665307,Ca3: 29675511,Ca3: 29679459,Ca3: 29684330,Ca3: 29684369,Ca3: 29803143,Ca3: 29803207,Ca3: 29807248,Ca3: 29835051,Ca3: 29835057,Ca3: 29868714,Ca3: 29872796,Ca3: 29908981,Ca3: 29908982,Ca3: 29909008
Ca3_Block_5	3	29909956-29909989	Ca3: 29909956,Ca3: 29909989
Ca3_Block_6	3	29997145-30078108	Ca3: 29997145,Ca3: 30038144,Ca3: 30041913,Ca3: 30041977,Ca3: 30078108
Ca3_Block_7	3	31313021-31610758	Ca3: 31313021,Ca3: 31314787,Ca3: 31344462,Ca3: 31355528,Ca3: 31355570,Ca3: 31358137,Ca3: 31370305,Ca3: 31423265,Ca3: 31469668,Ca3: 31488241,Ca3: 31509082,Ca3: 31520967,Ca3: 31532622,Ca3: 31532701,Ca3: 31566933,Ca3: 31566949,Ca3: 31570848,Ca3: 31603422,Ca3: 31603426,Ca3: 31608411,Ca3: 31608463,Ca3: 31610758
Ca3_Block_8	3	31624671-31624682	Ca3: 31624671,Ca3: 31624682
Ca3_Block_9	3	33876202-33883758	Ca3: 33876202,Ca3: 33883758
Ca3_Block_10	3	35971296-35977717	Ca3: 35971296,Ca3: 35977717
Ca3_Block_11	3	36018140-36132729	Ca3: 36018140,Ca3: 36018152,Ca3: 36060694,Ca3: 36060743,Ca3: 36113527,Ca3: 36114817,Ca3: 36121691,Ca3: 36132729
Ca3_Block_12	3	36252255-36252256	Ca3: 36252255,Ca3: 36252256
Ca3_Block_13	3	36267769-36269671	Ca3: 36267769,Ca3: 36269671
Ca3_Block_14	3	36361339-36449769	Ca3: 36361339,Ca3: 36361380,Ca3: 36361395,Ca3: 36366551,Ca3: 36379946,Ca3: 36379969,Ca3: 36407687,Ca3: 36449769
Ca3_Block_15	3	36766357-36799204	Ca3: 36766357,Ca3: 36772002,Ca3: 36783494,Ca3: 36799176,Ca3: 36799204
Ca3_Block_16	3	36872616-37143743	Ca3: 36872616,Ca3: 36872891,Ca3: 36876334,Ca3: 36876361,Ca3: 36894852,Ca3: 36895362,Ca3: 36895461,Ca3: 36913219,Ca3: 36913289,Ca3: 36917594,Ca3: 36917596,Ca3: 36996045,Ca3: 37062123,Ca3: 37143743
Ca3_Block_17	3	37966174-38164627	Ca3: 37966174,Ca3: 38027888,Ca3: 38031623,Ca3: 38070736,Ca3: 38076796,Ca3: 38081386,Ca3: 38137506,Ca3: 38162642,Ca3: 38164627
Ca4_Block_1	4	3235996-3332442	Ca4: 3235996,Ca4: 3256614,Ca4: 3274504,Ca4: 3293782,Ca4: 3293817,Ca4: 3302269,Ca4: 3321613,Ca4: 3321643,Ca4: 3321659,Ca4: 3332442
Ca4_Block_2	4	3381983-3381999	Ca4: 3381983,Ca4: 3381999
Ca4_Block_3	4	4118267-4128856	Ca4: 4118267,Ca4: 4128849,Ca4: 4128856
Ca4_Block_4	4	4251864-4605719	Ca4: 4251864,Ca4: 4306942,Ca4: 4306943,Ca4: 4318296,Ca4: 4332564,Ca4: 4332603,Ca4: 4333836,Ca4: 4396218,Ca4: 4396253,Ca4: 4407288,Ca4: 4429522,Ca4: 4469962,Ca4: 4474241,Ca4: 4495129,Ca4: 4544474,Ca4: 4558411,Ca4: 4605690,Ca4: 4605719
Ca4_Block_5	4	4629282-5073317	Ca4: 4629282,Ca4: 4629355,Ca4: 4679255,Ca4: 4680728,Ca4: 4724931,Ca4: 4757846,Ca4: 4796209,Ca4: 4807816,Ca4: 5073317
Ca4_Block_6	4	7268780-7367645	Ca4: 7268780,Ca4: 7280380,Ca4: 7310206,Ca4: 7344984,Ca4: 7349180,Ca4: 7367645
Ca4_Block_7	4	8330934-8656398	Ca4: 8330934,Ca4: 8399356,Ca4: 8430016,Ca4: 8468991,Ca4: 8471174,Ca4: 8471177,Ca4: 8473120,Ca4: 8473127,Ca4: 8479467,Ca4: 8479518,Ca4: 8479545,Ca4: 8523488,Ca4: 8656398
Ca4_Block_8	4	8667102-8805803	Ca4: 8667102,Ca4: 8667109,Ca4: 8667121,Ca4: 8667126,Ca4: 8699718,Ca4: 8717255,Ca4: 8742518,Ca4: 8753091,Ca4: 8755622,Ca4: 8805782,Ca4: 8805803
Ca4_Block_9	4	10873308-11091578	Ca4: 10873308,Ca4: 10873315,Ca4: 10904097,Ca4: 10904128,Ca4: 10931701,Ca4: 11055026,Ca4: 11055030,Ca4: 11065182,Ca4: 11091578
Ca4_Block_10	4	11121421-11121454	Ca4: 11121421,Ca4: 11121454
Ca4_Block_11	4	11243197-11517999	Ca4: 11243197,Ca4: 11253989,Ca4: 11297279,Ca4: 11325048,Ca4: 11396052,Ca4: 11415266,Ca4: 11437261,Ca4: 11465636,Ca4: 11489965,Ca4: 11517999
Ca4_Block_12	4	11577833-12075322	Ca4: 11577833,Ca4: 11632342,Ca4: 11635766,Ca4: 11635776,Ca4: 11695790,Ca4: 11698719,Ca4: 11699244,Ca4: 11699275,Ca4: 11700153,Ca4: 11763248,Ca4: 12075322
Ca4_Block_13	4	12461415-12690077	Ca4: 12461415,Ca4: 12484911,Ca4: 12499471,Ca4: 12553061,Ca4: 12559654,Ca4: 12576388,Ca4: 12596770,Ca4: 12596793,Ca4: 12690077
Ca4_Block_14	4	13593426-13821063	Ca4: 13593426,Ca4: 13593553,Ca4: 13637982,Ca4: 13685998,Ca4: 13717261,Ca4: 13749710,Ca4: 13749741,Ca4: 13769052,Ca4: 13818280,Ca4: 13821063
Ca4_Block_15	4	14023652-14180446	Ca4: 14023652,Ca4: 14057570,Ca4: 14059637,Ca4: 14059870,Ca4: 14088932,Ca4: 14094039,Ca4: 14094079,Ca4: 14112123,Ca4: 14135604,Ca4: 14180446
Ca4_Block_16	4	14865246-14865247	Ca4: 14865246,Ca4: 14865247
Ca4_Block_17	4	15409196-15448333	Ca4: 15409196,Ca4: 15409212,Ca4: 15418625,Ca4: 15418632,Ca4: 15446877,Ca4: 15448333
Ca4_Block_18	4	15547293-15790835	Ca4: 15547293,Ca4: 15552818,Ca4: 15608950,Ca4: 15612712,Ca4: 15615765,Ca4: 15664827,Ca4: 15703929,Ca4: 15714476,Ca4: 15714525,Ca4: 15725312,Ca4: 15735041,Ca4: 15752294,Ca4: 15773237,Ca4: 15790835
Ca4_Block_19	4	16284657-16299510	Ca4: 16284657,Ca4: 16299510
Ca4_Block_20	4	16988596-16988626	Ca4: 16988596,Ca4: 16988626
Ca4_Block_21	4	17429699-17429747	Ca4: 17429699,Ca4: 17429735,Ca4: 17429742,Ca4: 17429747
Ca4_Block_22	4	17440813-17440866	Ca4: 17440813,Ca4: 17440860,Ca4: 17440865,Ca4: 17440866
Ca4_Block_23	4	17481178-17854727	Ca4: 17481178,Ca4: 17490696,Ca4: 17529562,Ca4: 17663691,Ca4: 17677429,Ca4: 17677474,Ca4: 17683170,Ca4: 17690898,Ca4: 17702565,Ca4: 17764377,Ca4: 17829807,Ca4: 17854162,Ca4: 17854262,Ca4: 17854727
Ca4_Block_24	4	19789345-19789350	Ca4: 19789345,Ca4: 19789350
Ca4_Block_25	4	22696292-23122042	Ca4: 22696292,Ca4: 22743247,Ca4: 22760219,Ca4: 22760269,Ca4: 22801260,Ca4: 22818105,Ca4: 22821202,Ca4: 22863812,Ca4: 22863813,Ca4: 22897531,Ca4: 22907639,Ca4: 22918539,Ca4: 22927910,Ca4: 22950293,Ca4: 22956729,Ca4: 22959956,Ca4: 22984274,Ca4: 23027175,Ca4: 23033216,Ca4: 23033223,Ca4: 23044820,Ca4: 23044850,Ca4: 23047130,Ca4: 23047162,Ca4: 23047199,Ca4: 23049531,Ca4: 23064524,Ca4: 23064528,Ca4: 23…
Ca4_Block_26	4	25394627-25773761	Ca4: 25394627,Ca4: 25394657,Ca4: 25394658,Ca4: 25461812,Ca4: 25472778,Ca4: 25773761
Ca4_Block_27	4	26001192-26120154	Ca4: 26001192,Ca4: 26014099,Ca4: 26014102,Ca4: 26120154
Ca4_Block_28	4	27377850-27859898	Ca4: 27377850,Ca4: 27401555,Ca4: 27626672,Ca4: 27664476,Ca4: 27809456,Ca4: 27859895,Ca4: 27859898
Ca4_Block_29	4	27919911-28282208	Ca4: 27919911,Ca4: 28018502,Ca4: 28018528,Ca4: 28018541,Ca4: 28145141,Ca4: 28145170,Ca4: 28182532,Ca4: 28182534,Ca4: 28282208
Ca4_Block_30	4	28549121-29033909	Ca4: 28549121,Ca4: 28584312,Ca4: 28857438,Ca4: 28857478,Ca4: 28939079,Ca4: 28990881,Ca4: 29011930,Ca4: 29011947,Ca4: 29011956,Ca4: 29011962,Ca4: 29011965,Ca4: 29033889,Ca4: 29033909
Ca4_Block_31	4	29049436-29135119	Ca4: 29049436,Ca4: 29092572,Ca4: 29092608,Ca4: 29092609,Ca4: 29135094,Ca4: 29135096,Ca4: 29135119
Ca4_Block_32	4	29175618-29307236	Ca4: 29175618,Ca4: 29269004,Ca4: 29269161,Ca4: 29281022,Ca4: 29307236
Ca4_Block_33	4	29323218-29822983	Ca4: 29323218,Ca4: 29323233,Ca4: 29325458,Ca4: 29357680,Ca4: 29382030,Ca4: 29386184,Ca4: 29593548,Ca4: 29625418,Ca4: 29625419,Ca4: 29625433,Ca4: 29625492,Ca4: 29682569,Ca4: 29704177,Ca4: 29715329,Ca4: 29822983
Ca4_Block_34	4	29824473-29921903	Ca4: 29824473,Ca4: 29824605,Ca4: 29865505,Ca4: 29865559,Ca4: 29872986,Ca4: 29906826,Ca4: 29915233,Ca4: 29915235,Ca4: 29921878,Ca4: 29921884,Ca4: 29921889,Ca4: 29921903
Ca4_Block_35	4	29975567-30473260	Ca4: 29975567,Ca4: 29985381,Ca4: 30010695,Ca4: 30010700,Ca4: 30010703,Ca4: 30010744,Ca4: 30051307,Ca4: 30098153,Ca4: 30100120,Ca4: 30138520,Ca4: 30138554,Ca4: 30145720,Ca4: 30151414,Ca4: 30151416,Ca4: 30202575,Ca4: 30203172,Ca4: 30203202,Ca4: 30203216,Ca4: 30228263,Ca4: 30228280,Ca4: 30233037,Ca4: 30233064,Ca4: 30268888,Ca4: 30273990,Ca4: 30273992,Ca4: 30274000,Ca4: 30277069,Ca4: 30296546,Ca4: 30…
Ca4_Block_36	4	30607860-30715042	Ca4: 30607860,Ca4: 30608189,Ca4: 30692236,Ca4: 30707253,Ca4: 30715006,Ca4: 30715042
Ca4_Block_37	4	30869364-31328672	Ca4: 30869364,Ca4: 30869382,Ca4: 30869384,Ca4: 30869396,Ca4: 30948593,Ca4: 30999387,Ca4: 31025625,Ca4: 31027784,Ca4: 31114886,Ca4: 31140379,Ca4: 31295098,Ca4: 31307710,Ca4: 31310655,Ca4: 31310675,Ca4: 31321459,Ca4: 31328672
Ca4_Block_38	4	31334177-31825381	Ca4: 31334177,Ca4: 31334235,Ca4: 31351092,Ca4: 31737913,Ca4: 31825381
Ca4_Block_39	4	31965561-31965571	Ca4: 31965561,Ca4: 31965571
Ca4_Block_40	4	31979175-32421629	Ca4: 31979175,Ca4: 31979222,Ca4: 31979798,Ca4: 31979828,Ca4: 32172903,Ca4: 32183527,Ca4: 32183528,Ca4: 32212451,Ca4: 32243892,Ca4: 32252298,Ca4: 32301542,Ca4: 32301560,Ca4: 32378080,Ca4: 32400377,Ca4: 32403613,Ca4: 32403651,Ca4: 32421629
Ca4_Block_41	4	32551489-32551521	Ca4: 32551489,Ca4: 32551521
Ca4_Block_42	4	32604313-32604538	Ca4: 32604313,Ca4: 32604538
Ca4_Block_43	4	32819412-33316298	Ca4: 32819412,Ca4: 32819413,Ca4: 32827742,Ca4: 32996958,Ca4: 33059495,Ca4: 33316298
Ca4_Block_44	4	33853792-33853821	Ca4: 33853792,Ca4: 33853821
Ca4_Block_45	4	34814448-34814454	Ca4: 34814448,Ca4: 34814454
Ca4_Block_46	4	35005146-35437325	Ca4: 35005146,Ca4: 35301804,Ca4: 35385844,Ca4: 35437325
Ca4_Block_47	4	35581657-35675291	Ca4: 35581657,Ca4: 35582790,Ca4: 35583396,Ca4: 35590672,Ca4: 35675291
Ca4_Block_48	4	36486344-36753655	Ca4: 36486344,Ca4: 36516341,Ca4: 36516363,Ca4: 36566962,Ca4: 36600066,Ca4: 36600114,Ca4: 36718633,Ca4: 36753655
Ca4_Block_49	4	36759142-36759160	Ca4: 36759142,Ca4: 36759151,Ca4: 36759160
Ca4_Block_50	4	36759161-36813406	Ca4: 36759161,Ca4: 36759177,Ca4: 36803722,Ca4: 36804548,Ca4: 36812293,Ca4: 36812332,Ca4: 36812352,Ca4: 36812360,Ca4: 36813406
Ca4_Block_51	4	36925687-37008963	Ca4: 36925687,Ca4: 36928724,Ca4: 36951922,Ca4: 36951942,Ca4: 36953726,Ca4: 36953728,Ca4: 37008963,
Ca4_Block_52	4	37009044-37009047	Ca4: 37009044,Ca4: 37009047
Ca4_Block_53	4	37009062-37011947	Ca4: 37009062,Ca4: 37009628,Ca4: 37009641,Ca4: 37009665,Ca4: 37011947,
Ca4_Block_54	4	37188483-37420096	Ca4: 37188483,Ca4: 37224072,Ca4: 37224090,Ca4: 37229598,Ca4: 37300412,Ca4: 37300518,Ca4: 37341170,Ca4: 37341226,Ca4: 37351109,Ca4: 37420076,Ca4: 37420090,Ca4: 37420096
Ca4_Block_55	4	37420097-37420162	Ca4: 37420097,Ca4: 37420162
Ca4_Block_56	4	37578196-37901750	Ca4: 37578196,Ca4: 37618142,Ca4: 37634286,Ca4: 37634347,Ca4: 37679463,Ca4: 37685842,Ca4: 37699981,Ca4: 37720860,Ca4: 37772821,Ca4: 37773277,Ca4: 37773278,Ca4: 37797231,Ca4: 37805026,Ca4: 37813213,Ca4: 37824651,Ca4: 37849810,Ca4: 37852266,Ca4: 37852272,Ca4: 37852284,Ca4: 37852321,Ca4: 37852323,Ca4: 37901750
Ca4_Block_57	4	37901751-38008254	Ca4: 37901751,Ca4: 37990248,Ca4: 38008205,Ca4: 38008227,Ca4: 38008254
Ca4_Block_58	4	38186887-38203260	Ca4: 38186887,Ca4: 38203260
Ca4_Block_59	4	38233497-38298356	Ca4: 38233497,Ca4: 38233536,Ca4: 38289052,Ca4: 38289066,Ca4: 38290817,Ca4: 38290832,Ca4: 38298356
Ca4_Block_60	4	38301780-38501343	Ca4: 38301780,Ca4: 38306394,Ca4: 38341230,Ca4: 38361913,Ca4: 38426254,Ca4: 38501343
Ca4_Block_61	4	38554317-38581016	Ca4: 38554317,Ca4: 38580546,Ca4: 38580554,Ca4: 38580586,Ca4: 38581016
Ca4_Block_62	4	38581192-38625309	Ca4: 38581192,Ca4: 38591285,Ca4: 38594149,Ca4: 38594173,Ca4: 38619056,Ca4: 38625309
Ca4_Block_63	4	38625368-38976785	Ca4: 38625368,Ca4: 38687034,Ca4: 38688610,Ca4: 38726564,Ca4: 38735232,Ca4: 38735234,Ca4: 38760498,Ca4: 38770582,Ca4: 38785205,Ca4: 38832632,Ca4: 38832636,Ca4: 38844815,Ca4: 38844816,Ca4: 38846435,Ca4: 38846476,Ca4: 38887022,Ca4: 38887996,Ca4: 38888005,Ca4: 38896258,Ca4: 38976785
Ca4_Block_64	4	38976822-38976836	Ca4: 38976822,Ca4: 38976835,Ca4: 38976836
Ca4_Block_65	4	39035947-39049036	Ca4: 39035947,Ca4: 39049036
Ca4_Block_66	4	39080797-39183647	Ca4: 39080797,Ca4: 39080835,Ca4: 39091734,Ca4: 39091735,Ca4: 39091736,Ca4: 39149491,Ca4: 39151383,Ca4: 39162941,Ca4: 39181724,Ca4: 39183634,Ca4: 39183647
Ca4_Block_67	4	39305010-39787174	Ca4: 39305010,Ca4: 39316404,Ca4: 39333428,Ca4: 39333432,Ca4: 39333437,Ca4: 39333439,Ca4: 39706384,Ca4: 39713388,Ca4: 39746549,Ca4: 39746569,Ca4: 39746573,Ca4: 39769849,Ca4: 39780626,Ca4: 39787174
Ca4_Block_68	4	39835873-40081267	Ca4: 39835873,Ca4: 39934540,Ca4: 39936124,Ca4: 39936162,Ca4: 39942339,Ca4: 39942402,Ca4: 40081257,Ca4: 40081267
Ca4_Block_69	4	40135710-40466932	Ca4: 40135710,Ca4: 40147289,Ca4: 40158139,Ca4: 40214018,Ca4: 40224991,Ca4: 40255718,Ca4: 40255727,Ca4: 40255731,Ca4: 40272317,Ca4: 40278638,Ca4: 40358767,Ca4: 40358804,Ca4: 40372919,Ca4: 40373450,Ca4: 40379926,Ca4: 40389653,Ca4: 40389748,Ca4: 40395188,Ca4: 40400518,Ca4: 40432960,Ca4: 40466922,Ca4: 40466932
Ca4_Block_70	4	40492358-40590714	Ca4: 40492358,Ca4: 40492382,Ca4: 40557416,Ca4: 40590591,Ca4: 40590703,Ca4: 40590714
Ca4_Block_71	4	40757508-41159604	Ca4: 40757508,Ca4: 40784256,Ca4: 40896965,Ca4: 40918768,Ca4: 40964173,Ca4: 40964189,Ca4: 40967969,Ca4: 40999191,Ca4: 41013124,Ca4: 41020331,Ca4: 41020377,Ca4: 41027407,Ca4: 41027413,Ca4: 41038977,Ca4: 41045113,Ca4: 41086612,Ca4: 41107171,Ca4: 41159604
Ca4_Block_72	4	44381094-44381126	Ca4: 44381094,Ca4: 44381112,Ca4: 44381126
Ca4_Block_73	4	44401197-44611219	Ca4: 44401197,Ca4: 44401201,Ca4: 44422051,Ca4: 44611199,Ca4: 44611219
Ca4_Block_74	4	44721695-45135959	Ca4: 44721695,Ca4: 44771644,Ca4: 44785477,Ca4: 44791046,Ca4: 44798862,Ca4: 44855920,Ca4: 44855968,Ca4: 44905844,Ca4: 44905869,Ca4: 44907698,Ca4: 44911631,Ca4: 44917890,Ca4: 44925887,Ca4: 44932723,Ca4: 44945463,Ca4: 44948051,Ca4: 44948067,Ca4: 45109519,Ca4: 45111471,Ca4: 45135959
Ca4_Block_75	4	46717508-47215153	Ca4: 46717508,Ca4: 46731155,Ca4: 46771776,Ca4: 47190428,Ca4: 47209220,Ca4: 47215125,Ca4: 47215127,Ca4: 47215153
Ca4_Block_76	4	48295665-48310984	Ca4: 48295665,Ca4: 48310984
Ca4_Block_77	4	48503935-48519187	Ca4: 48503935,Ca4: 48519187
Ca5_Block_1	5	189834-208087	Ca5: 189834,Ca5: 208045,Ca5: 208087
Ca5_Block_2	5	28040344-28047653	Ca5: 28040344,Ca5: 28042628,Ca5: 28047653
Ca5_Block_3	5	28095266-28186627	Ca5: 28095266,Ca5: 28120000,Ca5: 28120049,Ca5: 28186627
Ca5_Block_4	5	28469224-28864293	Ca5: 28469224,Ca5: 28592657,Ca5: 28720454,Ca5: 28720484,Ca5: 28729559,Ca5: 28729580,Ca5: 28800614,Ca5: 28831576,Ca5: 28864225,Ca5: 28864291,Ca5: 28864293
Ca5_Block_5	5	28873622-28873665	Ca5: 28873622,Ca5: 28873645,Ca5: 28873665
Ca5_Block_6	5	38152360-38153552	Ca5: 38152360,Ca5: 38153552
Ca5_Block_7	5	44533335-44880148	Ca5: 44533335,Ca5: 44545076,Ca5: 44572156,Ca5: 44575414,Ca5: 44673852,Ca5: 44751800,Ca5: 44760946,Ca5: 44765816,Ca5: 44765828,Ca5: 44822116,Ca5: 44822119,Ca5: 44823759,Ca5: 44878800,Ca5: 44880148
Ca6_Block_1	6	1841806-1849005	Ca6: 1841806,Ca6: 1841818,Ca6: 1849005
Ca6_Block_2	6	1886917-2183277	Ca6: 1886917,Ca6: 1893420,Ca6: 1893470,Ca6: 1894462,Ca6: 1991541,Ca6: 2009467,Ca6: 2032632,Ca6: 2105286,Ca6: 2106542,Ca6: 2137352,Ca6: 2150024,Ca6: 2183277
Ca6_Block_3	6	2541669-3024335	Ca6: 2541669,Ca6: 2593263,Ca6: 2611619,Ca6: 2699254,Ca6: 2702698,Ca6: 2814827,Ca6: 2837419,Ca6: 2908823,Ca6: 2944085,Ca6: 2971959,Ca6: 3018220,Ca6: 3024192,Ca6: 3024334,Ca6: 3024335
Ca6_Block_4	6	7700194-7983663	Ca6: 7700194,Ca6: 7727898,Ca6: 7806456,Ca6: 7815266,Ca6: 7815267,Ca6: 7817272,Ca6: 7819348,Ca6: 7825921,Ca6: 7825978,Ca6: 7872977,Ca6: 7872984,Ca6: 7879787,Ca6: 7880602,Ca6: 7895806,Ca6: 7909290,Ca6: 7917306,Ca6: 7917326,Ca6: 7917334,Ca6: 7927665,Ca6: 7927681,Ca6: 7927708,Ca6: 7943546,Ca6: 7943558,Ca6: 7943621,Ca6: 7983644,Ca6: 7983663
Ca6_Block_5	6	8030248-8096871	Ca6: 8030248,Ca6: 8080857,Ca6: 8080860,Ca6: 8089606,Ca6: 8089824,Ca6: 8096871
Ca6_Block_6	6	9766736-9766746	Ca6: 9766736,Ca6: 9766746
Ca6_Block_7	6	9847419-9847422	Ca6: 9847419,Ca6: 9847422
Ca6_Block_8	6	9941629-9941649	Ca6: 9941629,Ca6: 9941649
Ca6_Block_9	6	10039154-10322362	Ca6: 10039154,Ca6: 10167314,Ca6: 10173505,Ca6: 10173534,Ca6: 10173555,Ca6: 10173558,Ca6: 10206920,Ca6: 10320161,Ca6: 10322362
Ca6_Block_10	6	10362380-10847192	Ca6: 10362380,Ca6: 10366163,Ca6: 10396045,Ca6: 10428841,Ca6: 10510492,Ca6: 10592107,Ca6: 10592170,Ca6: 10613546,Ca6: 10627082,Ca6: 10698604,Ca6: 10728455,Ca6: 10769008,Ca6: 10847192
Ca6_Block_11	6	10898890-10900225	Ca6: 10898890,Ca6: 10898897,Ca6: 10900225,
Ca6_Block_12	6	11106014-11181031	Ca6: 11106014,Ca6: 11106054,Ca6: 11126059,Ca6: 11137607,Ca6: 11167317,Ca6: 11181031
Ca6_Block_13	6	11601270-11737222	Ca6: 11601270,Ca6: 11601288,Ca6: 11658375,Ca6: 11673053,Ca6: 11690243,Ca6: 11737222
Ca6_Block_14	6	12976211-12976214	Ca6: 12976211,Ca6: 12976214
Ca6_Block_15	6	12978716-12978733	Ca6: 12978716,Ca6: 12978733
Ca6_Block_16	6	13399573-13831574	Ca6: 13399573,Ca6: 13399594,Ca6: 13402865,Ca6: 13402884,Ca6: 13402920,Ca6: 13643158,Ca6: 13666171,Ca6: 13831574
Ca6_Block_17	6	14373490-14714786	Ca6: 14373490,Ca6: 14376222,Ca6: 14406939,Ca6: 14406977,Ca6: 14407227,Ca6: 14407232,Ca6: 14424619,Ca6: 14476521,Ca6: 14528916,Ca6: 14535344,Ca6: 14569027,Ca6: 14574171,Ca6: 14590770,Ca6: 14592230,Ca6: 14608687,Ca6: 14714786
Ca6_Block_18	6	21802305-21802325	Ca6: 21802305,Ca6: 21802318,Ca6: 21802325
Ca6_Block_19	6	26457574-26457601	Ca6: 26457574,Ca6: 26457601
Ca6_Block_20	6	26534881-26534883	Ca6: 26534881,Ca6: 26534883
Ca6_Block_21	6	38701935-38701971	Ca6: 38701935,Ca6: 38701971
Ca6_Block_22	6	56573710-56573713	Ca6: 56573710,Ca6: 56573713
Ca6_Block_23	6	57654350-57654369	Ca6: 57654350,Ca6: 57654369
Ca6_Block_24	6	57707426-57707441	Ca6: 57707426,Ca6: 57707441
Ca6_Block_25	6	57708760-57722953	Ca6: 57708760,Ca6: 57722953
Ca6_Block_26	6	57932424-57940068	Ca6: 57932424,Ca6: 57940068
Ca6_Block_27	6	58006159-58008759	Ca6: 58006159,Ca6: 58008759
Ca6_Block_28	6	58100441-58142853	Ca6: 58100441,Ca6: 58100449,Ca6: 58103358,Ca6: 58107026,Ca6: 58107041,Ca6: 58138157,Ca6: 58142804,Ca6: 58142828,Ca6: 58142853
Ca6_Block_29	6	59084865-59266750	Ca6: 59084865,Ca6: 59115549,Ca6: 59157905,Ca6: 59158167,Ca6: 59191493,Ca6: 59191497,Ca6: 59217199,Ca6: 59231462,Ca6: 59266750
Ca7_Block_1	7	3458856-3655225	Ca7: 3458856,Ca7: 3509967,Ca7: 3509969,Ca7: 3524762,Ca7: 3561351,Ca7: 3573998,Ca7: 3575669,Ca7: 3593837,Ca7: 3600987,Ca7: 3629987,Ca7: 3630219,Ca7: 3635762,Ca7: 3655202,Ca7: 3655225
Ca7_Block_2	7	5548887-5548892	Ca7: 5548887,Ca7: 5548892
Ca7_Block_3	7	5548905-5559110	Ca7: 5548905,Ca7: 5559110
Ca7_Block_4	7	5692148-6040924	Ca7: 5692148,Ca7: 5713007,Ca7: 5728003,Ca7: 5782360,Ca7: 5782593,Ca7: 5811673,Ca7: 5881027,Ca7: 5908726,Ca7: 6031161,Ca7: 6031181,Ca7: 6031187,Ca7: 6037614,Ca7: 6038010,Ca7: 6040910,Ca7: 6040924
Ca7_Block_5	7	6045262-6544932	Ca7: 6045262,Ca7: 6045273,Ca7: 6050307,Ca7: 6062104,Ca7: 6080276,Ca7: 6324745,Ca7: 6544920,Ca7: 6544932
Ca7_Block_6	7	20285563-20293736	Ca7: 20285563,Ca7: 20293736
Ca7_Block_7	7	20527694-20610738	Ca7: 20527694,Ca7: 20545630,Ca7: 20555103,Ca7: 20610728,Ca7: 20610732,Ca7: 20610738
Ca7_Block_8	7	26492619-26774803	Ca7: 26492619,Ca7: 26612242,Ca7: 26769167,Ca7: 26774803
Ca7_Block_9	7	29753839-30089579	Ca7: 29753839,Ca7: 30041149,Ca7: 30041164,Ca7: 30089514,Ca7: 30089515,Ca7: 30089569,Ca7: 30089579
Ca7_Block_10	7	31193917-31203988	Ca7: 31193917,Ca7: 31203988
Ca7_Block_11	7	32170699-32375957	Ca7: 32170699,Ca7: 32170702,Ca7: 32238730,Ca7: 32251654,Ca7: 32251681,Ca7: 32251689,Ca7: 32286274,Ca7: 32305663,Ca7: 32375957
Ca7_Block_12	7	32401115-32894822	Ca7: 32401115,Ca7: 32482435,Ca7: 32678008,Ca7: 32749345,Ca7: 32749374,Ca7: 32810920,Ca7: 32871146,Ca7: 32894822
Ca7_Block_13	7	33024946-33042729	Ca7: 33024946,Ca7: 33042729
Ca7_Block_14	7	33256312-33256360	Ca7: 33256312,Ca7: 33256360
Ca7_Block_15	7	33369928-33369962	Ca7: 33369928,Ca7: 33369962
Ca7_Block_16	7	33558589-33796835	Ca7: 33558589,Ca7: 33704600,Ca7: 33725695,Ca7: 33725696,Ca7: 33796835
Ca7_Block_17	7	33822239-34219315	Ca7: 33822239,Ca7: 34135750,Ca7: 34175881,Ca7: 34175928,Ca7: 34181376,Ca7: 34209989,Ca7: 34219315
Ca7_Block_18	7	35172009-35172023	Ca7: 35172009,Ca7: 35172023
Ca7_Block_19	7	35249582-35731203	Ca7: 35249582,Ca7: 35255674,Ca7: 35255676,Ca7: 35255679,Ca7: 35282831,Ca7: 35514737,Ca7: 35731203
Ca8_Block_1	8	619780-619929	Ca8: 619780,Ca8: 619923,Ca8: 619925,Ca8: 619928,Ca8: 619929
Ca8_Block_2	8	619959-620018	Ca8: 619959,Ca8: 620018
Ca8_Block_3	8	620365-766069	Ca8: 620365,Ca8: 628958,Ca8: 667210,Ca8: 667227,Ca8: 692206,Ca8: 692223,Ca8: 693722,Ca8: 766069
Ca8_Block_4	8	8837143-8858449	Ca8: 8837143,Ca8: 8837145,Ca8: 8854375,Ca8: 8855895,Ca8: 8858378,Ca8: 8858417,Ca8: 8858449
Ca8_Block_5	8	9087442-9098790	Ca8: 9087442,Ca8: 9098790
Ca8_Block_6	8	9156650-9213312	Ca8: 9156650,Ca8: 9156656,Ca8: 9156658,Ca8: 9156798,Ca8: 9169062,Ca8: 9213247,Ca8: 9213251,Ca8: 9213272,Ca8: 9213301,Ca8: 9213312
Ca8_Block_7	8	11251550-11659801	Ca8: 11251550,Ca8: 11383858,Ca8: 11402259,Ca8: 11611003,Ca8: 11611012,Ca8: 11616667,Ca8: 11651928,Ca8: 11659801
Ca8_Block_8	8	11732473-11780269	Ca8: 11732473,Ca8: 11732491,Ca8: 11736056,Ca8: 11780232,Ca8: 11780267,Ca8: 11780269
Ca8_Block_9	8	14467549-14745841	Ca8: 14467549,Ca8: 14471182,Ca8: 14497891,Ca8: 14578703,Ca8: 14661428,Ca8: 14661439,Ca8: 14661440,Ca8: 14661453,Ca8: 14661477,Ca8: 14722171,Ca8: 14722204,Ca8: 14726222,Ca8: 14745815,Ca8: 14745841
Ca8_Block_10	8	14775875-14775912	Ca8: 14775875,Ca8: 14775912
Ca8_Block_11	8	14778377-14778407	Ca8: 14778377,Ca8: 14778407
Ca8_Block_12	8	16219588-16436108	Ca8: 16219588,Ca8: 16259584,Ca8: 16291425,Ca8: 16378714,Ca8: 16395505,Ca8: 16436108
