# Supplementary material for: Genomic Analysis of Vavilov’s Historic Chickpea Landraces Reveals Footprints of Environmental and Human Selection
Source: Int J Mol Sci. 2020 May 31;21(11):3952. doi: 10.3390/ijms21113952 (PMC7313079; doi:10.3390/ijms21113952)
Supplement: Supplementary file 1 [file ijms-21-03952-s001.zip › TableS11.xlsx]

## Sheet: SNPs
Table S11 SNPs detected in current study and QTLs and SNPs from previous studies.
Chromosome	SNP Position	Phenotype	QTLs and SNPs from previous studies
3	28094292	Plant weight without pods	QTL DTF3A, Phenology, Growth habit, Ortega et al. 2019
4	30948593	Biological yield	Ca4_30858655, Yield (kg/ha), Varshney et al. 2019
4	33967674	Plant weight without pods	QTL CaqPN4.2, Pod number, Das et al. 2016
4	33967674	Seeds weight per plant	QTL CaqPN4.2, Pod number, Das et al. 2016
4	33967674	Biological yield	QTL CaqPN4.2, Pod number, Das et al. 2016
4	33967674	PodsWeigth	QTL CaqPN4.2, Pod number, Das et al. 2016
6	3024192	BegFloBegMatu	Ca6_2937309, Days to 50% flowering, Varshney et al. 2019
8	10314452	Biological yield	Ca8_10339271, Yield per plant (g), Varshney et al. 2019
