# Supplementary material for: Genomic Analysis of Vavilov’s Historic Chickpea Landraces Reveals Footprints of Environmental and Human Selection
Source: Int J Mol Sci. 2020 May 31;21(11):3952. doi: 10.3390/ijms21113952 (PMC7313079; doi:10.3390/ijms21113952)
Supplement: Supplementary file 1 [file ijms-21-03952-s001.zip › TableS12.xlsx]

## Sheet: Haploblocks
Table S12 Haploblocks enriched for SNPs associated with phenotypes and bioclimatic variables detected in current study and QTLs and SNPs from previous studies.
Haploblock	Chromosome	Haploblock position	Variables	QTLs and SNPs from previous studies
Ca1_Block_18	1	7478974-7782518	PDW; PodSH; SizeLeaf; TSW; BIO19	Ca1_7512202, 100 seed weight (g), Varshney et al. 2019
Ca3_Block_4	3	29665307-29909008	PDW; PPP; SPP; SYDS; SizeLeaf; StemBranchinnes1ord	Ca3_29802219, Ca3_29801242, Ca3_29835489, Ca3_29715608, Yield per plant (g), Varshney et al. 2019
Ca3_Block_7	3	31313021-31610758	BegFloEndFlo; EndFloBegMatu; GermBegFlo; SYDS; BIO5; BIO13; BIO16	Ca3_31316497, Days to 50% flowering, Varshney et al. 2019; Ca3_31609674, Yield per plant (g), Varshney et al. 2019
Ca3_Block_16	3	368726216-37143743	GermBegFlo; Ptht; WpWp; BIO3; BIO5	QTL for days to 50% flowering time, Upadhyaya et al. 2015
Ca4_Block_9	4	10873308-11091578	BegFloEndFlo; EndFloBegMatu; Germ; GermBegFlo; PodShat; BIO4; BIO6; BIO7; BIO12	Ca4_10901843, Days to 50% flowering, Varshney et al. 2019
Ca4_Block_18	4	15547293-15790835	StemLength1order; TSW; BIO12	Ca4_15736316, Ca4_15690261, 100 Seed weight (g), Varshney et al. 2019
Ca4_Block_54	4	37188483-37420096	PodSH; PodsWeight; SYDS	Ca4_37261199, Ca4_37352585, Ca4_37257226, Yield per plant (g), Varshney et al. 2019
Ca5_Block_4	5	28469224-28864293	BegFloEndFlo; EndFloBegMatu; Germ; Hlp; PDL; PDW; PPP; PodsWeight; SPP; SYDS; SizeLeaf; BIO8; BIO11; BIO12; BIO13; BIO15; BIO16	Ca5_28637394, Ca5_28549176, Ca5_28796923, Ca5_28628392, Ca5_28610522, Ca5_28553731, Ca5_28603931, Ca5_28534252, Yield per plant (g), Varshney et al. 2019
Ca6_Block_3	6	2541669-3024335	Germ; GermBegFlo; BIO2; BIO14; BIO17; BIO19; DEM	Ca6: 29205940 SNP loci regulating diverse plant growth habit, Upadhyaya et al. 2017
Ca7_Block_12	7	32401115-32894822	BegFloEndFlo; BegMatuEndMatu; EndFloBegMatu; SPP; StemBranchness; BIO3	Ca7_32856911, Days to maturity, Varshney et al. 2019
Ca8_Block_7	8	11251550-11659801	FloCol; FlowstemColo; SCO; StemBranchinnes1ord; StemBranchness; StemColo	Ca8: 11544119, Branch number, Bajaj et al. 2016
